# Supplementary material for: Phylogenetic Revision and Patterns of Host Specificity in the Fungal Subphylum Entomophthoromycotina
Source: Microorganisms. 2022 Jan 24;10(2):256. doi: 10.3390/microorganisms10020256 (PMC8879804; doi:10.3390/microorganisms10020256)
Supplement: Supplementary file 1 [file microorganisms-10-00256-s001.zip]

Archive with 4 entries (4 files):
- Supplementary Figures S1-S5.pdf
- Table S1.xlsx
- Table S2.txt
- Table S3.xlsx
