# Supplementary material for: Phylogenetic Revision and Patterns of Host Specificity in the Fungal Subphylum Entomophthoromycotina
Source: Microorganisms. 2022 Jan 24;10(2):256. doi: 10.3390/microorganisms10020256 (PMC8879804; doi:10.3390/microorganisms10020256)
Supplement: Supplementary file 1 [file microorganisms-10-00256-s001.zip › Table S1.xlsx]

## Sheet: A) LSU 28S
Table S1: Detailed overview of all species, representative strains and loci from which the LSU (A), SSU (B) and RPB2 (C) sequences were obtained for this study.
Species	Strain	Locus
Basidiobolus haptosporus	ATCC 16579	EF392424
Basidiobolus haptosporus	ARSEF 8307	EF392418
Basidiobolus haptosporus	ARSEF 6380	EF392417
Basidiobolus haptosporus	ARSEF 261	EF392410
Basidiobolus haptosporus	ARSEF 8309	EF392420
Basidiobolus haptosporus	NRRL 28035	AF113451
Basidiobolus heterosporus	ARSEF 262	EF392411
Basidiobolus heterosporus	ATCC 16580	EF392423
Basidiobolus magnus	ATCC 15379	EF392425
Basidiobolus meristosporus	ATCC 14450	EF392422
Basidiobolus microsporus	ARSEF 265	DQ364202
Basidiobolus ranarum	ARSEF 8328	EF392421
Basidiobolus ranarum	ARSEF 8308	EF392419
Basidiobolus ranarum	ARSEF 1139	EF392413
Basidiobolus ranarum	ARSEF 260	EF392409
Basidiobolus ranarum	/	JN201893
Basidiobolus ranarum	NRRL 20525	AF113452
Basidiobolus ranarum	AFTOL 301	DQ273807
Basidiobolus sp.	ARSEF 2787	EF392414
Basidiobolus sp.	ARSEF 5889	EF392415
Basidiobolus sp.	ARSEF 5903	EF392416
Basidiobolus sp.	ARSEF 263	EF392412
Batkoa apiculata	ARSEF 3130	EF392404
Batkoa gigantea	ARSEF 214	JX242591
Batkoa gigantea	ARSEF 214	EF392373
Batkoa major	ARSEF 2936	EF392401
Batkoa major	ARSEF 919	EF392392
Batkoa major	ARSEF 3102	EF392376
Batkoa major	ARSEF 365	EF392375
Batkoa sp.	ARSEF 328	EF392375
Conidiobolus antarcticus	ARSEF 6913	DQ364207
Conidiobolus bangalorensis	ARSEF 449	DQ364204
Conidiobolus brefeldianus	ARSEF 452	EF392382
Conidiobolus coronatus	FSU 4392	JN939190
Conidiobolus coronatus	NRRL 28638	AY235033
Conidiobolus coronatus	AFTOL 137	AY546691
Conidiobolus coronatus	NRRL 28638	NG_027617
Conidiobolus coronatus	RCEF 4518	JN131537
Conidiobolus coronatus	NRRL 1912	AF113455
Conidiobolus coronatus	IFM 46067	AB363771
Conidiobolus coronatus	VPCI-126P	FN421423
Conidiobolus coronatus	RCEF 5598	JQ004791
Conidiobolus coronatus	RCEF 5599	JQ004792
Conidiobolus coronatus	RCEF 5600	JQ004793
Conidiobolus coronatus	RCEF 5601	JQ004794
Conidiobolus coronatus	ARSEF 206	DQ364201
Conidiobolus coronatus	ARSEF 421	DQ364203
Conidiobolus coronatus	ARSEF 525	DQ364205
Conidiobolus couchii	ATCC 18152	JN131538
Conidiobolus denaeosporus	ATCC 12940	JF816215
Conidiobolus firmipilleus	RCEF 4429	JF816222
Conidiobolus firmipilleus	ARSEF 6384	JX242592
Conidiobolus gonimedes	ATCC 14445	JF816221
Conidiobolus heterosporus	RCEF 4430	JF816225
Conidiobolus heterosporus	ARSEF 6385	JX242593
Conidiobolus humicola	ATCC 28849	JF816220
Conidiobolus incongruus	NRRL 28636	AF113457
Conidiobolus lamprauges	UTHSCRSA R-4463	HM593512
Conidiobolus lamprauges	NRRL 28637	AF113458
Conidiobolus lamprauges	ARSEF 2338	DQ364206
Conidiobolus lichenicola	ATCC 16200	JF816216
Conidiobolus lobatus	ATCC 18153	JF816218
Conidiobolus nanodes	CBS 183.62	JX242594
Conidiobolus nanodes	FSU 885	JN939189
Conidiobolus nodosus	ATCC 16577	JF816217
Conidiobolus politocus	ATCC 12244	JF816213
Conidiobolus obscurus	ARSEF 74	EF392369
Conidiobolus obscurus	CBS 182.60	JX242595
Conidiobolus obscurus	CBS 181.60	JX242600
Conidiobolus osmodes	ARSEF 79	EF392371
Conidiobolus osmodes	ARSEF 193	DQ364200
Conidiobolus osmodes	RCEF 4447	JN131539
Conidiobolus osmodes	ARSEF 79	DQ364199
Conidiobolus pseudapiculatus	ARSEF 1662	EF392398
Conidiobolus pseudapiculatus	ARSEF 395	EF392378
Conidiobolus pumilus	ARSEF 453	EF392383
Conidiobolus pumilus	ATCC 12584	FJ545245
Conidiobolus pumilus	ARSEF 453	JX242596
Conidiobolus rhysosporus	RCEF 4879	JN131541
Conidiobolus rhysosporus	ATCC 12588	JN131540
Conidiobolus thromboides	ARSEF 115	EF392370
Conidiobolus thromboides	FSU 798	JN939188
Conidiobolus thromboides	ARSEF 70	DQ364198
Conidiobolus thromboides	CBS 180.60	JX242599
Conidiobolus thromboides	FSU 785	JX242597
Conidiobolus thromboides	ATCC 12587	JF816214
Conidiobolus thromboides	RCEF 4492	JF816223
Conidiobolus stromoideus	ATCC 15430	JF816219
Conidiobolus sp.	RCEF 5348	JN131542
Conidiobolus sp.	RCEF 4952	JF816224
Entomophaga aulicae	ARSEF 172	EF392372
Entomophaga destruens	CBS 208.65	JX242598
Entomophaga maimaiga	ARSEF 1400	EF392395
Entomophthora caroliniana	ARSEF 640	EF392387
Entomophthora ferdinandii	isolate Mdom	GQ285882
Entomophthora muscae	AFTOL ID-28	DQ273772
Entomophthora muscae	ARSEF 3074	NG_027647
Entomophthora muscae	ARSEF 6815	DQ481225
Entomophthora muscae	ARSEF 6132	DQ481224
Entomophthora muscae	ARSEF 6716	EF392408
Entomophthora planchoniana	isolate Afab	GQ285873
Entomophthora planchoniana	isolate Asam	GQ285874
Entomophthora planchoniana	isolate Cela	GQ285875
Entomophthora planchoniana	isolate Cfra	GQ285876
Entomophthora planchoniana	isolate Eabi	GQ285877
Entomophthora planchoniana	ARSEF 6252	GQ285878
Entomophthora planchoniana	isolate Rpad	GQ285879
Entomophthora planchoniana	isolate Save	GQ285880
Entomophthora planchoniana	isolate Pxyl	GQ285881
Entomophthora scatophaga	ARSEF 6704	DQ481226
Entomophthora schizophorae	ARSEF 6817	DQ481228
Entomophthora schizophorae	ARSEF 5348	GQ285883
Entomophthora schizophorae	ARSEF 6137	DQ481227
Entomophthora syrphi	ARSEF 5595	DQ481230
Entomophthora sp.	ARSEF 6701	DQ481229
Erynia conica	ARSEF 1439	EF392396
Erynia ovispora	ARSEF 400	JX242601
Erynia ovispora	ARSEF 400	EF392381
Erynia radicans	CBS 607.92	JN939182
Erynia rhizospora	ARSEF 1441	EF392381
Erynia sciarae	ARSEF 1870	EF392399
Eryniopsis caroliniana	ARSEF 640	EF392372
Furia americana	ARSEF 742	EF392389
Furia gastropachae	ARSEF 5541	EF392407
Furia ithacensis	ARSEF 663	EF392388
Furia neopyralidarium	ARSEF 1145	EF392394
Furia pieris	ARSEF 781	EF392390
Massospora cicadina	ARSEF 374	EF392377
Pandora blunckii	ARSEF 217	EF392374
Pandora blunckii	ARSEF 217	JX242602
Pandora delphacis	ARSEF 581	EF392386
Pandora delphacis	ARSEF 459	EF392384
Pandora dipterigena	ARSEF 397	EF392380
Pandora kondoiensis	CBS 642.92	JX242603
Pandora kondoiensis	ARSEF 825	EF392394
Pandora neoaphidis	ARSEF 3240	EF392405
Schizangiella serpentis	ARSEF 8000	EF392426
Schizangiella serpentis	ARSEF 203	EF392428
Schizangiella sp.	ARSEF 2237	EF392429
Strongwellsea castrans	/	AF052406
Zoophthora anglica	ARSEF 396	EF392379
Zoophthora lanceolata	ARSEF 469	EF392385
Zoophthora occidentalis	ARSEF 207	JX242604
Zoophthora occidentalis	ARSEF 3073	EF392402
Zoophthora phalloides	ARSEF 2281	EF392400
Zoophthora radicans	ARSEF 4784	EF392406
Zoophthora radicans	ARSEF 388	JX242605
Outgroup species:
Rhizopus oryzae	HM849659	CBS 112.07
Rhizopus microsporus var. azygosporus	HM849666	CBS 357.93
Parasitella parasitica	JN206438	CBS 412.66
Rhizomucor pusillus	HM849716	CBS 354.68
Rhizomucor miehei	HM849717	CBS 182.67
Rhizomucor variabilis	HM849684	CBS 103.93

## Sheet: B) SSU 18S
SSU 18S
Species	Strain	Locus
Basidiobolus ranarum	FSU 770	JQ014008
Batkoa apiculata	ARSEF3130	DQ177437
Batkoa gigantea	ARSEF 214	EF392544
Batkoa gigantea	ARSEF 214	JX242611
Batkoa major	ARSEF 365	EF392547
Batkoa major	ARSEF 2936	EF392559
Batkoa sp.	ARSEF 328	EF392546
Conidiobolus brefeldianus	ARSEF 452	AF368506
Conidiobolus coronatus	ARSEF 3087	JQ014011
Conidiobolus coronatus	NRRL28638	NG_017182
Conidiobolus coronatus	NRRL28638	AF113418
Conidiobolus coronatus	NRRL 28638	AF296753
Conidiobolus coronatus	FSU 4392	JQ014010
Conidiobolus coronatus	NRRL 28638	D29947
Conidiobolus coronatus	NRRL1912	AF113417
Conidiobolus coronatus	ARSEF 206	EF392543
Conidiobolus coronatus	RSL-I	FJ895303
Conidiobolus firmipilleus	/	AF368507
Conidiobolus firmipilleus	ARSEF 6384	JX242612
Conidiobolus heterosporus	ARSEF 6386	JX242613
Conidiobolus incongruus	p82487/09	HQ200416
Conidiobolus incongruus	B7586	AF113419
Conidiobolus lamprauges	BLDCL-02	GQ478280
Conidiobolus lamprauges	BLDCL-03	GQ478281
Conidiobolus lamprauges	UTHSCSA	HM593511
Conidiobolus lamprauges	CBS 153.56	AF296754
Conidiobolus lamprauges	CBS 153.56 isolate M290	GQ221848
Conidiobolus lamprauges	CBS 153.56 isolate M273	GQ217491
Conidiobolus lamprauges	CBS 153.56 isolate M303	GQ221849
Conidiobolus lamprauges	CBS 153.56	AF113420
Conidiobolus lamprauges	BLDCL-01	GQ478279
Conidiobolus nanodes	FSU 885	JQ014012
Conidiobolus obscurus	ARSEF 74	EF392541
Conidiobolus obscurus	CBS 182.60	JX242614
Conidiobolus obscurus	ARSEF 133	AF296756
Conidiobolus obscurus	CBS 182.60 isolate 560	AF296757
Conidiobolus obscurus	CBS 182.60	AF368508
Conidiobolus obscurus	FSU 886	JQ014014
Conidiobolus obscurus	CBS 181.60	JX242619
Conidiobolus osmodes	CBS 155.56	AF368510
Conidiobolus pseudapiculatus	ARSEF 1662	EF392557
Conidiobolus pumilus	ARSEF 453	JX242615
Conidiobolus pumilus	CBS 156.56	AF368511
Conidiobolus rhysosporus	CBS 157.56	AF368512
Conidiobolus sp.	RSL-II	FJ895304
Conidiobolus thromboides	FSU 785	JX242616
Conidiobolus thromboides	CBS 180.60	JX242618
Conidiobolus thromboides	FSU 785	JQ014013
Conidiobolus thromboides	FSU 785	AF052401
Conidiobolus thromboides	ARSEF 115	JQ014015
Entomophaga aulicae	ARSEF 172	EF392542
Entomophaga destruens	CBS 208.65	JX242617
Entomophaga maimaiga	ARSEF 1400	EF392556
Entomophthora chromaphidis	ARSEF 1860	AF353725
Entomophthora culicis	/	AF368516
Entomophthora muscae	isolate AFTOL-ID	AY635820
Entomophthora muscae	ARSEF 3074	NG_017183
Entomophthora muscae	/	D29948
Entomophthora muscae	ARSEF 6716	EF392564
Entomophthora planchoniana	ARSEF 6251	AF353723
Entomophthora planchoniana	/	AF353724
Entomophthora thripidum	/	AF296755
Entomophthora schizophora	/	AF052402
Entomophthoraceae sp	ARSEF 7942	EF392563
Erynia conica	/	AF368513
Erynia ovispora	ARSEF 400	EF392549
Erynia ovispora	ARSEF 400	JX242620
Erynia radicans	CSB 607.92	JQ014018
Erynia rhizospora	/	AF368514
Erynia sciarae	/	AF368515
Eryniopsis caroliniana	ARSEF 640	EF392552
Eryniopsis caroliniana	/	AF368517
Eryniopsis ptycopterae	/	AF052403
Furia americana	ARSEF 742	EF392554
Furia gastropachae	ARSEF 5541	EF392562
Furia ithacensis	/	AF351134
Furia ithacensis	ARSEF 663	EF392553
Furia neopyralidarum	/	AF368518
Furia pieris	/	AF368519
Furia virescens	ARSEF 1129	EF392555
Macrobiotophthora vermicola	/	AF052400
Massospora cicadina	/	DQ177436
Massospora cicadina	ARSEF 374	EF392548
Pandora blunckii	ARSEF 217	AF368520
Pandora blunckii	ARSEF 217	JX242621
Pandora bullata	ARSEF 116	HQ677592
Pandora delphacis	/	AF368521
Pandora delphacis	ARSEF 581	EF392551
Pandora dipterigena	/	AF368522
Pandora kondoiensis	CBS 642.92	JX242622
Pandora kondoiensis	/	AF351133
Pandora neoaphidis	ARSEF 3240	EF392560
Pandora neoaphidis	/	HQ677591
Pandora neoaphidis	/	AF052405
Pandora nouryi	ARSEF 366	HQ677594
Pandora nouryi	ARSEF 362	HQ677593
Strongwellsea castrans	/	AF052406
Zoophthora anglica	/	AF368524
Zoophthora lanceolata	ARSEF 469	EF392550
Zoophthora occidentalis	ARSEF 207	JX242623
Zoophthora occidentalis	/	AF368525
Zoophthora phalloides	ARSEF 2281	EF392558
Zoophthora radicans	ARSEF 4784	EF392561
Zoophthora radicans	ARSEF 4784	D61381
Zoophthora radicans	ARSEF 4784	AF052404
Zoophthora radicans	ARSEF 388	JX242624
Outgroup species:
Rhizopus oryzae	FSU 8743	JQ014050
Rhizopus stolonifer	DAOM 225707	JN939006

## Sheet: C) RPB2
RPB2
Species	Strain	Locus
Batkoa apiculata	ARSEF 3130	EF392459
Batkoa gigantea	ARSEF 214	EF392433
Batkoa major	ARSEF 919	EF392449
Batkoa major	ARSEF 2936	EF392457
Conidiobolus antarcticus	ARSEF 6913	DQ364217
Conidiobolus brefeldianus	ARSEF 452	EF392439
Conidiobolus coronatus	AFTOL-ID 137	DQ302779
Conidiobolus coronatus	ARSEF 421	DQ364213
Conidiobolus coronatus	ARSEF 525	DQ364215
Conidiobolus coronatus	ARSEF 206	DQ364211
Conidiobolus lamprauges	ARSEF 2338	DQ364216
Conidiobolus obscurus	ARSEF 74	EF392430
Conidiobolus obscurus	CBS 182.60	JX266785
Conidiobolus osmodes	ARSEF 79	EF392431
Conidiobolus osmodes	ARSEF 193	DQ364210
Conidiobolus osmodes	ARSEF 79	DQ364209
Conidiobolus pseudapiculatus	ARSEF 395	EF392435
Conidiobolus pseudapiculatus	ARSEF 1662	EF392454
Conidiobolus pumilus	ARSEF 453	EF392440
Conidiobolus thromboides	ARSEF 115	EF392432
Conidiobolus thromboides	FSU 785	JX266783
Conidiobolus thromboides	ARSEF 70	DQ364208
Entomophaga destruens	CBS 208.65	JX266784
Entomophthora muscae	AFTOL-ID 28	DQ302778
Entomophthora muscae	ARSEF 6716	EF392463
Entomophthoraceae sp.	ARSEF 7942	EF392482
Erynia conica	ARSEF 1439	EF392452
Erynia ovispora	ARSEF 400	EF392438
Erynia ovispora	ARSEF 400	JX266786
Erynia rhizospora	ARSEF 1441	EF392453
Erynia sciarae	ARSEF 1870	EF392455
Eryniopsis caroliniana	ARSEF 640	EF392444
Furia americana	ARSEF 742	EF392446
Furia gastropachae	ARSEF 5541	EF392462
Furia ithacensis	ARSEF 663	EF392445
Furia neopyralidarum	ARSEF 1145	EF392451
Furia pieris	ARSEF 781	EF392447
Furia virescens	ARSEF 1129	EF392450
Pandora blunckii	ARSEF 217	EF392434
Pandora blunckii	ARSEF 217	JX266787
Pandora delphacis	ARSEF 459	EF392441
Pandora delphacis	ARSEF 581	EF392443
Pandora dipterigena	ARSEF 397	EF392437
Pandora kondoiensis	ARSEF 825	EF392448
Pandora kondoiensis	CBS 642.92	JX266788
Pandora neoaphidis	ARSEF 1985	GU132822
Pandora neoaphidis	ARSEF 2018	GU132823
Pandora neoaphidis	ARSEF 5372	GU132824
Pandora neoaphidis	ARSEF 5995	GU132825
Pandora neoaphidis	ARSEF 639	GU132826
Pandora neoaphidis	ARSEF 7937	GU132827
Pandora neoaphidis	ARTpn7	GU132836
Pandora neoaphidis	isolate 171	GU132840
Pandora neoaphidis	ARSEF 7939	GU132828
Pandora neoaphidis	isolate 127	GU132829
Pandora neoaphidis	isolate 107	GU132830
Pandora neoaphidis	ARTpn3	GU132832
Pandora neoaphidis	ARTpn4	GU132833
Pandora neoaphidis	ARTpn5	GU132834
Pandora neoaphidis	isolate 145	GU132837
Pandora neoaphidis	isolate 158	GU132838
Pandora neoaphidis	isolate 176	GU132839
Pandora neoaphidis	ARTpn2	GU132831
Pandora neoaphidis	ARTpn6	GU132835
Pandora neoaphidis	ARSEF 3240	EF392460
Zoophthora anglica	ARSEF 396	EF392436
Zoophthora lanceolata	ARSEF 469	EF392442
Zoophthora occidentalis	ARSEF 3073	EF392458
Zoophthora occidentalis	ARSEF 207	JX266789
Zoophthora phalloides	ARSEF 2281	EF392456
Zoophthora radicans	ARSEF 4784	EF392461
Outgroup species:
Rhizopus oryzae	CBS 282.52	HQ450321
Rhizopus oryzae	CBS 110.17	HQ450319
Rhizopus oryzae	NRRL A-10884	HQ450345
Rhizopus oryzae	NRRL 28631	HQ45033
Rhizopus delemar	NRRL 21447	HQ450363
Rhizopus delemar	NRRL 1551	HQ450351
