# Supplementary material for: Phylogenetic Revision and Patterns of Host Specificity in the Fungal Subphylum Entomophthoromycotina
Source: Microorganisms. 2022 Jan 24;10(2):256. doi: 10.3390/microorganisms10020256 (PMC8879804; doi:10.3390/microorganisms10020256)
Supplement: Supplementary file 1 [file microorganisms-10-00256-s001.zip › Table S2.txt]

>Table S2: LSU (A), SSU (B) and RPB2 (C) sequence data after alignment with MAFFT (version 7.123, accessed 15th of April 2013). 
>LSU Sequences (A)
>JN201893
------------------------------------------------------------
------------------------------------------------------------
g----------------------------------------ttgtagtttgaaga----a
gtgttttccgcg-gcggctgcagtacaaatcctttggaaca-gggtatcagagagggtga
gaatcccg-tctttgactgcagactagttg--cactgtgat-acactttctaagagtcga
gttgtttgggaatgcagctcaaaatgggtggtaaatttcatctaaagctaaatattggca
agaga-ccgatagcgaacaagtaccgtgagggaaagatgaaa-agaactttgaaaagaga
gttaaatagtacgtgaaattgttaaaagggaaacgcttgaagtcagtgttgccggcggaa
aatcagcttcagactggagacttgcgtgggtggaggg----------agtgttaaaaccc
cttgcctacgtacaggcgcctgga-----t-----ggagtgcacttttcagt-----cgg
caggtcaacatcaatttcagccggtggaaaaaagctagcggaacgtaggttggagcaatc
ta----------------------------------------------------------
-----------------------------------------------------actg---
----------------------------------------------ttatagccgcct-g
ccaatacactgggtgggattgaggacagcagtgcaggcc---------a-------ttat
ggcggaagctcagtgtcattctccggggggcatgtcaagacagcttgctgacttggtgtg
tacactcttgggaacgatgcggatgt----a-----------------------------
------------------------------------------------------------
------------------------------------------------------------
------------------------------------------------------------
------------------------------------------------------------
------------------------------------------------------------
------------------------------------------------------------
------------------------------------------------------------
------------------------------------------------------------
------------------------------------------------------------
------------------------------------------------------------
------------------------------------------------------------
------------------------------------------------------------
------------------------------------------------------------
------------------------------------------------------------
------------------------------------------------------------
------------------------------------------------------------
------------------------------------------------------------
------------------------------------------------------------
------------------------------------------------------------
------------------------------------------------------------
------------------------------------------------------------
------------------------------------------------------------
------------------------------------------------------------
------------------------------------------------------------
------------------------------------------------------------
------------------------------------------------------------
------------------------------------------------------------
------------------------------------------------------------
------------------------------------------------------------
------------------------------------------------------------
------------------------------------------------------------
------------------------------------------------------------
------------------------------------------------------------
------------------------------------------------------------
------------------------------------------------------------
------------------------------------------------------------
------------------------------------------------------------
------------------------------------------------------------
------------------------------------------------------------
------------------------------------------------------------
------------------------------------------------------------
------------------------------------------------------------
------------------------------------------------------------
------------------------------------------------------------
-----------
>EF392425
------------------------------------------------------------
--------------ggattcccc--tag-taacggcgagtgaagcgggaa--gagctcaa
atttaaaatctg-taaggttcaacct-------tgccgag-ttgtagtttgaaga----a
gtgttttccgcg-gcggctgcagtacaaatcctttggaaca-gggtatcagagagggtga
gaatcccg-tctttgactgcagactagttg--cactgtgat-acactttctaagagtcga
gttgtttgggaatgcagctcaaaatgggtggtaaatttcatctaaagctaaatattggca
agaga-ccgatagcgaacaagtaccgtgagggaaagatgaaa-agaactttgaaaagaga
gttaaatagtacgtgaaattgttaaaagggaaacgcttgaagtcagtgttgccggcggaa
aatcagcttcagactggagacttgcgtgggtggaggg----------agtgttaaaaccc
cttgcctacgtacaggaacttgga-----t-----ggagtgcacttttcagt-----cgg
caggtcaacatcaatttcagccggtggaaaaaagctagcggaacgtaggttggagcaatc
ta----------------------------------------------------------
-----------------------------------------------------actg---
----------------------------------------------ttatagccgcct-g
ccaatacactgggtgggattgaggacagcagtgcaggcc---------a-------ttat
ggcggaagctctgtgtcattctccggggggcatgtcaagacagcttgctgacttggtgtg
tacactcttgggaacgatgcggatgt----acttctcctgcactaaggatgttgacgaaa
tgg--ct--------------------------ttaaacgacccgtcttgaaacacggac
caaggagtctaacaaat-atgcgagtatttgggtg---gc--aaacccatatgcgcaatg
aaagtgaatgt------aggtgggatctcacg------cttcggcgagg-----gtgcac
catcgaccgatctgga-----ttattttatgatagatttgagtaagagcatatctgttgg
gacccg-aaagatggtgaa-ctatgcctgaatagggtgaagccagaggaaa-ctct----
----------------ggtggaggctcgta-gcga-------------------------
------------------------------------------------------------
-ttctga-cgtgcaaatcgatcgt-caaatttgggtata-ggggcgaaagactaat----
------------------------------------------------------------
------------------------------------------------------------
------------------------------------------------------------
------------------------------------------------------------
------------------------------------------------------------
------------------------------------------------------------
------------------------------------------------------------
------------------------------------------------------------
------------------------------------------------------------
------------------------------------------------------------
------------------------------------------------------------
------------------------------------------------------------
------------------------------------------------------------
------------------------------------------------------------
------------------------------------------------------------
------------------------------------------------------------
------------------------------------------------------------
------------------------------------------------------------
------------------------------------------------------------
------------------------------------------------------------
------------------------------------------------------------
------------------------------------------------------------
------------------------------------------------------------
------------------------------------------------------------
------------------------------------------------------------
------------------------------------------------------------
------------------------------------------------------------
------------------------------------------------------------
------------------------------------------------------------
------------------------------------------------------------
------------------------------------------------------------
------------------------------------------------------------
------------------------------------------------------------
------------------------------------------------------------
------------------------------------------------------------
------------------------------------------------------------
-----------
>EF392413
------------------------------------------------------------
--------------ggattcccc--tag-taacggcgagtgaagcgggaa--gagctcaa
atttaaaatctg-taaggttcaacct-------tgccgag-ttgtagtttgaaga----a
gtgttttccgcg-gcggctgcagtacaaatcctttggaaca-gggtatcagagagggtga
gaatcccg-tctttgactgcagactagttg--cactgtgat-acactttctaagagtcga
gttgtttgggaatgcagctcaaaatgggtggtaaatttcatctaaagctaaatattggca
agaga-ccgatagcgaacaagtaccgtgagggaaagatgaaa-agaactttgaaaagaga
gttaaatagtacgtgaaattgttaaaagggaaacgcttgaagtcagtgttgccggcggaa
aatcagcttcagactggagacttgcgtgggtggaggg----------agtgttaaaaccc
cttgcctacgtacaggaacttgga-----t-----ggagtgcacttttcagt-----cgg
caggtcaacatcaatttcagccggtggaaaaaagctagcggaacgtaggttggagcaatc
ta----------------------------------------------------------
-----------------------------------------------------actg---
----------------------------------------------ttatagccgcct-g
ccaatacactgggtgggattgaggacagcagtgcaggcc---------a-------ttat
ggcggaagctctgtgtcattctccggggggcatgtcaagacagcttgctgacttggtgtg
tacactcttgggaacgatgcggatgt----acttctcctgcactaaggatgttgacgaaa
tgg--ct--------------------------ttaaacgacccgtcttgaaacacggac
caaggagtctaacaaat-atgcgagtatttgggtg---gc--aaacccatatgcgcaatg
aaagtgaatgt------aggtgggatctcacg------cttcggcgagg-----gtgcac
catcgaccgatctgga-----ttattttatgatagatttgagtaagagcatatctgttgg
gacccg-aaagatggtgaa-ctatgcctgaatagggtgaagccagaggaaa-ctct----
----------------ggtggaggctcgta-gcga-------------------------
------------------------------------------------------------
-ttctga-cgtgcaaatcgatcgt-caaatttgggtata-ggggcgaaagacta------
------------------------------------------------------------
------------------------------------------------------------
------------------------------------------------------------
------------------------------------------------------------
------------------------------------------------------------
------------------------------------------------------------
------------------------------------------------------------
------------------------------------------------------------
------------------------------------------------------------
------------------------------------------------------------
------------------------------------------------------------
------------------------------------------------------------
------------------------------------------------------------
------------------------------------------------------------
------------------------------------------------------------
------------------------------------------------------------
------------------------------------------------------------
------------------------------------------------------------
------------------------------------------------------------
------------------------------------------------------------
------------------------------------------------------------
------------------------------------------------------------
------------------------------------------------------------
------------------------------------------------------------
------------------------------------------------------------
------------------------------------------------------------
------------------------------------------------------------
------------------------------------------------------------
------------------------------------------------------------
------------------------------------------------------------
------------------------------------------------------------
------------------------------------------------------------
------------------------------------------------------------
------------------------------------------------------------
------------------------------------------------------------
------------------------------------------------------------
-----------
>EF392419
------------------------------------------------------------
-------------aggattcccc--tag-taacggcgagtgaagcgggaa--gagctcaa
atttaaaatctg-taaggttcaacct-------tgccgag-ttgtagtttgaaga----a
gtgttttccgcg-gcggctgcagtacaaatcctttggaaca-gggtatcagagagggtga
gaatcccg-tctttgactgcagactagttg--cactgtgat-acactttctaagagtcga
gttgtttgggaatgcagctcaaaatgggtggtaaatttcatctaaagctaaatattggca
agaga-ccgatagcgaacaagtaccgtgagggaaagatgaaa-agaactttgaaaagaga
gttaaatagtacgtgaaattgttaaaagggaaacgcttgaagtcagtgttgccggcggaa
aatcagcttcagactggagacttgcgtgggtggaggg----------agtgttaaaaccc
cttgcctacgtacaggaacttgga-----t-----ggagtgcacttttcagt-----cgg
caggtcaacatcaatttcagccggtggaaaaaagctagcggaacgtaggttggagcaatc
ta----------------------------------------------------------
-----------------------------------------------------actg---
----------------------------------------------ttatagccgcct-g
ccaatacactgggtgggattgaggacagcagtgcaggcc---------a-------ttat
ggcggaagctctgtgtcattctccggggggcatgtcaagacagcttgctgacttggtgtg
tacactcttgggaacgatgcggatgt----acttctcctgcactaaggatgttgacgaaa
tgg--ct--------------------------ttaaacgacccgtcttgaaacacggac
caaggagtctaacaaat-atgcgagtatttgggtg---gc--aaacccatatgcgcaatg
aaagtgaatgt------aggtgggatctcacg------cttcggcgagg-----gtgcac
catcgaccgatctgga-----ttattttatgatagatttgagtaagagcatatctgttgg
gacccg-aaagatggtgaa-ctatgcctgaatagggtgaagccagaggaaa-ctct----
----------------ggtggaggctcgta-gcga-------------------------
------------------------------------------------------------
-ttctga-cgtgcaaatcgatcgt-caaatttgggtata-ggggcgaaagacta------
------------------------------------------------------------
------------------------------------------------------------
------------------------------------------------------------
------------------------------------------------------------
------------------------------------------------------------
------------------------------------------------------------
------------------------------------------------------------
------------------------------------------------------------
------------------------------------------------------------
------------------------------------------------------------
------------------------------------------------------------
------------------------------------------------------------
------------------------------------------------------------
------------------------------------------------------------
------------------------------------------------------------
------------------------------------------------------------
------------------------------------------------------------
------------------------------------------------------------
------------------------------------------------------------
------------------------------------------------------------
------------------------------------------------------------
------------------------------------------------------------
------------------------------------------------------------
------------------------------------------------------------
------------------------------------------------------------
------------------------------------------------------------
------------------------------------------------------------
------------------------------------------------------------
------------------------------------------------------------
------------------------------------------------------------
------------------------------------------------------------
------------------------------------------------------------
------------------------------------------------------------
------------------------------------------------------------
------------------------------------------------------------
------------------------------------------------------------
-----------
>EF392421
------------------------------------------------------------
-----------------------------taacggcgagtgaagcgggaa--gagctcaa
atttaaaatctg-taaggttcaacct-------tgccgag-ttgtagtttgaaga----a
gtgttttccgcg-gcggctgcagtacaaatcctttggaaca-gggtatcagagagggtga
gaatcccg-tctttgactgcagactagttg--cactgtgat-acactttctaagagtcga
gttgtttgggaatgcagctcaaaatgggtggtaaatttcatctaaagctaaatattggca
agaga-ccgatagcgaacaagtaccgtgagggaaagatgaaa-agaactttgaaaagaga
gttaaatagtacgtgaaattgttaaaagggaaacgcttgaagtcagtgttgccggcggaa
aatcagcttcagactggagacttgcgtgggtggaggg----------agtgttaaaaccc
cttgcctacgtacaggaacttgga-----t-----ggagtgcacttttcagt-----cgg
caggtcaacatcaatttcagccggtggaaaaaagctagcggaacgtaggttggagcaatc
ta----------------------------------------------------------
-----------------------------------------------------actg---
----------------------------------------------ttatagccgcct-g
ccaatacactgggtgggattgaggacagcagtgcaggcc---------a-------ttat
ggcggaagctctgtgtctttctccggggggcatgtcaagacagcttgctgacttggtgtg
tacactcttgggaacgatgcggatgt----acttctcctgcactaaggatgttgacgaaa
tgg--ct--------------------------ttaaacgacccgtcttgaaacacggac
caaggagtctaacaaat-atgcgagtatttgggtg---gc--aaacccatatgcgcaatg
aaagtgaatgt------aggtgggatctcacg------cttcggcgagg-----gtgcac
catcgaccgatctgga-----ttattttatgatagatttgagtaagagcatatctgttgg
gacccg-aaagatggtgaa-ctatgcctgaatagggtgaagccagaggaaa-ctct----
----------------ggtggaggctcgta-gcga-------------------------
------------------------------------------------------------
-ttctga-cgtgcaaatcgatcgt-caaatttgggtata-ggggcgaaagacta------
------------------------------------------------------------
------------------------------------------------------------
------------------------------------------------------------
------------------------------------------------------------
------------------------------------------------------------
------------------------------------------------------------
------------------------------------------------------------
------------------------------------------------------------
------------------------------------------------------------
------------------------------------------------------------
------------------------------------------------------------
------------------------------------------------------------
------------------------------------------------------------
------------------------------------------------------------
------------------------------------------------------------
------------------------------------------------------------
------------------------------------------------------------
------------------------------------------------------------
------------------------------------------------------------
------------------------------------------------------------
------------------------------------------------------------
------------------------------------------------------------
------------------------------------------------------------
------------------------------------------------------------
------------------------------------------------------------
------------------------------------------------------------
------------------------------------------------------------
------------------------------------------------------------
------------------------------------------------------------
------------------------------------------------------------
------------------------------------------------------------
------------------------------------------------------------
------------------------------------------------------------
------------------------------------------------------------
------------------------------------------------------------
------------------------------------------------------------
-----------
>NG_027562
tcttgatctcaaatcaggtaggattacccgctgaacttaagcatatcaataagcggagga
aaagaaactaacaaggattcccc--tag-taacggcgagtgaagcgggaa--gagctcaa
atttaaaatctg-taaggttcaacct-------tgccgag-ttgtagtttgaaga----a
gtgttttccgcg-gcggctgcagtacaaatcctttggaaca-gggtatcagagagggtga
gaatcccg-tctttgactgcagactagttg--cactgtgat-acactttctaagagtcga
gttgtttgggaatgcagctcaaaatgggtggtaaatttcatctaaagctaaatattggca
agaga-ccgatagcgaacaagtaccgtgagggaaagatgaaa-agaactttgaaaagaga
gttaaatagtacgtgaaattgttaaaagggaaacgcttgaagtcagtgttgccggcggaa
aatcagcttcagactggagacttgcgtgggtggaggg----------agtgttaaaaccc
cttgcctacgtacaggaacttgga-----t-----ggagtgcacttttcagt-----cgg
caggtcaacatcaatttcagccggtggaaaaaagctagcggaacgtaggttggagcaatc
ta----------------------------------------------------------
-----------------------------------------------------actg---
----------------------------------------------ttatagccgcma-g
ccaatacactgggtgggattgaggacagcagtgcaggcc---------a-------ttat
ggcggaagctcagtgtcattctccggggggcatgtcaagacagcttgctgacttggtgtg
tacactcttgggaacgatgcggatgt----acttctcctgcactaaggatgttgacgaaa
tgg--ct--------------------------ttaaacgacccgtcttgaaacacggac
caaggagtctaacaaat-atgcgagtatttgggtg---gc--aaacccatatgcgcaatg
aaagtgaatgt------aggtgggatctcacg------cttcggcgagg-----gtgcac
catcgaccgatctgga-----ttattttatgatagatttgagtaagagcatatctgttgg
gacccg-aaagatggtgaa-ctatgcctgaatagggtgaagccagaggaaa-ctct----
----------------ggtggaggctcgta-gcga-------------------------
------------------------------------------------------------
-ttctga-cgtgcaaatcgatcgt-caaatttgggtata-ggggcgaaagactaatcgaa
ccatctagtagctggttcctgccgaagtttccctcaggatagcagaaactcattgaacag
ttttatgaggtaaagcgaatgattagaggatttagggatgaaacatccttaacctattct
caaactttaaatatgtaagacgtccatgttacttaattgaacgtggactatcgaatgaga
gtttctagtgggccatttttggtaagcagaactggcgatgcgggatgaaccgaacgtgag
gttaaggtgccggaatacacgctcatttagacaccacaaaaggtgttagttcatctagac
agcaggacggtggccatggaagtcggaatccgctaaggagtgtgtaacaactcacctgcc
gaatgaactagccctgaaaatggatggcgctcaagcgtgttacccatacctcaccgtcaa
ggttaaagcgaagccttgacgagtaggcaggcgtggaggttgtgaagaagcttcgggagt
gatcccaagtcgaacggcctctagtgcagatcttggtggtagtagcaaatattcaaatga
gaactttgaagactgaagtggagaaaggttccgtgtgaacagcagttggacacgggttag
tcgatcctaagagatagggaagctccgttttaaagcgtgcgattcaccgcaccacctatc
gaaagggaatcaggttaatattcctgaaccaggatacggattatgtattacggcaacgta
aatgaactcggagacgccagcacatgccctgggaagagttttcttttctttttaacagct
tatcaccctgaaatcagattaactggagctagggttcaatagctggtagagcactacaac
tctgtagtgtccggtgcgtatgtgacggcccttgaaaatccgagggaaagaatcagtttc
gtgcctggtcgtactcataaccgcagcaggtctccaaggtgaacagcctctagttgatag
aacaatgtagataagggaagtcggcaaaatagatccgtaacttcgggaaaaggattggct
ctaagggttgggtagtctgggctgtgtttagaagccgcgggactgcacttggactacgac
tgccgcaaggcggttgcggaccgggagcggatctgcgtgtggaagagcacggtttcccyc
gcaagggggaagactgggctacgctgaacaaccaacttagaactggtacggacaagggga
atctgactgtctaattaaaacatagcattgcgatggccagaaagtggtgttgacgcaatg
tgatttctgcccagtgctctgaatgtcaaagtgaagaaattcaaccaagcgcgggtaaac
ggcgggagtaactatgactctcttaaggtagccaaatgcctcgtcatctaattagtgacg
cgcatgaatggattaacgagattcccactgtccctatctactatctagcgaaaccacagc
caagggaacgggcttggcaaaatcagcggggaaagaagaccctgttgagcttgactctag
tttgacattgtgaaaagacatagagggtgtagaataagtgggagacttcggtcgacagtg
aaataccactacctttatcgtttttttacttatttaatgaggtagaagcgggcttcatcg
cccaccttctagcgttaaggttccatttacttgcgaactgatctaggttaaagacattgt
caggtggggagtttggctggggcggcacatctgttaaaagataacgcaggtgtcctaagg
gggactcattgagaacagaaatctcaagtagaacaaaagggtaaaagtccccttgatttt
gattttcagtgtgaatacaaaccatgaaagtgtggcctatcgatcctttagtcccttgaa
atttaaggctagaggtgtcagaaaagttaccacagggataactggcttgtggcagccaag
cgttcatagcgacgttgctttttgatccttcgatgtcggctcttcctatcatactgaagc
agaattcagtaagcgttggattgttcacccactaatagggaacgtgagctgggtttagac
cgtcgtgagacaggttagttttaccctactgatgaattgttgttgcaatagtaattcaac
ttagtacgagaggaaccgttgattcagataattggtatttgcccttggctgacaagccaa
tggggcgaagc
>DQ273807
tcttgatctcaaatcaggtaggattacccgctgaacttaagcatatcaataagcggagga
aaagaaactaacaaggattcccc--tag-taacggcgagtgaagcgggaa--gagctcaa
atttaaaatctg-taaggttcaacct-------tgccgag-ttgtagtttgaaga----a
gtgttttccgcg-gcggctgcagtacaaatcctttggaaca-gggtatcagagagggtga
gaatcccg-tctttgactgcagactagttg--cactgtgat-acactttctaagagtcga
gttgtttgggaatgcagctcaaaatgggtggtaaatttcatctaaagctaaatattggca
agaga-ccgatagcgaacaagtaccgtgagggaaagatgaaa-agaactttgaaaagaga
gttaaatagtacgtgaaattgttaaaagggaaacgcttgaagtcagtgttgccggcggaa
aatcagcttcagactggagacttgcgtgggtggaggg----------agtgttaaaaccc
cttgcctacgtacaggaacttgga-----t-----ggagtgcacttttcagt-----cgg
caggtcaacatcaatttcagccggtggaaaaaagctagcggaacgtaggttggagcaatc
ta----------------------------------------------------------
-----------------------------------------------------actg---
----------------------------------------------ttatagccgcma-g
ccaatacactgggtgggattgaggacagcagtgcaggcc---------a-------ttat
ggcggaagctcagtgtcattctccggggggcatgtcaagacagcttgctgacttggtgtg
tacactcttgggaacgatgcggatgt----acttctcctgcactaaggatgttgacgaaa
tgg--ct--------------------------ttaaacgacccgtcttgaaacacggac
caaggagtctaacaaat-atgcgagtatttgggtg---gc--aaacccatatgcgcaatg
aaagtgaatgt------aggtgggatctcacg------cttcggcgagg-----gtgcac
catcgaccgatctgga-----ttattttatgatagatttgagtaagagcatatctgttgg
gacccg-aaagatggtgaa-ctatgcctgaatagggtgaagccagaggaaa-ctct----
----------------ggtggaggctcgta-gcga-------------------------
------------------------------------------------------------
-ttctga-cgtgcaaatcgatcgt-caaatttgggtata-ggggcgaaagactaatcgaa
ccatctagtagctggttcctgccgaagtttccctcaggatagcagaaactcattgaacag
ttttatgaggtaaagcgaatgattagaggatttagggatgaaacatccttaacctattct
caaactttaaatatgtaagacgtccatgttacttaattgaacgtggactatcgaatgaga
gtttctagtgggccatttttggtaagcagaactggcgatgcgggatgaaccgaacgtgag
gttaaggtgccggaatacacgctcatttagacaccacaaaaggtgttagttcatctagac
agcaggacggtggccatggaagtcggaatccgctaaggagtgtgtaacaactcacctgcc
gaatgaactagccctgaaaatggatggcgctcaagcgtgttacccatacctcaccgtcaa
ggttaaagcgaagccttgacgagtaggcaggcgtggaggttgtgaagaagcttcgggagt
gatcccaagtcgaacggcctctagtgcagatcttggtggtagtagcaaatattcaaatga
gaactttgaagactgaagtggagaaaggttccgtgtgaacagcagttggacacgggttag
tcgatcctaagagatagggaagctccgttttaaagcgtgcgattcaccgcaccacctatc
gaaagggaatcaggttaatattcctgaaccaggatacggattatgtattacggcaacgta
aatgaactcggagacgccagcacatgccctgggaagagttttcttttctttttaacagct
tatcaccctgaaatcagattaactggagctagggttcaatagctggtagagcactacaac
tctgtagtgtccggtgcgtatgtgacggcccttgaaaatccgagggaaagaatcagtttc
gtgcctggtcgtactcataaccgcagcaggtctccaaggtgaacagcctctagttgatag
aacaatgtagataagggaagtcggcaaaatagatccgtaacttcgggaaaaggattggct
ctaagggttgggtagtctgggctgtgtttagaagccgcgggactgcacttggactacgac
tgccgcaaggcggttgcggaccgggagcggatctgcgtgtggaagagcacggtttcccyc
gcaagggggaagactgggctacgctgaacaaccaacttagaactggtacggacaagggga
atctgactgtctaattaaaacatagcattgcgatggccagaaagtggtgttgacgcaatg
tgatttctgcccagtgctctgaatgtcaaagtgaagaaattcaaccaagcgcgggtaaac
ggcgggagtaactatgactctcttaaggtagccaaatgcctcgtcatctaattagtgacg
cgcatgaatggattaacgagattcccactgtccctatctactatctagcgaaaccacagc
caagggaacgggcttggcaaaatcagcggggaaagaagaccctgttgagcttgactctag
tttgacattgtgaaaagacatagagggtgtagaataagtgggagacttcggtcgacagtg
aaataccactacctttatcgtttttttacttatttaatgaggtagaagcgggcttcatcg
cccaccttctagcgttaaggttccatttacttgcgaactgatctaggttaaagacattgt
caggtggggagtttggctggggcggcacatctgttaaaagataacgcaggtgtcctaagg
gggactcattgagaacagaaatctcaagtagaacaaaagggtaaaagtccccttgatttt
gattttcagtgtgaatacaaaccatgaaagtgtggcctatcgatcctttagtcccttgaa
atttaaggctagaggtgtcagaaaagttaccacagggataactggcttgtggcagccaag
cgttcatagcgacgttgctttttgatccttcgatgtcggctcttcctatcatactgaagc
agaattcagtaagcgttggattgttcacccactaatagggaacgtgagctgggtttagac
cgtcgtgagacaggttagttttaccctactgatgaattgttgttgcaatagtaattcaac
ttagtacgagaggaaccgttgattcagataattggtatttgcccttggctgacaagccaa
tggggcgaagc
>AF113452
------------------------------------------------------------
--------taacaaggattcccc--tag-taacggcgagtgaagcgggaa--gagctcaa
atttaaaatctg-taaggttcaacct-------tgccgag-ttgtagtttgaaga----a
gtgttttccgcg-gcggctgcagtacaaatcctttggaaca-gggtatcagagagggtga
gaatcccg-tctttgactgcagactagttg--cactgtgat-acactttctaagagtcga
gttgtttgggaatgcagctcaaaatgggtggtaaatttcatctaaagctaaatattggca
agaga-ccgatagcgaacaagtaccgtgagggaaagatgaaa-agaactttgaaaagaga
gttaaatagtacgtgaaattgttaaaagggaaacgcttgaagtcagtgttgccggcggaa
aatcagcttcagactggagacttgcgtgggtggaggg----------agtgttaaaaccc
cttgcctacgtacaggaacctgga-----t-----ggagtgcacttttcagt-----cgg
caggtcaacatcaatttcagccggtggaaaaaagctagcggaacgtaggttggagcaatc
ta----------------------------------------------------------
-----------------------------------------------------actg---
----------------------------------------------ttatagccgcca-g
ccaatacactgggtgggattgaggacagcagtgcaggcc---------a-------ttat
ggcggaagctcagtgtcattctccggggggcatgtcaagacagcttgctgacttggtgtg
tacactcttgggaacgatgcggatgt----acttctcctgcactaaggatgttgacgaaa
tgg--ct--------------------------t--------------------------
------------------------------------------------------------
------------------------------------------------------------
------------------------------------------------------------
------------------------------------------------------------
------------------------------------------------------------
------------------------------------------------------------
------------------------------------------------------------
------------------------------------------------------------
------------------------------------------------------------
------------------------------------------------------------
------------------------------------------------------------
------------------------------------------------------------
------------------------------------------------------------
------------------------------------------------------------
------------------------------------------------------------
------------------------------------------------------------
------------------------------------------------------------
------------------------------------------------------------
------------------------------------------------------------
------------------------------------------------------------
------------------------------------------------------------
------------------------------------------------------------
------------------------------------------------------------
------------------------------------------------------------
------------------------------------------------------------
------------------------------------------------------------
------------------------------------------------------------
------------------------------------------------------------
------------------------------------------------------------
------------------------------------------------------------
------------------------------------------------------------
------------------------------------------------------------
------------------------------------------------------------
------------------------------------------------------------
------------------------------------------------------------
------------------------------------------------------------
------------------------------------------------------------
------------------------------------------------------------
------------------------------------------------------------
------------------------------------------------------------
------------------------------------------------------------
------------------------------------------------------------
------------------------------------------------------------
-----------
>EF392409
------------------------------------------------------------
--------------ggattcccc--tag-taacggcgagtgaagcgggaa--gagctcaa
atttaaaatctg-taaggttcaacct-------tgccgagattgtagtttgaaga----a
gtgttttccgcg-gcggctgcagtacaaatcctttggaaca-gggtatcagagagggtga
gaatcccg-tctttgactgcagactagttg--cactgtgat-acactttctaagagtcga
gttgtttgggaatgcagctcaaaatgggtggtaaatttcatctaaagctaaatattggca
agaga-ccgatagcgaacaagtaccgtgagggaaagatgaaa-agaactttgaaaagaga
gttaaatagtacgtgaaattgttaaaagggaaacgcttgaagtcagtgttgccggcggaa
aatcagcttcagactggagacttgcgtgggtggaggg----------agtgttaaaaccc
cttgcctacgtacaggaacttgga-----t-----ggagtgcacttttcagt-----cgg
caggtcaacatcaatttcagccggtggaaaaaagctagcggaacgtaggttggagcaatc
ta----------------------------------------------------------
-----------------------------------------------------actg---
----------------------------------------------ttatagccgcaa-g
ccaatacactgggtgggattgaggacagcagtgcaggcc---------a-------ttat
ggcggaagctcagtgtcattctccggggggcatgtcaagacagcttgctgacttggtgtg
tacactcttgggaacgatgcggatgt----acttctcctgcactaaggatgttgacgaaa
tgg--ct--------------------------ttaaacgacccgtcttgaaacacggac
caaggagtctaacaaat-atgcgagtatttgggtg---gc--aaacccatatgcgcaatg
aaagtgaatgt------aggtgggatctcacg------cttcggcgagg-----gtgcac
catcgaccgatctgga-----ttattttatgatagatttgagtaagagcatatctgttgg
gacccg-aaagatggtgaa-ctatgcctgaatagggtgaagccagaggaaa-ctct----
----------------ggtggaggctcgta-gcga-------------------------
------------------------------------------------------------
-ttctga-cgtgcaaatcgatcgt-caaatttgg--------------------------
------------------------------------------------------------
------------------------------------------------------------
------------------------------------------------------------
------------------------------------------------------------
------------------------------------------------------------
------------------------------------------------------------
------------------------------------------------------------
------------------------------------------------------------
------------------------------------------------------------
------------------------------------------------------------
------------------------------------------------------------
------------------------------------------------------------
------------------------------------------------------------
------------------------------------------------------------
------------------------------------------------------------
------------------------------------------------------------
------------------------------------------------------------
------------------------------------------------------------
------------------------------------------------------------
------------------------------------------------------------
------------------------------------------------------------
------------------------------------------------------------
------------------------------------------------------------
------------------------------------------------------------
------------------------------------------------------------
------------------------------------------------------------
------------------------------------------------------------
------------------------------------------------------------
------------------------------------------------------------
------------------------------------------------------------
------------------------------------------------------------
------------------------------------------------------------
------------------------------------------------------------
------------------------------------------------------------
------------------------------------------------------------
------------------------------------------------------------
-----------
>EF392420
------------------------------------------------------------
-------------aggattcccc--tagttaacggcgagtgaagcgggaa--gagctcaa
atttaaaatctg-taaggttcaacct-------tgccgag-ttgtagtttgaaga----a
gtgttttccgcg-gcggctgcagtacaaatcctttggaaca-gggtatcagagagggtga
gaatcccg-tctttgactgcagactagttg--cactgtgat-acgctttctaagagtcga
gttgtttgggaatgcagctcaaaatgggtggtaaatttcatctaaagctaaatattggca
agaga-ccgatagcgaacaagtaccgtgagggaaagatgaaa-agaactttgaaaagaga
gttaaatagtacgtgaaattgttaaaagggaaacgcttgaagtcagtgttgccggcggaa
aatcagcttcagacgagcgacttgcgcaggtggaggg----------agtgttaaagccc
cttgcctgcgtacaggagcgcgga-----t-----ggagtgcacttttcagt-----cgg
caggtcaacatcaatttcagccggtggataaaagctagcggaacgtaggttggagcaatc
ca----------------------------------------------------------
-----------------------------------------------------actg---
----------------------------------------------ttatagccgcct-g
ccgatacactgggtgggattgaggacagcagtgcaggcc---------a-------ttat
ggcggaagctctgtgttcctctccggggggcatgccaagacagcttgctgacttggtgtg
tacactcttgggaagaatgcggatgt----acttctcctgcactaaggatgttgacgaaa
tgg--ct--------------------------ttaaacgacccgtcttgaaacacggac
caaggagtctaacaaat-atgcgagtatttgggtg---gc--aaacccatatgcgcaatg
aaagtgaatgt------aggtgggatctcacg------cttcggcgagg-----gtgcac
catcgaccgatctgga-----ttattttatgatagatttgagtaagagcatatctgttgg
gacccg-aaagatggtgaa-ctatgcctgaatagggtgaagccagaggaaa-ctct----
----------------ggtggaggctcgta-gcga-------------------------
------------------------------------------------------------
-ttctga-cgtgcaaatcgatcgt-caaatttgggtata-ggggcgaaagacta------
------------------------------------------------------------
------------------------------------------------------------
------------------------------------------------------------
------------------------------------------------------------
------------------------------------------------------------
------------------------------------------------------------
------------------------------------------------------------
------------------------------------------------------------
------------------------------------------------------------
------------------------------------------------------------
------------------------------------------------------------
------------------------------------------------------------
------------------------------------------------------------
------------------------------------------------------------
------------------------------------------------------------
------------------------------------------------------------
------------------------------------------------------------
------------------------------------------------------------
------------------------------------------------------------
------------------------------------------------------------
------------------------------------------------------------
------------------------------------------------------------
------------------------------------------------------------
------------------------------------------------------------
------------------------------------------------------------
------------------------------------------------------------
------------------------------------------------------------
------------------------------------------------------------
------------------------------------------------------------
------------------------------------------------------------
------------------------------------------------------------
------------------------------------------------------------
------------------------------------------------------------
------------------------------------------------------------
------------------------------------------------------------
------------------------------------------------------------
-----------
>EF392410
------------------------------------------------------------
-------------aggattcccc--tag-taacggcgagtgaagcgggaa--gagctcaa
atttaaaatctg-taaggttcaacct-------tgccgag-ttgtagtttgaaga----a
gtgttttccgcg-gcggctgcagtacaaatcctttggaaca-gggtatcagagagggtga
gaatcccg-tctttgactgcagactagttg--cactgtgat-acgctttctaagagtcga
gttgtttgggaatgcagctcaaaatgggtggtaaatttcatctaaagctaaatattggca
agaga-ccgatagcgaacaagtaccgtgagggaaagatgaaa-agaactttgaaaagaga
gttaaatagtacgtgaaattgttaaaagggaaacgcttgaagtcagtgttgccggcggaa
aatcagcttcagacgagcgacttgcgtaggtggaggg----------agtgttaaaaccc
cttgcctgcgtacaggagcgcgga-----t-----ggagtgcacttttcagt-----cgg
caggtcaacatcaatttcagccggtggacaaaagctagcggaacgtaggttggagcaatc
ca----------------------------------------------------------
-----------------------------------------------------actg---
----------------------------------------------ttatagccgcca-g
ccgatacactgggtgggattgaggacagcagtgcaggcc---------a-------ttat
ggcggaagctctgtgttcctctccggggggcatgccaagacagcttgctgacttggtgtg
tacactcttgggaagaatgcggatgt----acttctcctgcactaaggatgttgacgaaa
tgg--ct--------------------------ttaaacgacccgtcttgaaacacggac
caaggagtctaacaaat-atgcgagtatttgggtg---gc--aaacccatatgcgcaatg
aaagtgaatgt------aggtgggatctcacg------cttcggcgagg-----gtgcac
catcgaccgatctgga-----ttattttatgatagatttgagtaagagcatatctgttgg
gacccg-aaagatggtgaa-ctatgcctgaatagggtgaagccagaggaaa-ctct----
----------------ggtggaggctcgta-gcga-------------------------
------------------------------------------------------------
-ttctga-cgtgcaaatcgatcgt-caaatttgggtata-ggggcgaaagacta------
------------------------------------------------------------
------------------------------------------------------------
------------------------------------------------------------
------------------------------------------------------------
------------------------------------------------------------
------------------------------------------------------------
------------------------------------------------------------
------------------------------------------------------------
------------------------------------------------------------
------------------------------------------------------------
------------------------------------------------------------
------------------------------------------------------------
------------------------------------------------------------
------------------------------------------------------------
------------------------------------------------------------
------------------------------------------------------------
------------------------------------------------------------
------------------------------------------------------------
------------------------------------------------------------
------------------------------------------------------------
------------------------------------------------------------
------------------------------------------------------------
------------------------------------------------------------
------------------------------------------------------------
------------------------------------------------------------
------------------------------------------------------------
------------------------------------------------------------
------------------------------------------------------------
------------------------------------------------------------
------------------------------------------------------------
------------------------------------------------------------
------------------------------------------------------------
------------------------------------------------------------
------------------------------------------------------------
------------------------------------------------------------
------------------------------------------------------------
-----------
>EF392417
------------------------------------------------------------
-------------aggattcccc--tag-taacggcgagtgaagcgggaa--gagctcaa
atttaaaatctg-taaggttcaacct-------tgccgag-ttgtagtttgaaga----a
gtgttttccgcg-gcggctgcagtacaaatcctttggaaca-gggtatcagagagggtga
gaatcccg-tctttgactgcagactagttg--cactgtgat-acgctttctaagagtcga
gttgtttgggaatgcagctcaaaatgggtggtaaatttcatctaaagctaaatattggca
agaga-ccgatagcgaacaagtaccgtgagggaaagatgaaa-agaactttgaaaagaga
gttaaatagtacgtgaaattgttaaaagggaaacgcttgaagtcagtgttgccggcggaa
aatcagctttagacgggcgacttgcgtaggtggaggg----------agtgttaaaaccc
cttgcttgcgtacaggagttcgga-----t-----ggagtgcacttttcagt-----cgg
caggtcaacatcaatttcagccggtggataaaagctagcggaacgtaggttggagcaatt
ca----------------------------------------------------------
-----------------------------------------------------actg---
----------------------------------------------ttatagccgcct-g
ccgatacactgggtgggattgaggacagcagtgcaggcc---------a-------ttat
ggcggaagctctgtgttcctctccggggggcatgccaagacagcttgctgacttggtgtg
tacactcttgggaagaatacggatgt----acttctcctgcactaaggatgttgacgaaa
tgg--ct--------------------------ttaaacgacccgtcttgaaacacggac
caaggagtctaacaaat-atgcgagtatttgggtg---gc--aaacccatatgcgcaatg
aaagtgaatgt------aggtgggatctcacg------cttcggcgagg-----gtgcac
catcgaccgatctgga-----ttattttatgatagatttgagtaagagcatatctgttgg
gacccg-aaagatggtgaa-ctatgcctgaatagggtgaagccagaggaaa-ctct----
----------------ggtggaggctcgta-gcga-------------------------
------------------------------------------------------------
-ttctga-cgtgcaaatcgatcgt-caaatttgggtata-ggggcgaaagacta------
------------------------------------------------------------
------------------------------------------------------------
------------------------------------------------------------
------------------------------------------------------------
------------------------------------------------------------
------------------------------------------------------------
------------------------------------------------------------
------------------------------------------------------------
------------------------------------------------------------
------------------------------------------------------------
------------------------------------------------------------
------------------------------------------------------------
------------------------------------------------------------
------------------------------------------------------------
------------------------------------------------------------
------------------------------------------------------------
------------------------------------------------------------
------------------------------------------------------------
------------------------------------------------------------
------------------------------------------------------------
------------------------------------------------------------
------------------------------------------------------------
------------------------------------------------------------
------------------------------------------------------------
------------------------------------------------------------
------------------------------------------------------------
------------------------------------------------------------
------------------------------------------------------------
------------------------------------------------------------
------------------------------------------------------------
------------------------------------------------------------
------------------------------------------------------------
------------------------------------------------------------
------------------------------------------------------------
------------------------------------------------------------
------------------------------------------------------------
-----------
>EF392418
------------------------------------------------------------
-----------acaggattcccc--tag-taacggcgagtgaagcgggaa--gagctcaa
atttaaaatctg-taaggttcaacct-------tgccgag-ttgtagtttgaaga----a
gtgttttccgcg-gcggctgcagtacaaatcctttggaaca-gggtatcagagagggtga
gaatcccg-tctttgactgcagactagttg--cactgtgat-acgctttctaagagtcga
gttgtttgggaatgcagctcaaaatgggtggtaaatttcatctaaagctaaatattggca
agaga-ccgatagcgaacaagtaccgtgagggaaagatgaaa-agaactttgaaaagaga
gttaaatagtacgtgaaattgttaaaagggaaacgcttgaagtcagtgttgccggcggaa
aatcagctttagacgggcgacttgcgtaggtggaggg----------agtgttaaaaccc
cttgcttgcgtacagnagttcgga-----t-----ggagtgcacttttcagt-----cgg
caggtcaacatcaatttcagccggtggataaaagctagcggaacgtaggttggagcaatc
ca----------------------------------------------------------
-----------------------------------------------------actg---
----------------------------------------------ttatagccgcct-g
ccgatacactgggtgggattgaggacagcagtgcaggcc---------a-------ttat
ggcggaagctctgtgttcctctccggggggcatgccaagacagcttgctgacttgntgtg
tacactcttgggaagaatatggatgt----acttctcctgcactaaggatgttgacgaaa
tgg--ct--------------------------ttaaacgacccgtcttgaaacacggac
caaggagtctaacaaat-atgcgagtatttgggtg---gc--aaacccatatgcgcaatg
aaagtgaatgt------aggtgggatctcacg------cttcggcgagg-----gtgcac
catcgaccgatctgga-----ttattttatgatagatttgagtaagagcatatctgttgg
gacccg-aaagatggtgaa-ctatgcctgaatagggtgaagccagaggaaa-ctct----
----------------ggtggaggctcgta-gcga-------------------------
------------------------------------------------------------
-ttctga-cgtgcaaatcgatcgt-caaatttgggtata-ggggcgaaagactaatcga-
------------------------------------------------------------
------------------------------------------------------------
------------------------------------------------------------
------------------------------------------------------------
------------------------------------------------------------
------------------------------------------------------------
------------------------------------------------------------
------------------------------------------------------------
------------------------------------------------------------
------------------------------------------------------------
------------------------------------------------------------
------------------------------------------------------------
------------------------------------------------------------
------------------------------------------------------------
------------------------------------------------------------
------------------------------------------------------------
------------------------------------------------------------
------------------------------------------------------------
------------------------------------------------------------
------------------------------------------------------------
------------------------------------------------------------
------------------------------------------------------------
------------------------------------------------------------
------------------------------------------------------------
------------------------------------------------------------
------------------------------------------------------------
------------------------------------------------------------
------------------------------------------------------------
------------------------------------------------------------
------------------------------------------------------------
------------------------------------------------------------
------------------------------------------------------------
------------------------------------------------------------
------------------------------------------------------------
------------------------------------------------------------
------------------------------------------------------------
-----------
>EF392424
------------------------------------------------------------
--------------ggattcccc--tag-taacggcgagtgaagcgggaa--gagctcaa
atttaaaatctg-caaggttcaacct-------tgccgaa-ttgtagtttgaaga----a
gtgttttccgcg-gcggctgcagtacaaatcctttggaaca-gggtatcagagagggtga
gaatcccg-tctttgactgcagactagttg--cactgtgat-acactttctaagagtcga
gttgtttgggaatgcagctcaaaatgggtggtaaatttcatctaaagctaaatattggca
agaga-ccgatagcgaacaagtaccgtgagggaaagatgaaa-agaactttgaaaagaga
gttaaatagtacgtgaaattgttaaaagggaaacgcttgaagtcagtgttgccggctgaa
aatcagcttcgtgcggcgggcttgctgcggtggaggg----------agtgtcaaaaccc
cttgccgtagtacagccagccgga-----g-----ggagtgcacttttcagt-----cgg
caggtcaacatcaatttcggccggtggaaaaaagcaagtggaatgtaggttggagcgatc
tg----------------------------------------------------------
-----------------------------------------------------actg---
----------------------------------------------ttatagccacta-g
tggatacaccggctgggattgaggacagcagtgcaggcc---------a-------ctat
ggcggaagcgcagcacttttctccggggggcgtgtcaagacagcaagctgacttggtgcg
tacactcttgggaacggggcggccgt----acttctccagcactaaggatgttgacgaaa
tgg--ct--------------------------ttaaacgacccgtcttgaaacacggac
caaggagtctaacaaat-atgcgagtatttgggtg---gc--aaacccatatgcgcaatg
aaagtgaatgt------aggtgggatcccg------------ttg--gg-----gagcac
catcgaccgatctgga-----ttaatttatgatagatttgagtaagagcatatctgttgg
gacccg-aaagatggtgaa-ctatgcctgaatagggtgaagccagaggaaa-ctct----
----------------ggtggaggctcgta-gcga-------------------------
------------------------------------------------------------
-ttctga-cgtgcaaatcgatcgt-caaatttgggtata-ggggcgaaagactaa-----
------------------------------------------------------------
------------------------------------------------------------
------------------------------------------------------------
------------------------------------------------------------
------------------------------------------------------------
------------------------------------------------------------
------------------------------------------------------------
------------------------------------------------------------
------------------------------------------------------------
------------------------------------------------------------
------------------------------------------------------------
------------------------------------------------------------
------------------------------------------------------------
------------------------------------------------------------
------------------------------------------------------------
------------------------------------------------------------
------------------------------------------------------------
------------------------------------------------------------
------------------------------------------------------------
------------------------------------------------------------
------------------------------------------------------------
------------------------------------------------------------
------------------------------------------------------------
------------------------------------------------------------
------------------------------------------------------------
------------------------------------------------------------
------------------------------------------------------------
------------------------------------------------------------
------------------------------------------------------------
------------------------------------------------------------
------------------------------------------------------------
------------------------------------------------------------
------------------------------------------------------------
------------------------------------------------------------
------------------------------------------------------------
------------------------------------------------------------
-----------
>EF392422
------------------------------------------------------------
--------------gattccccc--tag-taacggcgagtgaagcgggaa--gagctcaa
atttaaaatctg-taaggttcaacct-------tgccgaa-ttgtagtttgaaga----a
gtgttttccgcg-gcggctgcagtacaaatcctttggaaca-gggtatcagagagggtga
gaatcccg-tctttgactgcagactagttg--cactgtgat-acactttctaagagtcga
gttgtttgggaatgcagctcaaaatgggtggtaaatttcatctaaagctaaatattggca
agaga-ccgatagcgaacaagtaccgtgagggaaagatgaaa-agaactttgaaaagaga
gttaaatagtacgtgaaattgttaaaagggaaacgcttgaagtcagtgttgccggctgaa
aatcagcttcgtgcggatggcttgctgcggtggaggg----------agtgttaaaaccc
cttgctgtagtacagctagccgga-----c-----ggagtgcacttttcagt-----cga
caggtcaacatcaatttcagccggtggaaaaaagcaagtggaatgtaggttggagcaatc
tg----------------------------------------------------------
-----------------------------------------------------actg---
----------------------------------------------ttatagccacta-g
tgtatacaccggcggggattgaggacagcagtgcaggcc---------a-------ttat
ggcggaagcgctgctcttttctccggggggcgcgtcaagacagcatgctgacttgatgcg
tacactcttgggaacggggcggctgt----acttctcctgcactaaggatgttgacgaaa
tgg--ct--------------------------ttaaacgacccgtcttgaaacacggac
caaggagtctaacaaat-atgcgagtatttgggtg---gc--aaacccatatgcgcaatg
aaagtgaatgt------aggtgggatccca------------gcaatgg-----gagcac
catcgaccgatctgga-----ttttttaatgatagatttgagtaagagcatatctgttgg
gacccg-aaagatggtgaa-ctatgcctgaatagggtgaagccagaggaaa-ctct----
----------------ggtggaggctcgta-gcga-------------------------
------------------------------------------------------------
-ttctga-cgtgcaaatcgatcgt-caaatttgggtata-ggggcgaaagactat-----
------------------------------------------------------------
------------------------------------------------------------
------------------------------------------------------------
------------------------------------------------------------
------------------------------------------------------------
------------------------------------------------------------
------------------------------------------------------------
------------------------------------------------------------
------------------------------------------------------------
------------------------------------------------------------
------------------------------------------------------------
------------------------------------------------------------
------------------------------------------------------------
------------------------------------------------------------
------------------------------------------------------------
------------------------------------------------------------
------------------------------------------------------------
------------------------------------------------------------
------------------------------------------------------------
------------------------------------------------------------
------------------------------------------------------------
------------------------------------------------------------
------------------------------------------------------------
------------------------------------------------------------
------------------------------------------------------------
------------------------------------------------------------
------------------------------------------------------------
------------------------------------------------------------
------------------------------------------------------------
------------------------------------------------------------
------------------------------------------------------------
------------------------------------------------------------
------------------------------------------------------------
------------------------------------------------------------
------------------------------------------------------------
------------------------------------------------------------
-----------
>EF392416
------------------------------------------------------------
-------------aggattcccc--tag-taacggcgagtgaagcgggaa--gagctcaa
atttaaaatctg-taaggttcaacct-------tgccgaa-ttgtagtttgaaga----a
gtgttttccgcg-gcggctgcagtacaaatcctttggaaca-gggtatcagagagggtga
gaatcccg-tctttgactgcagactagttg--cactgtgat-acactttctaagagtcga
gttgtttgggaatgcagctcaaaatgggtggtaaatttcatctaaagctaaatattggca
agaga-ccgatagcgaacaagtaccgtgagggaaagatgaaa-agaactttgaaaagaga
gttaaatagtacgtgaaattgttaaaagggaaacgcttgaagtcagtgttgccggctgaa
aatcagcttcgtgcggatggcttgctgcggtggaggg----------agtgttaaaaccc
cttgctgtagtacagctagccgga-----c-----ggagtgcacttttcagt-----cga
caggtcaacatcaatttcagccggtggaaaaaagcaagtggaatgtaggttggagcaatc
tg----------------------------------------------------------
-----------------------------------------------------actg---
----------------------------------------------ttatagccacta-g
tgtatacaccggcggggattgaggacagcagtgcaggcc---------a-------ctat
ggcggaagcgctgctcttttctccggggggcacgtcaagacagcatgctgacttgatggg
tacactcttgggaacggggcggctgt----acttctcctgcactaaggatgttgacgaaa
tgg--ct--------------------------ttaaacgacccgtcttgaaacacggac
caaggagtctaacaaat-atgcgagtatttgggtg---gc--aaacccatatgcgcaatg
aaagtgaatgt------aggtgggatccca------------gcaatgg-----gagcac
catcgaccgatctgga-----ttttttaaagatagatttgagtaagagcatatctgttgg
gacccg-aaagatggtgaa-ctatgcctgaatagggtgaagccagaggaaa-ctct----
----------------ggtggaggctcgta-gcga-------------------------
------------------------------------------------------------
-ttctga-cgtgcaaatcgatcgt-caaatttgggtata-ggggcgaaagacta------
------------------------------------------------------------
------------------------------------------------------------
------------------------------------------------------------
------------------------------------------------------------
------------------------------------------------------------
------------------------------------------------------------
------------------------------------------------------------
------------------------------------------------------------
------------------------------------------------------------
------------------------------------------------------------
------------------------------------------------------------
------------------------------------------------------------
------------------------------------------------------------
------------------------------------------------------------
------------------------------------------------------------
------------------------------------------------------------
------------------------------------------------------------
------------------------------------------------------------
------------------------------------------------------------
------------------------------------------------------------
------------------------------------------------------------
------------------------------------------------------------
------------------------------------------------------------
------------------------------------------------------------
------------------------------------------------------------
------------------------------------------------------------
------------------------------------------------------------
------------------------------------------------------------
------------------------------------------------------------
------------------------------------------------------------
------------------------------------------------------------
------------------------------------------------------------
------------------------------------------------------------
------------------------------------------------------------
------------------------------------------------------------
------------------------------------------------------------
-----------
>EF392414
------------------------------------------------------------
-------------aggattcccc--tag-taacggcgagtgaagcgggaa--gagctcaa
atttaaaatctg-taaggttcaacct-------tgccgaa-ttgtagtttgaaga----a
gtgttttccgcg-gcggctgcagtacaaatcctttggaaca-gggtatcagagagggtga
gaatcccg-tctttgactgcagactagttg--cactgtgat-acactttctaagagtcga
gttgtttgggaatgcagctcaaaatgggtggtaaatttcatctaaagctaaatattggca
agaga-ccgatagcgaacaagtaccgtgagggaaagatgaaa-agaactttgaaaagaga
gttaaatagtacgtgaaattgttaaaagggaaacgcttgaagtcagtgttgccggcggaa
aatcagcttcgtgcggagggcttgctgcggtggaggg----------agtgttaaaaccc
cttgccgtagtacagccagccgga-----c-----ggagtgcacttttccgt-----cga
caggtcaacatcaatttcagccggtggaaaaaagccagtggaatgtaggttggagcaatc
tg----------------------------------------------------------
-----------------------------------------------------actg---
----------------------------------------------ttatagccacta-g
tgtatacaccggcggggattgaggacagcagtgcaggcc---------a-------ctat
ggcggaagcgctgctcttttctccggggggcacgtcaagacagcatgctgacttgatgtg
tacactcttgggaacggggcggctgt----acttctcctgcactaaggatgttgacgaaa
tgg--ct--------------------------ttaaacgacccgtcttgaaacacggac
caaggagtctaacaaat-atgcgagtatttgggtg---gc--aaacccatatgcgcaatg
aaagtgaatgt------aggtgggatccca------------gcaatgg-----gagcac
catcgaccgatctgga-----ataatttatgatagatttgagtaagagcatatctgttgg
gacccg-aaagatggtgaa-ctatgcctgaatagggtgaagccagaggaaa-ctct----
----------------ggtggaggctcgta-gcga-------------------------
------------------------------------------------------------
-ttctga-cgtgcaaatcgatcgt-caaatttgggtata-ggggcgaaagacta------
------------------------------------------------------------
------------------------------------------------------------
------------------------------------------------------------
------------------------------------------------------------
------------------------------------------------------------
------------------------------------------------------------
------------------------------------------------------------
------------------------------------------------------------
------------------------------------------------------------
------------------------------------------------------------
------------------------------------------------------------
------------------------------------------------------------
------------------------------------------------------------
------------------------------------------------------------
------------------------------------------------------------
------------------------------------------------------------
------------------------------------------------------------
------------------------------------------------------------
------------------------------------------------------------
------------------------------------------------------------
------------------------------------------------------------
------------------------------------------------------------
------------------------------------------------------------
------------------------------------------------------------
------------------------------------------------------------
------------------------------------------------------------
------------------------------------------------------------
------------------------------------------------------------
------------------------------------------------------------
------------------------------------------------------------
------------------------------------------------------------
------------------------------------------------------------
------------------------------------------------------------
------------------------------------------------------------
------------------------------------------------------------
------------------------------------------------------------
-----------
>EF392415
------------------------------------------------------------
--------------ggattcccc--tag-taacggcgagtgaagcgggaa--gagctcaa
atttaaaatctg-taaggttcaacct-------tgccgaa-ttgtagtttgaaga----a
gtgttttccgcg-gcggctgcagtacaaatcctttggaaca-gggtatcagagagggtga
gaatcccg-tctttgactgcagactagttg--cactgtgat-acactttctaagagtcga
gttgtttgggaatgcagctcaaaatgggtggtaaatttcatctaaagctaaatattggca
agaga-ccgatagcgaacaagtaccgtgagggaaagatgaaa-agaactttgaaaagaga
gttaaatagtacgtgaaattgttaaaagggaaacgcttgaagtcagtgttgccggctgaa
aatcagcttcctgcggatggcttgctgcggtggaggg----------agtgttaaaaccc
cttgctgtagtacagttagccgga-----g-----ggagtgcactttttagt-----cgg
caggtcaacatcaatttcagccggtggaaaaaagcaagtggaatgtaggttggagcaatc
tg----------------------------------------------------------
-----------------------------------------------------actg---
----------------------------------------------ttatagccacta-g
tgtatacaccggcggggattgaggacagcagtgcaggcc---------a-------ctat
ggcggaagctctgctcttttctccggggggcgcgtcaagacagcatgctgacttgaggcg
tacactcttgggaacggggcggatgt----acttctcctgcactaaggatgttgacgaaa
tgg--ct--------------------------ttaaacgacccgtcttgaaacacggac
caaggagtctaacaaat-atgcgagtatttgggtg---gc--aaacccatatgcgcaatg
aaagtgaatgt------aggtgggatcccg------------gttacgg-----gagcac
catcgaccgatctgga-----ttttttaaagatagatttgagtaagagcatatctgttgg
gacccg-aaagatggtgaa-ctatgcctgaatagggtgaagccagaggaaa-ctct----
----------------ggtggaggctcgta-gcga-------------------------
------------------------------------------------------------
-ttctga-cgtgcaaatcgatcgt-caaatttgggtata-ggggcgaaagacta------
------------------------------------------------------------
------------------------------------------------------------
------------------------------------------------------------
------------------------------------------------------------
------------------------------------------------------------
------------------------------------------------------------
------------------------------------------------------------
------------------------------------------------------------
------------------------------------------------------------
------------------------------------------------------------
------------------------------------------------------------
------------------------------------------------------------
------------------------------------------------------------
------------------------------------------------------------
------------------------------------------------------------
------------------------------------------------------------
------------------------------------------------------------
------------------------------------------------------------
------------------------------------------------------------
------------------------------------------------------------
------------------------------------------------------------
------------------------------------------------------------
------------------------------------------------------------
------------------------------------------------------------
------------------------------------------------------------
------------------------------------------------------------
------------------------------------------------------------
------------------------------------------------------------
------------------------------------------------------------
------------------------------------------------------------
------------------------------------------------------------
------------------------------------------------------------
------------------------------------------------------------
------------------------------------------------------------
------------------------------------------------------------
------------------------------------------------------------
-----------
>EF392412
------------------------------------------------------------
-------------aggattcccc--tag-taacggcgagtgaagcgggaa--gagctcaa
atttaaaatctg-caaggttcaacct-------tgccgag-ttgtagtttgaaga----a
gtgttttccgcg-gcggctgcagtacaaatcctttggaaca-gggtatcagagagggtga
gaatcccg-tctttgactgcagactagttg--cactgtgat-acactttctaagagtcga
gttgtttgggaatgcagctcaaaatgggtggtaaatttcatctaaagctaaatattggca
agaga-ccgatagcgaacaagtaccgtgagggaaagatgaaa-agaactttgaaaagaga
gttaaatagtacgtgaaattgttaaaagggaaacgcttgaagtcagtgttgccggctgaa
aatcagcttcgtgcggatggcttgctgcggtggaggg----------agtgtcaaagccc
cttgctgcagtacagctagccgga-----c-----ggagtgcacttttcagt-----cgg
caggtcaacatcaatttcagccggtggaaaaaagcaagtggaatgtaggttggagcaatc
tg----------------------------------------------------------
-----------------------------------------------------actg---
----------------------------------------------ttatagccactc-g
tgtatacactggcggggattgaggacagcagtgcaggcc---------a-------ctat
ggcggaagcgctgctcttttctccggggggcacgtcaagacagcatgctgacttggtgtg
tacactcttgggaacggggcggctgt----acttctcctgcactaaggatgttgacgaaa
tgg--ct--------------------------ttaaacgacccgtcttgaaacacggac
caaggagtctaacaaat-atgcgagtatttgggtg---gc--aaacccatatgcgcaatg
aaagtgaatgt------aggtgggatcccg--------------caagg-----gagcac
catcgaccgatctgga-----ttaatttatgatagatttgagtaagagcatatctgttgg
gacccg-aaagatggtgaa-ctatgcctgaatagggtgaagccagaggaaa-ctct----
----------------ggtggaggctcgta-gcga-------------------------
------------------------------------------------------------
-ttctga-cgtgcaaatcgatcgt-caaatttgggtata-ggggcgaaagacta------
------------------------------------------------------------
------------------------------------------------------------
------------------------------------------------------------
------------------------------------------------------------
------------------------------------------------------------
------------------------------------------------------------
------------------------------------------------------------
------------------------------------------------------------
------------------------------------------------------------
------------------------------------------------------------
------------------------------------------------------------
------------------------------------------------------------
------------------------------------------------------------
------------------------------------------------------------
------------------------------------------------------------
------------------------------------------------------------
------------------------------------------------------------
------------------------------------------------------------
------------------------------------------------------------
------------------------------------------------------------
------------------------------------------------------------
------------------------------------------------------------
------------------------------------------------------------
------------------------------------------------------------
------------------------------------------------------------
------------------------------------------------------------
------------------------------------------------------------
------------------------------------------------------------
------------------------------------------------------------
------------------------------------------------------------
------------------------------------------------------------
------------------------------------------------------------
------------------------------------------------------------
------------------------------------------------------------
------------------------------------------------------------
------------------------------------------------------------
-----------
>AF113451
------------------------------------------------------------
--------taacaaggattcccc--tag-taacggcgagtgaagcgggaa--gagctcaa
atttaaaatctg-taaggttcaacct-------tgccgaa-ttgtagtttgaaga----a
gtgttttccgcg-gcggctgcagtacaaatcctttggaaca-gggtatcagagagggtga
gaatcccg-tctttgactgcagactagttg--cactgtgat-acactttctaagagtcga
gttgtttgggaatgcagctcaaaatgggtggtaaatttcatctaaagctaaatattggca
agaga-ccgatagcgaacnnntaccgtgagggaaagatgaaa-agaactttgaaaagaga
gttaaatagtacgtgaaattgttaaaagggaaacgcttgaagtcagtgttgccggctgaa
aatcagcttcctgcggatggcttgctgcggtggaggg----------agtgttaaaaccc
cttgctgtagtacagttagccgga-----g-----ggagtgcactttttagt-----cgg
caggtcaacatcaatttcagccggtggaaaaaagcaagtggaatgtaggttggagcaatc
tg----------------------------------------------------------
-----------------------------------------------------actg---
----------------------------------------------ttatagccacta-g
tgtatacaccggcggggattgaggacagcagtgcaggcc---------a-------ttat
ggcggaagctctgctcttttctccggggggcgtgtcaagacagcatgctgacttgatgcg
tacactcttgggaacggggcggatgt----acttctcctgcactaaggatgttgacgaaa
------------------------------------------------------------
------------------------------------------------------------
------------------------------------------------------------
------------------------------------------------------------
------------------------------------------------------------
------------------------------------------------------------
------------------------------------------------------------
------------------------------------------------------------
------------------------------------------------------------
------------------------------------------------------------
------------------------------------------------------------
------------------------------------------------------------
------------------------------------------------------------
------------------------------------------------------------
------------------------------------------------------------
------------------------------------------------------------
------------------------------------------------------------
------------------------------------------------------------
------------------------------------------------------------
------------------------------------------------------------
------------------------------------------------------------
------------------------------------------------------------
------------------------------------------------------------
------------------------------------------------------------
------------------------------------------------------------
------------------------------------------------------------
------------------------------------------------------------
------------------------------------------------------------
------------------------------------------------------------
------------------------------------------------------------
------------------------------------------------------------
------------------------------------------------------------
------------------------------------------------------------
------------------------------------------------------------
------------------------------------------------------------
------------------------------------------------------------
------------------------------------------------------------
------------------------------------------------------------
------------------------------------------------------------
------------------------------------------------------------
------------------------------------------------------------
------------------------------------------------------------
------------------------------------------------------------
------------------------------------------------------------
-----------
>EF392411
------------------------------------------------------------
-------------aggattcccc--tag-taacggcgagtgaagcgggaa--gagctcaa
atttaaaatctg-taaggttcaacct-------taccgaa-ttgtagtttgaaga----a
gtgttttccgcg-gcggctgcagtacaaatcctttggaaca-gggtatcagagagggtga
gaatcccg-tctttgactgtagactagttg--cactgtgat-acactttctaagagtcga
gttgtttgggaatgcagctcaaaatgggtggtaaatttcatctaaagctaaatattggca
agaga-ccgatagcgaacaagtaccgtgagggaaagatgaaa-agaactttgaaaagaga
gttaaatagtacgtgaaattgttaaaagggaaacgcttgaagtcagtgttgccggcggaa
aatcagcttcatgtggacggtttgctgcggtggaggg----------agtgttaaaaccc
cttgccgtagtacaactggccaga-----t-----ggagtgcacttttcagt-----cgg
caggtcaacatcaatttcagccggtggaaaaaaaccagtggaacgtaggttggagcaatc
tg----------------------------------------------------------
-----------------------------------------------------actg---
----------------------------------------------ttatagccacag-g
tgtatacaccggcggggattgaggacagcagtgtaggcc---------a-------ttat
ggcggaagcttcgagtttttctccggggggcatgtcaagacagcatgctgacttgatgtg
tacactcttgggaacgacgcggatat----acttctcctgcactaaggatgttgacgaaa
tgg--ct--------------------------ttaaacgacccgtcttgaaacacggac
caaggagtctaacaaat-atgcgagtatttgggtg---gc--aaacccatatgcgcaatg
aaagtgaatgt------aggtgggatccca------------gcaatgg-----gagcac
catcgaccgatctgga-----ttaatttatgatagatttgagtaagagcatatctgttgg
gacccg-aaagatggtgaa-ctatgcctgaatagggtgaagccagaggaaa-ctct----
----------------ggtggaggctcgta-gcga-------------------------
------------------------------------------------------------
-ttctga-cgtgcaaatcgatcgt-caaatttgggtata-ggggcgaaagacta------
------------------------------------------------------------
------------------------------------------------------------
------------------------------------------------------------
------------------------------------------------------------
------------------------------------------------------------
------------------------------------------------------------
------------------------------------------------------------
------------------------------------------------------------
------------------------------------------------------------
------------------------------------------------------------
------------------------------------------------------------
------------------------------------------------------------
------------------------------------------------------------
------------------------------------------------------------
------------------------------------------------------------
------------------------------------------------------------
------------------------------------------------------------
------------------------------------------------------------
------------------------------------------------------------
------------------------------------------------------------
------------------------------------------------------------
------------------------------------------------------------
------------------------------------------------------------
------------------------------------------------------------
------------------------------------------------------------
------------------------------------------------------------
------------------------------------------------------------
------------------------------------------------------------
------------------------------------------------------------
------------------------------------------------------------
------------------------------------------------------------
------------------------------------------------------------
------------------------------------------------------------
------------------------------------------------------------
------------------------------------------------------------
------------------------------------------------------------
-----------
>EF392423
------------------------------------------------------------
------------caggattcccc--tag-taacggcgagtgaagcgggaa--gagctcaa
atttaaaatctg-taaggttcaccct-------tgccgaa-ttgtagtttgaaga----a
gtgttttccgcg-gcggctgcagtacaaatcctttggaaca-gggtatcagagagggtga
gaatcccg-tctttgactgtagactagttg--cactgtgat-acactttctaagagtcga
gttgtttgggaatgcagctcaaaatgggtggtaaatttcatctaaagctaaatattggca
agaga-ccgatagcgaacaagtaccgtgagggaaagatgaaa-agaactttgaaaagaga
gttaaatagtacgtgaaattgttaaaagggaaacgcttgaagtcagtgttgccggcggaa
aatcagcttcatgtggacggtttgctgcggtggaggg----------agtgttaaaaccc
cttgcggtagtacaactggccgga-----t-----ggagtgcacttttcagt-----cgg
caggtcaacatcaatttcagccggtggaaaaaaaccagtggaacgtaggttggagcaatc
tg----------------------------------------------------------
-----------------------------------------------------actg---
----------------------------------------------ttatagccacag-g
tgtatacaccggcggggattgaggacagcagtgtaggcc---------a-------ttat
ggcggaagcttcgagtttttctccggggggcacgtcaagacagcatgctgacttggtgtg
tacactcttgggaacgacgcggatat----acttctcctgcactaaggatgttgacgaaa
tgg--ct--------------------------ttaaacgacccgtcttgaaacacggac
caaggagtctaacaaat-atgcgagtatttgggtg---gc--aaacccatatgcgcaatg
aaagtgaatgt------aggtgggatccca------------gcgatgg-----gagcac
catcgaccgatctgga-----ttaatttatgatagatttgagtaagagcatatctgttgg
gacccg-aaagatggtgaa-ctatgcctgaatagggtgaagccagaggaaa-ctct----
----------------ggtggaggctcgta-gcga-------------------------
------------------------------------------------------------
-ttctga-cgtgcaaatcgatcgt-caaatttgggtata-ggggcgaaagactaat----
------------------------------------------------------------
------------------------------------------------------------
------------------------------------------------------------
------------------------------------------------------------
------------------------------------------------------------
------------------------------------------------------------
------------------------------------------------------------
------------------------------------------------------------
------------------------------------------------------------
------------------------------------------------------------
------------------------------------------------------------
------------------------------------------------------------
------------------------------------------------------------
------------------------------------------------------------
------------------------------------------------------------
------------------------------------------------------------
------------------------------------------------------------
------------------------------------------------------------
------------------------------------------------------------
------------------------------------------------------------
------------------------------------------------------------
------------------------------------------------------------
------------------------------------------------------------
------------------------------------------------------------
------------------------------------------------------------
------------------------------------------------------------
------------------------------------------------------------
------------------------------------------------------------
------------------------------------------------------------
------------------------------------------------------------
------------------------------------------------------------
------------------------------------------------------------
------------------------------------------------------------
------------------------------------------------------------
------------------------------------------------------------
------------------------------------------------------------
-----------
>DQ364202
------------------------------------------------------------
--------------------------------cggcgagtgaagcgggaa--gagctcaa
atttaaaatctg-taaggttcaacct-------tgccgag-ttgtagtttgaaga----a
gtgttttccgcg-gcggctgcagtacaaatcctttggaaca-gggtatcagagagggtga
gaatcccg-tctttgactgcagactagttg--cactgtgat-acactttctaagagtcga
gttgtttgggaatgcagctcaaaatgggtggtaaatttcatctaaagctaaatattggca
agaga-ccgatagcgaacaagtaccgtgagggaaagatgaaa-agaactttgaaaagaga
gttaaatagtacgtgaaattgttaaaagggaaacgcttgaagtcagtgttgccggcggaa
aatcagcttcgtgcggacggcttgtcgcggtggaggg----------agtgtcaaagccc
cttgccgcgggacagccgggcgga-----t-----ggagtgcacttttcagt-----cgg
caggtcaacatcaatttcagccggtggaaaaatacaagtggaacgtaggttggagcaatc
cg----------------------------------------------------------
-----------------------------------------------------actg---
----------------------------------------------ttatagccactc-g
tggatacaccggcggggattgaggacagcagtgcaggcc---------a-------ctac
ggcggaagcgcttctcttttcacgggggggcacaccaagacagcaagctgacttggcgtg
tacaccgctgggaacggaggggctg-----acttctcctgcactaaggatgttgacgaaa
tgg--ct--------------------------ttaaacgacccgtcttgaaacacggac
caaggagtctaacaaat-atgcgagtatttgggtg---gc--aaacccatatgcgcaatg
aaagtgaatgt------aggtgggatcccg------------gttacgg-----gagcac
catcgaccgatctgga-----ataatttacgatagatttgagtaagagcatatctgttgg
gacccg-aaagatggtgaa-ctatgcctgaatagggtgaagccagaggaaa-ctct----
----------------ggtggaggctcgta-gcga-------------------------
------------------------------------------------------------
-ttctga-cgtgcaaatcgatcgt-caaatttgggt------------------------
------------------------------------------------------------
------------------------------------------------------------
------------------------------------------------------------
------------------------------------------------------------
------------------------------------------------------------
------------------------------------------------------------
------------------------------------------------------------
------------------------------------------------------------
------------------------------------------------------------
------------------------------------------------------------
------------------------------------------------------------
------------------------------------------------------------
------------------------------------------------------------
------------------------------------------------------------
------------------------------------------------------------
------------------------------------------------------------
------------------------------------------------------------
------------------------------------------------------------
------------------------------------------------------------
------------------------------------------------------------
------------------------------------------------------------
------------------------------------------------------------
------------------------------------------------------------
------------------------------------------------------------
------------------------------------------------------------
------------------------------------------------------------
------------------------------------------------------------
------------------------------------------------------------
------------------------------------------------------------
------------------------------------------------------------
------------------------------------------------------------
------------------------------------------------------------
------------------------------------------------------------
------------------------------------------------------------
------------------------------------------------------------
------------------------------------------------------------
-----------
>EF392429
------------------------------------------------------------
-----------ctaggattccct--cag-taacggcgagtgaagcgggaa--gagctcaa
atttaaaatcgg-tcaagttatttttcaactt-aatcgag-ttgtagtttgaaga--agt
gt-ttatcgact-tcgattctggccaaaatcctttggaaca-aggtatcatagagggtga
aagtcccg-tttttagccagaaattcgcaagtcactgtgat-acactttcaaagagtcga
gttgtttgggaatgcagctcaaaatgggtggtaaatttcatccaaagctaaatattggca
agaga-ccgatagcaaacaagtaccgtgagggaaagatgaaa-agaactttgaaaagaga
gttaaatagtacgtgaaattgttaaaagggaaacgattgaaatcagtgttgcgagctgaa
aatcaacgttgtgatatggggactctgagtagaggta-----tttgagag-cctaaaaaa
cctccctctacccagtagcttcat-attcc-----tgcgtgcacttttctgttttt-tcg
caggtcaacatcaatttctaccagtggaaaaaaagtggagaaatgtagaacttcgg----
------------------------------------------------------------
-----------------------------------------------------tttg---
----------------------------------------------ttatagtcttca-t
tccacgcaatggtagggattgaggatagcagtgtacgcc---------aaat-ttttagg
ggcgaaagtcttgggtagattaccagaaattgcgcagagacagcttgctgactctgcgtt
taacgtaagataatagacttaggtaac---ttttttggtacactaaggatgttgacaaaa
tgg--tt--------------------------ttaaccgacccgtcttgaaacacggac
caaggagtctaacaaat-ctgcgagtatttgggtg---atcaaaccccacatgcgcaatg
aaagtgaatga------aagtgggataactct------------cctagagagtttgcac
cattgaccgatcttt------acttttaagtatagatttgagtaagagcatatttgttag
gacccg-aaagatggtgaa-ctatgcctgaatagggtgaagccagaggaaa-ctct----
----------------ggtggaagctcgta-gcga-------------------------
------------------------------------------------------------
-ttctga-cgtgcaaatcgatcgt-caaatttgggtata-ggggcgaaagact-------
------------------------------------------------------------
------------------------------------------------------------
------------------------------------------------------------
------------------------------------------------------------
------------------------------------------------------------
------------------------------------------------------------
------------------------------------------------------------
------------------------------------------------------------
------------------------------------------------------------
------------------------------------------------------------
------------------------------------------------------------
------------------------------------------------------------
------------------------------------------------------------
------------------------------------------------------------
------------------------------------------------------------
------------------------------------------------------------
------------------------------------------------------------
------------------------------------------------------------
------------------------------------------------------------
------------------------------------------------------------
------------------------------------------------------------
------------------------------------------------------------
------------------------------------------------------------
------------------------------------------------------------
------------------------------------------------------------
------------------------------------------------------------
------------------------------------------------------------
------------------------------------------------------------
------------------------------------------------------------
------------------------------------------------------------
------------------------------------------------------------
------------------------------------------------------------
------------------------------------------------------------
------------------------------------------------------------
------------------------------------------------------------
------------------------------------------------------------
-----------
>EF392428
------------------------------------------------------------
-------------aggattccct--cag-taacggcgagtgaagcgggaa--gagctcaa
atttaaaatcgg-tcaagttaattatcaacttgaatcgag-ttgtagtttgaaga--agt
gttttatcgact-tcgattctggccaaaatcctttggaaca-aggtatcatagagggtga
aagtcccg-tttttagccagaaattcgcaagtcattgtgat-acactttcaaagagtcga
gttgtttgggaatgcagctcaaaatgggtggtaaatttcatccaaagctaaatattggca
agaga-ccgatagcaaacaagtaccgtgagggaaagatgaaa-agaactttgaaaagaga
gttaaatagtacgtgaaattgttaaaagggaaacgattgaaatcagtgttgcgagctgaa
aatcaacgttgtgatatggggactctgagtagaggtaataattttgagagtcctaaaaaa
cctccctctacccagtagcttcataattcc-----tgcgtgcacttttctgtttttatcg
caggtcaacatcaatttctaccagtggaaaaaaaatggagaaatgtagaacttcgg----
------------------------------------------------------------
-----------------------------------------------------tttg---
----------------------------------------------ttatagtcttca-t
tccacgcaatggtagggattgaggattgcagtgtacgcc---------aaatattttagg
ggcgaaagtcttgggtagattaccagaaattgggcagagacagcttgctgactctgtgtt
caacgtaagataatagacttgggtaactttttttttcgtacactaaggatgttgacaaaa
tgg--tt--------------------------ttaaccgacccgtcttgaaacacggac
caaggagtctaacaaat-ctgcgagtatttgggtg---atcaaaccccatatgcgcaatg
aaagtgaatga------aagtgggataactct------------cctagagagtttgcac
cattgaccgatcttt------acttttaagtatagatttgagtaagagcatatttgttag
gacccg-aaagatggtgaa-ctatgcctgaatagggtgaagccagaggaaa-ctct----
----------------ggtggaagctcgtacgcga-------------------------
------------------------------------------------------------
-ttctgancgtgcaaatcgatcgt-caaatttgggtata-ggggcgaaag----------
------------------------------------------------------------
------------------------------------------------------------
------------------------------------------------------------
------------------------------------------------------------
------------------------------------------------------------
------------------------------------------------------------
------------------------------------------------------------
------------------------------------------------------------
------------------------------------------------------------
------------------------------------------------------------
------------------------------------------------------------
------------------------------------------------------------
------------------------------------------------------------
------------------------------------------------------------
------------------------------------------------------------
------------------------------------------------------------
------------------------------------------------------------
------------------------------------------------------------
------------------------------------------------------------
------------------------------------------------------------
------------------------------------------------------------
------------------------------------------------------------
------------------------------------------------------------
------------------------------------------------------------
------------------------------------------------------------
------------------------------------------------------------
------------------------------------------------------------
------------------------------------------------------------
------------------------------------------------------------
------------------------------------------------------------
------------------------------------------------------------
------------------------------------------------------------
------------------------------------------------------------
------------------------------------------------------------
------------------------------------------------------------
------------------------------------------------------------
-----------
>EF392426
------------------------------------------------------------
--------------ggattccct--cag-taacggcgagtgaagcgggaa--gagctcaa
atttaaaatcgg-tcaagttaattatcaacttgaatcgag-ttgtagtttgaaga--agt
gttttatcgact-tcgattctggccaaaatcctttggaaca-aggtatcatagagggtga
aagtcccg-tttttagccagaaattcgcaagtcattgtgat-acactttcaaagagtcga
gttgtttgggaatgcagctcaaaatgggtggtaaatttcatccaaagctaaatattggca
agaga-ccgatagcaaacaagtaccgtgagggaaagatgaaa-agaactttgaaaagaga
gttaaatagtacgtgaaattgttaaaagggaaacgattgaaatcagtgttgcgagctgaa
aatcaacgttgtgatatggggactctgagtagaggtaataattttgagagtcctaaaaaa
cctccctctacccagtagcttcataattcc-----tgcgtgcacttttctgtttttatcg
caggtcaacatcaatttctaccagtggaaaaaaaatggagaaatgtagaacttcgg----
------------------------------------------------------------
-----------------------------------------------------tttg---
----------------------------------------------ttatagtcttca-t
tccacgcaatggtagggattgaggattgcagtgtacgcc---------aaatattttagg
ggcgaaagtcttgggtagattaccagaaattgggcagagacagcttgctgactctgtgtt
caacgtaagataatagacttgggtaactttttttttcgtacactaaggatgttgacaaaa
tgg--tt--------------------------ttaaccgacccgtcttgaaacacggac
caaggagtctaacaaat-ctgcgagtatttgggtg---atcaaaccccatatgcgcaatg
aaagtgaatga------aagtgggataactct------------cctagagagtttgcac
cattgaccgatcttt------acttttaagtatagatttgagtaagagcatatttgttag
gacccg-aaagatggtgaa-ctatgcctgaatagggtgaagccagaggaaa-ctct----
----------------ggtggaagctcgta-gcga-------------------------
------------------------------------------------------------
-ttctga-cgtgcaaatcgatcgt-caaatttgggtata-ggggcgaaa-----------
------------------------------------------------------------
------------------------------------------------------------
------------------------------------------------------------
------------------------------------------------------------
------------------------------------------------------------
------------------------------------------------------------
------------------------------------------------------------
------------------------------------------------------------
------------------------------------------------------------
------------------------------------------------------------
------------------------------------------------------------
------------------------------------------------------------
------------------------------------------------------------
------------------------------------------------------------
------------------------------------------------------------
------------------------------------------------------------
------------------------------------------------------------
------------------------------------------------------------
------------------------------------------------------------
------------------------------------------------------------
------------------------------------------------------------
------------------------------------------------------------
------------------------------------------------------------
------------------------------------------------------------
------------------------------------------------------------
------------------------------------------------------------
------------------------------------------------------------
------------------------------------------------------------
------------------------------------------------------------
------------------------------------------------------------
------------------------------------------------------------
------------------------------------------------------------
------------------------------------------------------------
------------------------------------------------------------
------------------------------------------------------------
------------------------------------------------------------
-----------
>DQ481227
--------------------------------gaatttaagcatattaataagcggagga
aaagaaactaacaaggattcccg--tag-taatggcgaatgaactgggaa--aggctcaa
atttaaaatcacttt------------------ttgtgaa-ttgtagtttaaagg--aaa
taagtctcacag-taatcgctagttaa-gtattctggaatg-aatcgtcatagagggtga
aattcccg--tatacactaga--tagaaagctgcaaagaac-ttttatcctatgagtcgt
gttgcttgtgaatgcagcattaattgggaggtaaattccttctaaggctaaatacaagag
agaga-ccgatagcaaacaagtaccgtgagggaaagatgaaagagaaccctgaaaagggg
actcaaaagaatgtgaaattgtcaaaaggtaagcgctaagaatt---------------g
ttcggaatct--------------------------------------cggttttaa---
-------acttt-tcagagttcgctctgt--------agtttgg-ctggggt--------
--ggctatagcttttgttttgactatcaagaattta--gggatagggattgtaggcctcg
gc-----------------------------------ttaccttttc-------------
-----------------------------------------------------ttga---
----------------------------------------------actaga----ca-a
ttgactgttggagcaggagtaaaagtctcac---aaagg---------tgttgatgaagg
gttttttctcttataggcttgc-ctagaggagtcagaagtctttatcttcttttttat--
-------------------------------------------gagtatttatagttaga
agg--tt--------------------------ctaagcgtcccgtcttgaaacacggac
caaggagtctaacacat-atgcaggtatatgggc----gtcaaacccc--atgcgtaatg
aaagtaatttc------aggtagga--tctcg------------caaga-----gtgcac
tatcaaccgaaccttgtgg--a-cttgttcacaggatttgagt-agagc-----------
------------------------------------------------------------
------------------------------------------------------------
------------------------------------------------------------
------------------------------------------------------------
------------------------------------------------------------
------------------------------------------------------------
------------------------------------------------------------
------------------------------------------------------------
------------------------------------------------------------
------------------------------------------------------------
------------------------------------------------------------
------------------------------------------------------------
------------------------------------------------------------
------------------------------------------------------------
------------------------------------------------------------
------------------------------------------------------------
------------------------------------------------------------
------------------------------------------------------------
------------------------------------------------------------
------------------------------------------------------------
------------------------------------------------------------
------------------------------------------------------------
------------------------------------------------------------
------------------------------------------------------------
------------------------------------------------------------
------------------------------------------------------------
------------------------------------------------------------
------------------------------------------------------------
------------------------------------------------------------
------------------------------------------------------------
------------------------------------------------------------
------------------------------------------------------------
------------------------------------------------------------
------------------------------------------------------------
------------------------------------------------------------
------------------------------------------------------------
------------------------------------------------------------
------------------------------------------------------------
------------------------------------------------------------
------------------------------------------------------------
-----------
>GQ285883
------------------------------------------------------------
----------------attcccg--tag-taatggcgaatgaactgggaa--aggctcaa
atttaaaatcacttt------------------ttgtgaa-ttgtagtttaaagg--aaa
taagtctcacag-taatcgctagttaa-gtattctggaatg-aatcgtcatagagggtga
aattcccg--tatacactaga--tagaaagctgcaaagaac-ttttatcctatgagtcgt
gttgcttgtgaatgcagcattaattgggaggtaaattccttctaaggctaaatacaagag
agaga-ccgatagcaaacaagtaccgtgagggaaagatgaaagagaaccctgaaaagggg
actcaaaagaatgtgaaattgtcaaaaggtaagcgctaagaatt---------------g
ttcggaatct--------------------------------------cggttttaa---
-------acttt-tcagagttcgctctgt--------agtttgg-ctggggt--------
--ggctatagcttttgttttgactatcaagaattta--gggatagggattgtaggcctcg
gc-----------------------------------ttaccttttc-------------
-----------------------------------------------------ttga---
----------------------------------------------actaga----ca-a
ttgactgttggagcaggagtaaaagtctcac---aaagg---------tgttgatgaagg
gttttttctcttataggcttgc-ctagaggagtcagaagtctttatcttcttttttat--
-------------------------------------------gagtatttatagttaga
agg--tt--------------------------ctaagcgtcccgtcttgaaacacggac
caaggagtctaacacat-atgcaggtatatgggc----gtcaaacccc--atgcgtaatg
aaagtaatttc------aggtagga--tctcg------------caaga-----gtgcac
tatcaaccgaaccttgtgg--a-cttgttcacaggatttgagt-agagc-----------
------------------------------------------------------------
------------------------------------------------------------
------------------------------------------------------------
------------------------------------------------------------
------------------------------------------------------------
------------------------------------------------------------
------------------------------------------------------------
------------------------------------------------------------
------------------------------------------------------------
------------------------------------------------------------
------------------------------------------------------------
------------------------------------------------------------
------------------------------------------------------------
------------------------------------------------------------
------------------------------------------------------------
------------------------------------------------------------
------------------------------------------------------------
------------------------------------------------------------
------------------------------------------------------------
------------------------------------------------------------
------------------------------------------------------------
------------------------------------------------------------
------------------------------------------------------------
------------------------------------------------------------
------------------------------------------------------------
------------------------------------------------------------
------------------------------------------------------------
------------------------------------------------------------
------------------------------------------------------------
------------------------------------------------------------
------------------------------------------------------------
------------------------------------------------------------
------------------------------------------------------------
------------------------------------------------------------
------------------------------------------------------------
------------------------------------------------------------
------------------------------------------------------------
------------------------------------------------------------
------------------------------------------------------------
------------------------------------------------------------
-----------
>DQ481228
--------------------------------gaatttaagcatattaataagcggagga
aaagaaactaacaaggattcccg--tag-taatggcgaatgaactgggaa--aggctcaa
atttaaaatcacttt------------------ttgtgaa-ttgtagtttaaagg--aaa
taagtctcacag-taatcgctagttaa-gtattctggaatg-gatcgtcaaggagggtga
aattcccg--tatacactaga--tagaaagctgcaaagaac-ttttatcctatgagtcgt
gttgcttgtgaatgcagcattaattgggaggtaaattccttctaaggctaaatacaagag
agaga-ccgatagcaaacaagtaccgtgagggaaagatgaaagagaaccctgaaaagggg
actcaaaagaatgtgaaattgtcaaaaggtaagcgctaagaatt---------------g
ttcggaatct--------------------------------------cggttttaa---
-------acttt-tcagggttcgctctgt--------agtttgg-ctggggt--------
--ggctatagcttttgttttgactatcaagaattta--ggaatagggattgtaggcctcg
gc-----------------------------------ttaccttttc-------------
-----------------------------------------------------ttga---
----------------------------------------------actaga----ca-a
ttgactgttggagcaggagtaaaagtctcac---aaagg---------tgttgatgaagg
gttttttctcttataggcttgc-ctagaggagtcagaagtctttatcttcttttttat--
-------------------------------------------gagtatttatagttaga
agg--tt--------------------------ctaagcgtcccgtcttgaaacacggac
caaggagtctaacacat-atgcaggtatatgggc----gtcaaacccc--atgcgtaatg
aaagtaatttc------aggtagga--tctcg------------caaga-----gtgcac
tatcaaccgaaccttgtgg--a-cttgttcacaggatttgagt-agagc-----------
------------------------------------------------------------
------------------------------------------------------------
------------------------------------------------------------
------------------------------------------------------------
------------------------------------------------------------
------------------------------------------------------------
------------------------------------------------------------
------------------------------------------------------------
------------------------------------------------------------
------------------------------------------------------------
------------------------------------------------------------
------------------------------------------------------------
------------------------------------------------------------
------------------------------------------------------------
------------------------------------------------------------
------------------------------------------------------------
------------------------------------------------------------
------------------------------------------------------------
------------------------------------------------------------
------------------------------------------------------------
------------------------------------------------------------
------------------------------------------------------------
------------------------------------------------------------
------------------------------------------------------------
------------------------------------------------------------
------------------------------------------------------------
------------------------------------------------------------
------------------------------------------------------------
------------------------------------------------------------
------------------------------------------------------------
------------------------------------------------------------
------------------------------------------------------------
------------------------------------------------------------
------------------------------------------------------------
------------------------------------------------------------
------------------------------------------------------------
------------------------------------------------------------
------------------------------------------------------------
------------------------------------------------------------
------------------------------------------------------------
-----------
>EF392377
------------------------------------------------------------
--------------ggattcccg--tag-taatggcgaatgaactgggaa--aggctcaa
atttaaaatcacttt------------------ttgtgaa-ttgtagtttaaagg--aaa
taagtctcacag-taatcgctagttaa-gtattctggaatg-aatcgtcatagagggtga
aattcccg--tatacactaga--tagaaagctgcaaagaac-ttttatcctatgagtcgt
gttgcttgtgaatgcagcattaattgggaggtaaattccttctaaggctaaatacaagag
agaga-ccgatagcaaacaagtaccgtgagggaaagatgaaagagaaccctgaaaagggg
actcaaaagaatgtgaaattgtcaaaaggtaagcgctaagaatt---------------g
ttcggaatct--------------------------------------cggttttaa---
-------acttt-tcagggttcgctctgt--------agtttgg-ctggggt--------
--ggctatagcttttgttttgactatcaagaattta--ggaatagggattgtaggcctcg
gc-----------------------------------ttaccttttc-------------
-----------------------------------------------------ttga---
----------------------------------------------actaga----ca-a
ttgactgttggagcaggagtaaaagtctcac---aaagg---------tgttgatgaagg
gttttttctcttataggcttgc-ctagaggagtcagaagtctttatcttcttttttat--
-------------------------------------------gagtatttatagttaga
agg--tt--------------------------ctaagcgtcccgtcttgaaacacggac
caaggagtctaacacat-atgcaagtatatgggc----gtcaaaccccagatgcgtaatg
aaagtaatttc------aggtagga--tctcg------------caaga-----gtgcac
tatcaaccgaaccttgtgg--a-cttgttcacaggatttgagtgagagcatatgtgttgg
tacccg-aaagatggtgaa-ctatgcctgaatagggtgaagccagaggaaa-ctct----
----------------ggtggaggctcgta-gcga-------------------------
------------------------------------------------------------
-ttctga-cgtgcaaatcgatcgt-cgaatttgggtata-g-------------------
------------------------------------------------------------
------------------------------------------------------------
------------------------------------------------------------
------------------------------------------------------------
------------------------------------------------------------
------------------------------------------------------------
------------------------------------------------------------
------------------------------------------------------------
------------------------------------------------------------
------------------------------------------------------------
------------------------------------------------------------
------------------------------------------------------------
------------------------------------------------------------
------------------------------------------------------------
------------------------------------------------------------
------------------------------------------------------------
------------------------------------------------------------
------------------------------------------------------------
------------------------------------------------------------
------------------------------------------------------------
------------------------------------------------------------
------------------------------------------------------------
------------------------------------------------------------
------------------------------------------------------------
------------------------------------------------------------
------------------------------------------------------------
------------------------------------------------------------
------------------------------------------------------------
------------------------------------------------------------
------------------------------------------------------------
------------------------------------------------------------
------------------------------------------------------------
------------------------------------------------------------
------------------------------------------------------------
------------------------------------------------------------
------------------------------------------------------------
-----------
>GQ285882
------------------------------------------------------------
----------------attcccg--tag-taatggcgaatgaactgggaa--aggctcaa
atttaaaatcac-tt------------------ttgtgaa-ttgtagtttaaagg--aaa
ttagtctcacag-caatcgctagttaa-gtattctggaatg-gatcgtcaaggagggtga
aattcccg--tatacactaga--tagaaagctgcaaagaac-ttttatcctacgagtcgt
gttgcttgttaatgcagcattaattgggaggtaaattccttctaaagctaaatataagag
agaga-ccgatagcaaacaagtaccgtgagggaaagatgaaagagaaccctgaaaagggg
actcaaaagaatgtgaaattgtcaaaaggtaagcgctaagaatt---------------g
ttcggaatct--------------------------------------gaatttcaa---
-------ctttgatcagaggaaactctgt--------agttaaaatttgggt--------
--ggctatagcttttgttttgactatcaagaatttt--gggatagagattgtaggcctcg
gc-----------------------------------ttaccttttc-------------
-----------------------------------------------------ttga---
----------------------------------------------acttga----ca-a
ttgactgttgaagcaggagtaaaagtctcac---aaagg---------tgttgatgaggg
gcactttctcttataggcttgc-ctagaggagtcaggaa-ctttatcttcttttttat--
-------------------------------------------gagttcttatagttaga
agg--tt--------------------------ctaagcgtcccgtcttgaaacacggac
caaggagtctaacaaat-atgcaagtatatgggc----gtcaaacctcagatgcgtaatg
aaagtaatttc------aggtagga--tctcg------------caaga-----gtgcac
tatcaaccgaaccttatgg--a-cttgttcataggatttgagtgagagc-----------
------------------------------------------------------------
------------------------------------------------------------
------------------------------------------------------------
------------------------------------------------------------
------------------------------------------------------------
------------------------------------------------------------
------------------------------------------------------------
------------------------------------------------------------
------------------------------------------------------------
------------------------------------------------------------
------------------------------------------------------------
------------------------------------------------------------
------------------------------------------------------------
------------------------------------------------------------
------------------------------------------------------------
------------------------------------------------------------
------------------------------------------------------------
------------------------------------------------------------
------------------------------------------------------------
------------------------------------------------------------
------------------------------------------------------------
------------------------------------------------------------
------------------------------------------------------------
------------------------------------------------------------
------------------------------------------------------------
------------------------------------------------------------
------------------------------------------------------------
------------------------------------------------------------
------------------------------------------------------------
------------------------------------------------------------
------------------------------------------------------------
------------------------------------------------------------
------------------------------------------------------------
------------------------------------------------------------
------------------------------------------------------------
------------------------------------------------------------
------------------------------------------------------------
------------------------------------------------------------
------------------------------------------------------------
------------------------------------------------------------
-----------
>EF392408
------------------------------------------------------------
----------------attcccg--tag-taatggcgaatgaactgggaa--aggctcaa
atttaaaatcac-tt------------------ttgtgaa-ttgtagtttaaagg--aaa
ttagtctcacag-caatcgctagttaa-gtattctggaatg-gatcgtcaaggagggtga
aattcccg--tatacactaga--tagaaagctgcaaagaac-ttttatcctacgagtcgt
gttgcttgttaatgcagcattaattgggaggtaaattccttctaaagctaaatataagag
agaga-ccgatagcaaacaagtaccgtgagggaaagatgaaagagaaccctgaaaagggg
actcaaaagaatgtgaaattgtcaaaaggtaagcgctaagaatt---------------g
ttcggaatct--------------------------------------gaatttcaa---
-------ctttgatcagaggaaactctgt--------agttaaaatttgggt--------
--ggctatagcttttgttttgactatcaagaatttt--gggatagagattgtaggcctcg
gc-----------------------------------ttaccttttc-------------
-----------------------------------------------------ttga---
----------------------------------------------acttga----ca-a
ttgactgttgaagcaggagtaaaagtctcac---aaagg---------tgttgatgaggg
gcactttctcttataggcttgc-ctagaggagtcaggaa-ctttatcttcttttttat--
-------------------------------------------gagttcttatagttaga
agg--tt--------------------------ctaagcgtcccgtcttgaaacacggac
caaggagtctaacaaat-atgcaagtatatgggc----gtcaaacctcagatgcgtaatg
aaagtaatttc------aggtagga--tctcg------------caaga-----gtgcac
tatcaaccgaaccttatgg--a-cttgttcataggatttgagtgagagcatatttgttgg
tacccg-aaagatggtgaa-ctatgcctgaatagggtgaagccagaggaaa-ctct----
----------------ggtggaggctcgta-gcga-------------------------
------------------------------------------------------------
-ttctga-cgtgcaaatcgatcgt-cgaatttgggtata---------------------
------------------------------------------------------------
------------------------------------------------------------
------------------------------------------------------------
------------------------------------------------------------
------------------------------------------------------------
------------------------------------------------------------
------------------------------------------------------------
------------------------------------------------------------
------------------------------------------------------------
------------------------------------------------------------
------------------------------------------------------------
------------------------------------------------------------
------------------------------------------------------------
------------------------------------------------------------
------------------------------------------------------------
------------------------------------------------------------
------------------------------------------------------------
------------------------------------------------------------
------------------------------------------------------------
------------------------------------------------------------
------------------------------------------------------------
------------------------------------------------------------
------------------------------------------------------------
------------------------------------------------------------
------------------------------------------------------------
------------------------------------------------------------
------------------------------------------------------------
------------------------------------------------------------
------------------------------------------------------------
------------------------------------------------------------
------------------------------------------------------------
------------------------------------------------------------
------------------------------------------------------------
------------------------------------------------------------
------------------------------------------------------------
------------------------------------------------------------
-----------
>DQ481224
--------------------------------gaatttaagcatattaataagcggagga
aaagaaactaacaaggattcccg--tag-taatggcgaatgaactgggaa--aggctcaa
atttaaaatcac-tt------------------ttgtgaa-ttgtagtttaaagg--aaa
ttagtctcacag-caatcgctagttaa-gtattctggaatg-gatcgtcaaggagggtga
aattcccg--tatacactaga--tagaaagctgcaaagaac-ttttatcctacgagtcgt
gttgcttgttaatgcagcattaattgggaggtaaattccttctaaagctaaatataagag
agaga-ccgatagcaaacaagtaccgtgagggaaagatgaaagagaaccctgaaaagggg
actcaaaagaatgtgaaattgtcaaaaggtaagcgctaagaatt---------------g
ttcggaatct--------------------------------------gaatttcaa---
-------ctttgatcagaggaaactctgt--------agttaaaatttgggt--------
--ggctatagcttttgttttgactatcaagaatttt--gggatagagattgtaggcctcg
gc-----------------------------------ttaccttttc-------------
-----------------------------------------------------ttga---
----------------------------------------------acttga----ca-a
ttgactgttgaagcaggagtaaaagtctcac---aaagg---------tgttgatgaggg
gcactttctcttataggcttgc-ctagaggagtcaggaa-ctttatcttcttttttat--
-------------------------------------------gagttcttatagttaga
agg--tt--------------------------ctaagcgtcccgtcttgaaacacggac
caaggagtctaacaaat-atgcaagtatatgggc----gtcaaacctcagatgcgtaatg
aaagtaatttc------aggtagga--tctcg------------caaga-----gtgcac
tatcaaccgaaccttatgg--a-cttgttcataggatttgagtgagagc-----------
------------------------------------------------------------
------------------------------------------------------------
------------------------------------------------------------
------------------------------------------------------------
------------------------------------------------------------
------------------------------------------------------------
------------------------------------------------------------
------------------------------------------------------------
------------------------------------------------------------
------------------------------------------------------------
------------------------------------------------------------
------------------------------------------------------------
------------------------------------------------------------
------------------------------------------------------------
------------------------------------------------------------
------------------------------------------------------------
------------------------------------------------------------
------------------------------------------------------------
------------------------------------------------------------
------------------------------------------------------------
------------------------------------------------------------
------------------------------------------------------------
------------------------------------------------------------
------------------------------------------------------------
------------------------------------------------------------
------------------------------------------------------------
------------------------------------------------------------
------------------------------------------------------------
------------------------------------------------------------
------------------------------------------------------------
------------------------------------------------------------
------------------------------------------------------------
------------------------------------------------------------
------------------------------------------------------------
------------------------------------------------------------
------------------------------------------------------------
------------------------------------------------------------
------------------------------------------------------------
------------------------------------------------------------
------------------------------------------------------------
-----------
>DQ481225
--------------------------------gaatttaagcatattaataagcggagga
aaagaaactaacaaggattcccg--tag-taatggcgaatgaactgggaa--aggctcaa
atttaaaatcac-tt------------------ttgtgaa-ttgtagtttaaagg--aaa
ttagtctcacag-caatcgctagttaa-gtattctggaatg-gatcgtcaaggagggtga
aattcccg--tatacactaga--tagaaagctgcaaagaac-ttttatcctacgagtcgt
gttgcttgttaatgcagcattaattgggaggtaaattccttctaaagctaaatataagag
agaga-ccgatagcaaacaagtaccgtgagggaaagatgaaagagaaccctgaaaagggg
actcaaaagaatgtgaaattgtcaaaaggtaagcgctaagaatt---------------g
ttcggaatct--------------------------------------gaatttcaa---
-------cttttatcaggggaaactctgt--------agttaaaatttgggt--------
--ggctatagcttttgttttgactatcaagaatttt--gggatagagattgtaggcttcg
gt-----------------------------------ttaccttttc-------------
-----------------------------------------------------ttga---
----------------------------------------------acttga----ca-a
ttgactgttgaagcaggagtaaaagtctcac---aaagg---------tgttgatgaggg
gcactttctcttataggcttgc-ctagaggagtcaggaa-ctttatcttcttttttat--
-------------------------------------------gagttcttatagttaga
agg--tt--------------------------ctaagcgtcccgtcttgaaacacggac
caaggagtctaacaaat-atgcaggtatatgggc----gtcaaacctc--atgcgtaatg
aaagtaatttc------aggtagga--tctcg------------caaga-----gtgcac
tatcaaccgaaccttatgg--a-cttgttcataggatttgagtgagagc-----------
------------------------------------------------------------
------------------------------------------------------------
------------------------------------------------------------
------------------------------------------------------------
------------------------------------------------------------
------------------------------------------------------------
------------------------------------------------------------
------------------------------------------------------------
------------------------------------------------------------
------------------------------------------------------------
------------------------------------------------------------
------------------------------------------------------------
------------------------------------------------------------
------------------------------------------------------------
------------------------------------------------------------
------------------------------------------------------------
------------------------------------------------------------
------------------------------------------------------------
------------------------------------------------------------
------------------------------------------------------------
------------------------------------------------------------
------------------------------------------------------------
------------------------------------------------------------
------------------------------------------------------------
------------------------------------------------------------
------------------------------------------------------------
------------------------------------------------------------
------------------------------------------------------------
------------------------------------------------------------
------------------------------------------------------------
------------------------------------------------------------
------------------------------------------------------------
------------------------------------------------------------
------------------------------------------------------------
------------------------------------------------------------
------------------------------------------------------------
------------------------------------------------------------
------------------------------------------------------------
------------------------------------------------------------
------------------------------------------------------------
-----------
>DQ481226
--------------------------------gaatttaagcatattaataagcggagga
aaagaaactaacaaggattcctg--tag-taatggcgaatgaactgggaa--aggctcaa
atttaaaatcac-tt------------------ttgtgaa-ttgtagtttaaagg--aaa
ttagtctcacag-caatcgctagttaa-gtattctggaatg-gatcgtcaaggagggtga
aattcccg--tatacactaga--tagaaagctgcaaagaac-ttttatcctacgagtcgt
gttgcttgttaatgcagcattaattgggaggtaaattccttctaaagctaaatataagag
agaga-ccgatagcaaacaagtaccgtgagggaaagatgaaagagaaccctgaaaagggg
actcaaaagaatgtgaaattgtcaaaaggtaagcgctaagaatt---------------g
ttcggaatct--------------------------------------gaatttcaa---
-------cttttatcaggggaaactctgt--------agttaaaatttgggt--------
--ggctatagcttttgttttgactatcaagaatttt--gggatagagattgtaggcttcg
gt-----------------------------------ttaccttttc-------------
-----------------------------------------------------ttga---
----------------------------------------------acttga----ca-a
ttgactgttgaagcaggagtaaaagtctcac---aaagg---------tgttgatgaggg
gcactttctcttataggcttgc-ctagaggagtcaggaa-ctttatcttcttttttat--
-------------------------------------------gagttcttatagttaga
agg--tt--------------------------ctaagcgtcccgtcttgaaacacggac
caaggagtctaacaaat-atgcaggtatatgggc----gtcaaacctc--atgcgtaatg
aaagtaatttc------aggtagga--tctcg------------caaga-----gtgcac
tatcaaccgaaccttatgg--a-cttgttcataggatttgagtgagagc-----------
------------------------------------------------------------
------------------------------------------------------------
------------------------------------------------------------
------------------------------------------------------------
------------------------------------------------------------
------------------------------------------------------------
------------------------------------------------------------
------------------------------------------------------------
------------------------------------------------------------
------------------------------------------------------------
------------------------------------------------------------
------------------------------------------------------------
------------------------------------------------------------
------------------------------------------------------------
------------------------------------------------------------
------------------------------------------------------------
------------------------------------------------------------
------------------------------------------------------------
------------------------------------------------------------
------------------------------------------------------------
------------------------------------------------------------
------------------------------------------------------------
------------------------------------------------------------
------------------------------------------------------------
------------------------------------------------------------
------------------------------------------------------------
------------------------------------------------------------
------------------------------------------------------------
------------------------------------------------------------
------------------------------------------------------------
------------------------------------------------------------
------------------------------------------------------------
------------------------------------------------------------
------------------------------------------------------------
------------------------------------------------------------
------------------------------------------------------------
------------------------------------------------------------
------------------------------------------------------------
------------------------------------------------------------
------------------------------------------------------------
-----------
>DQ273772
acttcatttcaaatcaagcaaggctacccgctgaatttaagcatattaataagcggagga
aaagaaactaacaaggattcccg--tag-taatggcgaatgaactgggaa--aggctcaa
atttaaaatcac-tt------------------ttgtgaa-ttgtagtttaaagg--aaa
ttagtctcacag-caatcgctagttaa-gtattctggaatg-gatcgtcaaggagggtga
aattcccg--tatacactaga--tagaaagctgcaaagaac-ttttatcctacgagtcgt
gttgcttgttaatgcagcattaattgggaggtaaattccttctaaagctaaatataagag
agaga-ccgatagcaaacaagtaccgtgagggaaagatgaaagagaaccctgaaaagggg
actcaaaagaatgtgaaattgtcaaaaggtaagcgctaagaatt---------------g
ttcggaatct--------------------------------------gaatttcaa---
-------cttttatcaggggaaactctgt--------agttaaaatttgggt--------
--ggctatagcttttgttttgactaccaagaatttt--gggatagagattgtaggcttcg
gt-----------------------------------ttaccttttc-------------
-----------------------------------------------------ttga---
----------------------------------------------acttga----ca-a
ttgactgttgaagcaggagtaaaagtctcac---aaagg---------tgttgatgaggg
gcactttctcttataggcttgc-ctagaggagtcaggaa-ctttatcttcttttttat--
-------------------------------------------gagttcttatagttaga
agg--tt--------------------------ctaagcgtcccgtcttgaaacacggac
caaggagtctaacaaat-atgcaagtatatgggc----gtcaaacctcagatgcgtaatg
aaagtaatttc------aggtagga--tctcg------------caaga-----gtgcac
tatcaaccgaaccttatgg--a-cttgttcataggatttgagtgagagcatatttgttgg
tacccg-aaagatggtgaa-ctatgcctgaatagggtgaagccagaggaaa-ctct----
----------------ggtggaggctcgta-gcga-------------------------
------------------------------------------------------------
-ttctga-cgtgcaaatcgatcgt-cgaatttgggtata-ggggcgaaagactaatcgaa
ccatctagtagctggttcctgccgaagtttccctcaggatagcagaaacacgaagtaata
gttttatgtggtaaagcgaatgattagaggccttggggacgtaatgttttcaacctattc
tcaaactttgaatttgtaagaaggtgtggatttcttaattgaatttatgcctttgaataa
atgtgtttctagtgggccatttttggtaagcagaactggcgatgcgggatgaaccggacg
tcgggttaaggtgcctaaatttacgcttatttgacaccacaaaaggtgttagttcatata
gacagcaggacggtggccatggaagttggaatccgctaaggagtgtgtaacaactcacct
gccgaatgaactagccctgaaaatggatggcgcttaagcgtgatacctaaacccggccat
cattaaggattatgtttttaatgatgagtaggcaggcgtggcgattgagatgaagccttg
gggtaacccttggtggatcaattactagtgcagatcttggtggtagtagcaagtattcaa
atgaaacatctgaagactgaagtggggaagggttctgtggtgacattagttgtccacagg
ttattcgatcctaaggtgtaggctaacgctgttcaatgaattgaagaataacttttttgt
caaaggaagagttgttttaatatgatttgacaccgaaagggaatacagttaatattctgt
aaattagatgtaagataaggcggtaacgcggcgagcctggagacattaaaataaatcctg
ggaagagttatcttttctatttaacatagtacctgaccttggaaacagtttaactggaga
taaggttggggaggtggaagagcagcactttttaagtgaggtccggcgtatttattttaa
tccttgaaaatccagaggagcttatataaaatctcacactaagtcgtacccataaccgca
gcaggtcctcaaggtgaacagcctctagttgatagaataatgtagataagggaagtcggc
aaaatagattcgtaacttcggaaaaagaattggctctaaggattgggtggaaattggcac
ttatatacttgtagatatggtggctttgatgatctggttcgctaggttagagaggttgct
tttttacttgttaatttgtgttcaatccacgcttaacaatcaacttagaactggtacgga
caaggggaatctgactgtctaattaaaacatagcattgtgaaggtttgtaataatgttga
cacaatgtgatttctgcccagtgctctgaatgtcaaagtgaagaaattcaaccaagcgcg
ggttaacggcgggagtaactatgactctcttaaggtagccaaatgcctcgtcatctaatt
agtgacgcgcatgaatggattaacgagattcccactgtccctatttactatctagcgaaa
ccacagccaagggaacgggcttggaaaaatcagcggggaaagaagaccctgttgagcttg
actctagtttgacattgtgaaaagacatagagggtgtagaataagtgggagggcttgccc
gacagtgaaataccactacctttatcgtttttttacttacagaattattaattaaggatt
tatctatattttagaagctataaaaatttgttcaggacattgtcaggtggggagtttggc
tggggcggcacatctgttaaataataacgcaggtgtccaaaggggagctcattaggaaca
gaaatcttaagtagaataaaagggtaaaagctctcttgattttgattttcagtgtgaata
caaaccatgaaagtgtggcctatcgatccttttgttacttggaatttaagtcaagagg--
------------------------------------------------------------
------------------------------------------------------------
------------------------------------------------------------
------------------------------------------------------------
------------------------------------------------------------
-----------
>NG_027647
acttcatttcaaatcaagcaaggctacccgctgaatttaagcatattaataagcggagga
aaagaaactaacaaggattcccg--tag-taatggcgaatgaactgggaa--aggctcaa
atttaaaatcac-tt------------------ttgtgaa-ttgtagtttaaagg--aaa
ttagtctcacag-caatcgctagttaa-gtattctggaatg-gatcgtcaaggagggtga
aattcccg--tatacactaga--tagaaagctgcaaagaac-ttttatcctacgagtcgt
gttgcttgttaatgcagcattaattgggaggtaaattccttctaaagctaaatataagag
agaga-ccgatagcaaacaagtaccgtgagggaaagatgaaagagaaccctgaaaagggg
actcaaaagaatgtgaaattgtcaaaaggtaagcgctaagaatt---------------g
ttcggaatct--------------------------------------gaatttcaa---
-------cttttatcaggggaaactctgt--------agttaaaatttgggt--------
--ggctatagcttttgttttgactaccaagaatttt--gggatagagattgtaggcttcg
gt-----------------------------------ttaccttttc-------------
-----------------------------------------------------ttga---
----------------------------------------------acttga----ca-a
ttgactgttgaagcaggagtaaaagtctcac---aaagg---------tgttgatgaggg
gcactttctcttataggcttgc-ctagaggagtcaggaa-ctttatcttcttttttat--
-------------------------------------------gagttcttatagttaga
agg--tt--------------------------ctaagcgtcccgtcttgaaacacggac
caaggagtctaacaaat-atgcaagtatatgggc----gtcaaacctcagatgcgtaatg
aaagtaatttc------aggtagga--tctcg------------caaga-----gtgcac
tatcaaccgaaccttatgg--a-cttgttcataggatttgagtgagagcatatttgttgg
tacccg-aaagatggtgaa-ctatgcctgaatagggtgaagccagaggaaa-ctct----
----------------ggtggaggctcgta-gcga-------------------------
------------------------------------------------------------
-ttctga-cgtgcaaatcgatcgt-cgaatttgggtata-ggggcgaaagactaatcgaa
ccatctagtagctggttcctgccgaagtttccctcaggatagcagaaacacgaagtaata
gttttatgtggtaaagcgaatgattagaggccttggggacgtaatgttttcaacctattc
tcaaactttgaatttgtaagaaggtgtggatttcttaattgaatttatgcctttgaataa
atgtgtttctagtgggccatttttggtaagcagaactggcgatgcgggatgaaccggacg
tcgggttaaggtgcctaaatttacgcttatttgacaccacaaaaggtgttagttcatata
gacagcaggacggtggccatggaagttggaatccgctaaggagtgtgtaacaactcacct
gccgaatgaactagccctgaaaatggatggcgcttaagcgtgatacctaaacccggccat
cattaaggattatgtttttaatgatgagtaggcaggcgtggcgattgagatgaagccttg
gggtaacccttggtggatcaattactagtgcagatcttggtggtagtagcaagtattcaa
atgaaacatctgaagactgaagtggggaagggttctgtggtgacattagttgtccacagg
ttattcgatcctaaggtgtaggctaacgctgttcaatgaattgaagaataacttttttgt
caaaggaagagttgttttaatatgatttgacaccgaaagggaatacagttaatattctgt
aaattagatgtaagataaggcggtaacgcggcgagcctggagacattaaaataaatcctg
ggaagagttatcttttctatttaacatagtacctgaccttggaaacagtttaactggaga
taaggttggggaggtggaagagcagcactttttaagtgaggtccggcgtatttattttaa
tccttgaaaatccagaggagcttatataaaatctcacactaagtcgtacccataaccgca
gcaggtcctcaaggtgaacagcctctagttgatagaataatgtagataagggaagtcggc
aaaatagattcgtaacttcggaaaaagaattggctctaaggattgggtggaaattggcac
ttatatacttgtagatatggtggctttgatgatctggttcgctaggttagagaggttgct
tttttacttgttaatttgtgttcaatccacgcttaacaatcaacttagaactggtacgga
caaggggaatctgactgtctaattaaaacatagcattgtgaaggtttgtaataatgttga
cacaatgtgatttctgcccagtgctctgaatgtcaaagtgaagaaattcaaccaagcgcg
ggttaacggcgggagtaactatgactctcttaaggtagccaaatgcctcgtcatctaatt
agtgacgcgcatgaatggattaacgagattcccactgtccctatttactatctagcgaaa
ccacagccaagggaacgggcttggaaaaatcagcggggaaagaagaccctgttgagcttg
actctagtttgacattgtgaaaagacatagagggtgtagaataagtgggagggcttgccc
gacagtgaaataccactacctttatcgtttttttacttacagaattattaattaaggatt
tatctatattttagaagctataaaaatttgttcaggacattgtcaggtggggagtttggc
tggggcggcacatctgttaaataataacgcaggtgtccaaaggggagctcattaggaaca
gaaatcttaagtagaataaaagggtaaaagctctcttgattttgattttcagtgtgaata
caaaccatgaaagtgtggcctatcgatccttttgttacttggaatttaagtcaagagg--
------------------------------------------------------------
------------------------------------------------------------
------------------------------------------------------------
------------------------------------------------------------
------------------------------------------------------------
-----------
>DQ481229
--------------------------------gaatttaagcatattaataagcggagga
aaagaaactaacaaggattcccg--tag-taatggcgaatgaactgggaa--aggctcaa
atttaaaatcac--t------------------ctgtgaa-ttgtagtttaaagg--aaa
ttagtctcacag-caatcgctagttaa-gtattctggaatg-gatcgtcaaggagggtga
aattcccg--tatacactaga--tagaaagctgcaaagaac-tattatcctatgagtcgt
gttgcttgttaatgcagcattaattgggaggtaaattccttctaaggctaaatataagag
agaga-ccgatagcaaacaagtaccgtgagggaaagatgaaagagaaccctgaaaagggg
actcaaaagaatgtgaaattgtcaaaaggtaagcgctaagaatt---------------g
ttcggaatcc--------------------------------------caaatgtaa---
-------tttt--tcagggtttactctgt--------agtttaatttggggt--------
--ggctatagcttttgttttgactatcaagaatttt--gggatagagattgtaggcctcg
gc-----------------------------------ttaccttttc-------------
-----------------------------------------------------ttga---
----------------------------------------------acttga----ca-a
ttgactgttggagcaggagtaaaagtctcgc---aaagg---------tgttgatggagg
gcactttctcttataggcttgc-ctagaggagtcaggaa-ctttatcttcttttttat--
-------------------------------------------gagttcttatagttaga
agg--tt--------------------------ctaagcgtcccgtcttgaaacacggac
caaggagtctaacaaat-atgcaggtatatgggc----gtgaaacccc--ctgcgtaatg
aaagtaatttc------aggtagga--tctcg------------caaga-----gtgcac
tatcaaccgaaccttatgg--a-cttgttcataggatttgagtgagagc-----------
------------------------------------------------------------
------------------------------------------------------------
------------------------------------------------------------
------------------------------------------------------------
------------------------------------------------------------
------------------------------------------------------------
------------------------------------------------------------
------------------------------------------------------------
------------------------------------------------------------
------------------------------------------------------------
------------------------------------------------------------
------------------------------------------------------------
------------------------------------------------------------
------------------------------------------------------------
------------------------------------------------------------
------------------------------------------------------------
------------------------------------------------------------
------------------------------------------------------------
------------------------------------------------------------
------------------------------------------------------------
------------------------------------------------------------
------------------------------------------------------------
------------------------------------------------------------
------------------------------------------------------------
------------------------------------------------------------
------------------------------------------------------------
------------------------------------------------------------
------------------------------------------------------------
------------------------------------------------------------
------------------------------------------------------------
------------------------------------------------------------
------------------------------------------------------------
------------------------------------------------------------
------------------------------------------------------------
------------------------------------------------------------
------------------------------------------------------------
------------------------------------------------------------
------------------------------------------------------------
------------------------------------------------------------
------------------------------------------------------------
-----------
>DQ481230
--------------------------------gaatttaagcatattaataagcggagga
aaagaaactaacaaggattcccg--tag-taatggcgaatgaactgggaa--aggctcaa
atttaaaatcac--t------------------ttgtgaa-ttgtagtttaaagg--aaa
ttagtctcacag-caatcgctagttaa-gtattctggaatg-gatcgtcaaggagggtga
aattcccg--tatacactaga--tagaaagctgcaaagaac-tattatcctatgagtcgt
gttgcttgttaatgcagcattaattgggaggtaaattccttctaaggctaaatacaagag
agaga-ccgatagcaaacaagtaccgtgagggaaagatgaaagagaaccctgaaaagggg
actcaaaagaatgtgaaattgtcaaaaggtaagcgctaagaatt---------------g
ttcggaatcc--------------------------------------caaatttaa---
-------tttt--tcagggtttactctgt--------agtttaatttggggt--------
--ggctatagcttttgttttgactatcaagaatttt--gggatagagattgtaggcctcg
gc-----------------------------------ttaccttttc-------------
-----------------------------------------------------ttga---
----------------------------------------------acttga----ca-a
ttgactgttggagcaggagtaaaagtctcac---aaaag---------tgttgctggagg
gtactttctcttataggcttgc-ctagaggagtcaggaa-ctttatcttcttttttat--
-------------------------------------------gagttcttatagttaga
agg--tt--------------------------ctaagcgtcccgtcttgaaacacggac
caaggagtctaacaaat-atgcaggtatatgggc----gtgaaacccc--ctgcgtaatg
aaagtaatttc------aggtagga--tctcg------------caaga-----gtgcac
tatcaaccgaaccttatgg--a-tttgttcataggatttgagtgagagc-----------
------------------------------------------------------------
------------------------------------------------------------
------------------------------------------------------------
------------------------------------------------------------
------------------------------------------------------------
------------------------------------------------------------
------------------------------------------------------------
------------------------------------------------------------
------------------------------------------------------------
------------------------------------------------------------
------------------------------------------------------------
------------------------------------------------------------
------------------------------------------------------------
------------------------------------------------------------
------------------------------------------------------------
------------------------------------------------------------
------------------------------------------------------------
------------------------------------------------------------
------------------------------------------------------------
------------------------------------------------------------
------------------------------------------------------------
------------------------------------------------------------
------------------------------------------------------------
------------------------------------------------------------
------------------------------------------------------------
------------------------------------------------------------
------------------------------------------------------------
------------------------------------------------------------
------------------------------------------------------------
------------------------------------------------------------
------------------------------------------------------------
------------------------------------------------------------
------------------------------------------------------------
------------------------------------------------------------
------------------------------------------------------------
------------------------------------------------------------
------------------------------------------------------------
------------------------------------------------------------
------------------------------------------------------------
------------------------------------------------------------
-----------
>GQ285873
------------------------------------------------------------
----------------attcccg--tag-taatggcgaatgaactgggaa--aggctcaa
atttaaaatcac-at------------------tagtgaa-ttgtagtttaaagg--att
ctagtctcacag-taatcactagttaa-gtattctggaatg-gatcttcaaagagggtga
aattcccg--tatttactaga--tagaaagctgcaaagaac-tgttatcctatgagtcgt
gttgcttgttaatgcagcattaatcgggaggtaaattccttctaaggctaaatacaagag
agagt-ccgatagcaaacaagtaccgtgagggaaagatgaaagagaaccctgaaaagggg
actcaaaagaatgtgaaattgtcaaaaggtaagcgctaagaatt---------------g
ttcgaaatct--------------------------------------ggatttaag---
-------caag--gcagggtccgctctatc-------tgattaaatctgggt--------
--ggctatagcttttgttttgactatcaagaatttt--gggatagagattgtaggctttg
gc-----------------------------------ttaccttttc-------------
-----------------------------------------------------ttga---
----------------------------------------------acatta----ta-a
ttgaccgttggagcaagagtaaaagtctcacgaaaagaa---------tttcaataaagg
atactttctctcataggcttga-ctagaggagttaggag-ctttattggtctttttac--
-------------------------------------------gagttcttatagttaga
agg--tt--------------------------ctaagcgtcccgtcttgaaacacggac
caaggagtctaacatrt-atgcaagtatatgggc----atgaaaccccagctgcgtaatg
aaagtaatttc------aggtagga--tcccg------------caagg-----gtgcac
tatcaaccgaactttatgg--a-tttgttcataagatttgagttggagc-----------
------------------------------------------------------------
------------------------------------------------------------
------------------------------------------------------------
------------------------------------------------------------
------------------------------------------------------------
------------------------------------------------------------
------------------------------------------------------------
------------------------------------------------------------
------------------------------------------------------------
------------------------------------------------------------
------------------------------------------------------------
------------------------------------------------------------
------------------------------------------------------------
------------------------------------------------------------
------------------------------------------------------------
------------------------------------------------------------
------------------------------------------------------------
------------------------------------------------------------
------------------------------------------------------------
------------------------------------------------------------
------------------------------------------------------------
------------------------------------------------------------
------------------------------------------------------------
------------------------------------------------------------
------------------------------------------------------------
------------------------------------------------------------
------------------------------------------------------------
------------------------------------------------------------
------------------------------------------------------------
------------------------------------------------------------
------------------------------------------------------------
------------------------------------------------------------
------------------------------------------------------------
------------------------------------------------------------
------------------------------------------------------------
------------------------------------------------------------
------------------------------------------------------------
------------------------------------------------------------
------------------------------------------------------------
------------------------------------------------------------
-----------
>GQ285874
------------------------------------------------------------
----------------attcccg--tag-taatggcgaatgaactgggaa--aggctcaa
atttaaaatcac-at------------------tagtgaa-ttgtagtttaaagg--att
ctagtctcacag-taatcactagttaa-gtattctggaatg-gatcttcaaagagggtga
aattcccg--tatttactaga--tagaaagctgcaaagaac-tgttatcctatgagtcgt
gttgcttgttaatgcagcattaatcgggaggtaaattccttctaaggctaaatacaagag
agagt-ccgatagcaaacaagtaccgtgagggaaagatgaaagagaaccctgaaaagggg
actcaaaagaatgtgaaattgtcaaaaggtaagcgctaagaatt---------------g
ttcgaaatct--------------------------------------ggatttaag---
-------caag--gcagggtccgctctatc-------tgattaaatctgggt--------
--ggctatagcttttgttttgactatcaagaatttt--gggatagagattgtaggctttg
gc-----------------------------------ttaccttttc-------------
-----------------------------------------------------ttga---
----------------------------------------------acatta----ta-a
ttgaccgttggagcaagagtaaaagtctcacgaaaagaa---------tttcaataaagg
atactttctctcataggcttga-ctagaggagttaggag-ctttattggtctttttac--
-------------------------------------------gagttcttatagttaga
agg--tt--------------------------ctaagcgtcccgtcttgaaacacggac
caaggagtctaacatrt-atgcaagtatatgggc----atgaaaccccagctgcgtaatg
aaagtaatttc------aggtagga--tcccg------------caagg-----gtgcac
tatcaaccgaactttatgg--a-tttgttcataagatttgagttggagc-----------
------------------------------------------------------------
------------------------------------------------------------
------------------------------------------------------------
------------------------------------------------------------
------------------------------------------------------------
------------------------------------------------------------
------------------------------------------------------------
------------------------------------------------------------
------------------------------------------------------------
------------------------------------------------------------
------------------------------------------------------------
------------------------------------------------------------
------------------------------------------------------------
------------------------------------------------------------
------------------------------------------------------------
------------------------------------------------------------
------------------------------------------------------------
------------------------------------------------------------
------------------------------------------------------------
------------------------------------------------------------
------------------------------------------------------------
------------------------------------------------------------
------------------------------------------------------------
------------------------------------------------------------
------------------------------------------------------------
------------------------------------------------------------
------------------------------------------------------------
------------------------------------------------------------
------------------------------------------------------------
------------------------------------------------------------
------------------------------------------------------------
------------------------------------------------------------
------------------------------------------------------------
------------------------------------------------------------
------------------------------------------------------------
------------------------------------------------------------
------------------------------------------------------------
------------------------------------------------------------
------------------------------------------------------------
------------------------------------------------------------
-----------
>GQ285875
------------------------------------------------------------
----------------attcccg--tag-taatggcgaatgaactgggaa--aggctcaa
atttaaaatcac-at------------------tagtgaa-ttgtagtttaaagg--att
ctagtctcacag-taatcactagttaa-gtattctggaatg-gatcttcaaagagggtga
aattcccg--tatttactaga--tagaaagctgcaaagaac-tgttatcctatgagtcgt
gttgcttgttaatgcagcattaatcgggaggtaaattccttctaaggctaaatacaagag
agagt-ccgatagcaaacaagtaccgtgagggaaagatgaaagagaaccctgaaaagggg
actcaaaagaatgtgaaattgtcaaaaggtaagcgctaagaatt---------------g
ttcgaaatct--------------------------------------ggatttaag---
-------caag--gcagggtccgctctatc-------tgattaaatctgggt--------
--ggctatagcttttgttttgactatcaagaatttt--gggatagagattgtaggctttg
gc-----------------------------------ttaccttttc-------------
-----------------------------------------------------ttga---
----------------------------------------------acatta----ta-a
ttgaccgttggagcaagagtaaaagtctcacgaaaagaa---------tttcaataaagg
atactttctctcataggcttga-ctagaggagttaggag-ctttattggtctttttac--
-------------------------------------------gagttcttatagttaga
agg--tt--------------------------ctaagcgtcccgtcttgaaacacggac
caaggagtctaacatrt-atgcaagtatatgggc----atgaaaccccagctgcgtaatg
aaagtaatttc------aggtagga--tcccg------------caagg-----gtgcac
tatcaaccgaactttatgg--a-tttgttcataagatttgagttggagc-----------
------------------------------------------------------------
------------------------------------------------------------
------------------------------------------------------------
------------------------------------------------------------
------------------------------------------------------------
------------------------------------------------------------
------------------------------------------------------------
------------------------------------------------------------
------------------------------------------------------------
------------------------------------------------------------
------------------------------------------------------------
------------------------------------------------------------
------------------------------------------------------------
------------------------------------------------------------
------------------------------------------------------------
------------------------------------------------------------
------------------------------------------------------------
------------------------------------------------------------
------------------------------------------------------------
------------------------------------------------------------
------------------------------------------------------------
------------------------------------------------------------
------------------------------------------------------------
------------------------------------------------------------
------------------------------------------------------------
------------------------------------------------------------
------------------------------------------------------------
------------------------------------------------------------
------------------------------------------------------------
------------------------------------------------------------
------------------------------------------------------------
------------------------------------------------------------
------------------------------------------------------------
------------------------------------------------------------
------------------------------------------------------------
------------------------------------------------------------
------------------------------------------------------------
------------------------------------------------------------
------------------------------------------------------------
------------------------------------------------------------
-----------
>GQ285876
------------------------------------------------------------
----------------attcccg--tag-taatggcgaatgaactgggaa--aggctcaa
atttaaaatcac-at------------------tagtgaa-ttgtagtttaaagg--att
ctagtctcacag-taatcactagttaa-gtattctggaatg-gatcttcaaagagggtga
aattcccg--tatttactaga--tagaaagctgcaaagaac-tgttatcctatgagtcgt
gttgcttgttaatgcagcattaatcgggaggtaaattccttctaaggctaaatacaagag
agagt-ccgatagcaaacaagtaccgtgagggaaagatgaaagagaaccctgaaaagggg
actcaaaagaatgtgaaattgtcaaaaggtaagcgctaagaatt---------------g
ttcgaaatct--------------------------------------ggatttaag---
-------caag--gcagggtccgctctatc-------tgattaaatctgggt--------
--ggctatagcttttgttttgactatcaagaatttt--gggatagagattgtaggctttg
gc-----------------------------------ttaccttttc-------------
-----------------------------------------------------ttga---
----------------------------------------------acatta----ta-a
ttgaccgttggagcaagagtaaaagtctcacgaaaagaa---------tttcaataaagg
atactttctctcataggcttga-ctagaggagttaggag-ctttattggtctttttac--
-------------------------------------------gagttcttatagttaga
agg--tt--------------------------ctaagcgtcccgtcttgaaacacggac
caaggagtctaacatrt-atgcaagtatatgggc----atgaaaccccagctgcgtaatg
aaagtaatttc------aggtagga--tcccg------------caagg-----gtgcac
tatcaaccgaactttatgg--a-tttgttcataagatttgagttggagc-----------
------------------------------------------------------------
------------------------------------------------------------
------------------------------------------------------------
------------------------------------------------------------
------------------------------------------------------------
------------------------------------------------------------
------------------------------------------------------------
------------------------------------------------------------
------------------------------------------------------------
------------------------------------------------------------
------------------------------------------------------------
------------------------------------------------------------
------------------------------------------------------------
------------------------------------------------------------
------------------------------------------------------------
------------------------------------------------------------
------------------------------------------------------------
------------------------------------------------------------
------------------------------------------------------------
------------------------------------------------------------
------------------------------------------------------------
------------------------------------------------------------
------------------------------------------------------------
------------------------------------------------------------
------------------------------------------------------------
------------------------------------------------------------
------------------------------------------------------------
------------------------------------------------------------
------------------------------------------------------------
------------------------------------------------------------
------------------------------------------------------------
------------------------------------------------------------
------------------------------------------------------------
------------------------------------------------------------
------------------------------------------------------------
------------------------------------------------------------
------------------------------------------------------------
------------------------------------------------------------
------------------------------------------------------------
------------------------------------------------------------
-----------
>GQ285877
------------------------------------------------------------
----------------attcccg--tag-taatggcgaatgaactgggaa--aggctcaa
atttaaaatcac-at------------------tagtgaa-ttgtagtttaaagg--att
ctagtctcacag-taatcactagttaa-gtattctggaatg-gatcttcaaagagggtga
aattcccg--tatttactaga--tagaaagctgcaaagaac-tgttatcctatgagtcgt
gttgcttgttaatgcagcattaatcgggaggtaaattccttctaaggctaaatacaagag
agagt-ccgatagcaaacaagtaccgtgagggaaagatgaaagagaaccctgaaaagggg
actcaaaagaatgtgaaattgtcaaaaggtaagcgctaagaatt---------------g
ttcgaaatct--------------------------------------ggatttaag---
-------caag--gcagggtccgctctatc-------tgattaaatctgggt--------
--ggctatagcttttgttttgactatcaagaatttt--gggatagagattgtaggctttg
gc-----------------------------------ttaccttttc-------------
-----------------------------------------------------ttga---
----------------------------------------------acatta----ta-a
ttgaccgttggagcaagagtaaaagtctcacgaaaagaa---------tttcaataaagg
atactttctctcataggcttga-ctagaggagttaggag-ctttattggtctttttac--
-------------------------------------------gagttcttatagttaga
agg--tt--------------------------ctaagcgtcccgtcttgaaacacggac
caaggagtctaacatat-atgcaagtatatgggc----atgaaaccccagctgcgtaatg
aaagtaatttc------aggtagga--tcccg------------caagg-----gtgcac
tatcaaccgaactttatgg--a-tttgttcataagatttgagttggagc-----------
------------------------------------------------------------
------------------------------------------------------------
------------------------------------------------------------
------------------------------------------------------------
------------------------------------------------------------
------------------------------------------------------------
------------------------------------------------------------
------------------------------------------------------------
------------------------------------------------------------
------------------------------------------------------------
------------------------------------------------------------
------------------------------------------------------------
------------------------------------------------------------
------------------------------------------------------------
------------------------------------------------------------
------------------------------------------------------------
------------------------------------------------------------
------------------------------------------------------------
------------------------------------------------------------
------------------------------------------------------------
------------------------------------------------------------
------------------------------------------------------------
------------------------------------------------------------
------------------------------------------------------------
------------------------------------------------------------
------------------------------------------------------------
------------------------------------------------------------
------------------------------------------------------------
------------------------------------------------------------
------------------------------------------------------------
------------------------------------------------------------
------------------------------------------------------------
------------------------------------------------------------
------------------------------------------------------------
------------------------------------------------------------
------------------------------------------------------------
------------------------------------------------------------
------------------------------------------------------------
------------------------------------------------------------
------------------------------------------------------------
-----------
>GQ285878
------------------------------------------------------------
----------------attcccg--tag-taatggcgaatgaactgggaa--aggctcaa
atttaaaatcac-at------------------tagtgaa-ttgtagtttaaagg--att
ctagtctcacag-taatcactagttaa-gtattctggaatg-gatcttcaaagagggtga
aattcccg--tatttactaga--tagaaagctgcaaagaac-tgttatcctatgagtcgt
gttgcttgttaatgcagcattaatcgggaggtaaattccttctaaggctaaatacaagag
agagt-ccgatagcaaacaagtaccgtgagggaaagatgaaagagaaccctgaaaagggg
actcaaaagaatgtgaaattgtcaaaaggtaagcgctaagaatt---------------g
ttcgaaatct--------------------------------------ggatttaag---
-------caag--gcagggtccgctctatc-------tgattaaatctgggt--------
--ggctatagcttttgttttgactatcaagaatttt--gggatagagattgtaggctttg
gc-----------------------------------ttaccttttc-------------
-----------------------------------------------------ttga---
----------------------------------------------acatta----ta-a
ttgaccgttggagcaagagtaaaagtctcacgaaaagaa---------tttcaataaagg
atactttctctcataggcttga-ctagaggagttaggag-ctttattggtctttttac--
-------------------------------------------gagttcttatagttaga
agg--tt--------------------------ctaagcgtcccgtcttgaaacacggac
caaggagtctaacatrt-atgcaagtatatgggc----atgaaaccccagctgcgtaatg
aaagtaatttc------aggtagga--tcccg------------caagg-----gtgcac
tatcaaccgaactttatgg--a-tttgttcataagatttgagttggagc-----------
------------------------------------------------------------
------------------------------------------------------------
------------------------------------------------------------
------------------------------------------------------------
------------------------------------------------------------
------------------------------------------------------------
------------------------------------------------------------
------------------------------------------------------------
------------------------------------------------------------
------------------------------------------------------------
------------------------------------------------------------
------------------------------------------------------------
------------------------------------------------------------
------------------------------------------------------------
------------------------------------------------------------
------------------------------------------------------------
------------------------------------------------------------
------------------------------------------------------------
------------------------------------------------------------
------------------------------------------------------------
------------------------------------------------------------
------------------------------------------------------------
------------------------------------------------------------
------------------------------------------------------------
------------------------------------------------------------
------------------------------------------------------------
------------------------------------------------------------
------------------------------------------------------------
------------------------------------------------------------
------------------------------------------------------------
------------------------------------------------------------
------------------------------------------------------------
------------------------------------------------------------
------------------------------------------------------------
------------------------------------------------------------
------------------------------------------------------------
------------------------------------------------------------
------------------------------------------------------------
------------------------------------------------------------
------------------------------------------------------------
-----------
>GQ285879
------------------------------------------------------------
----------------attcccg--tag-taatggcgaatgaactgggaa--aggctcaa
atttaaaatcac-at------------------tagtgaa-ttgtagtttaaagg--att
ctagtctcacag-taatcactagttaa-gtattctggaatg-gatcttcaaagagggtga
aattcccg--tatttactaga--tagaaagctgcaaagaac-tgttatcctatgagtcgt
gttgcttgttaatgcagcattaatcgggaggtaaattccttctaaggctaaatacaagag
agagt-ccgatagcaaacaagtaccgtgagggaaagatgaaagagaaccctgaaaagggg
actcaaaagaatgtgaaattgtcaaaaggtaagcgctaagaatt---------------g
ttcgaaatct--------------------------------------ggatttaag---
-------caag--gcagggtccgctctatc-------tgattaaatctgggt--------
--ggctatagcttttgttttgactatcaagaatttt--gggatagagattgtaggctttg
gc-----------------------------------ttaccttttc-------------
-----------------------------------------------------ttga---
----------------------------------------------acatta----ta-a
ttgaccgttggagcaagagtaaaagtctcacgaaaagaa---------tttcaataaagg
atactttctctcataggcttga-ctagaggagttaggag-ctttattggtctttttac--
-------------------------------------------gagttcttatagttaga
agg--tt--------------------------ctaagcgtcccgtcttgaaacacggac
caaggagtctaacatrt-atgcaagtatatgggc----atgaaaccccagctgcgtaatg
aaagtaatttc------aggtagga--tcccg------------caagg-----gtgcac
tatcaaccgaactttatgg--a-tttgttcataagatttgagttggagc-----------
------------------------------------------------------------
------------------------------------------------------------
------------------------------------------------------------
------------------------------------------------------------
------------------------------------------------------------
------------------------------------------------------------
------------------------------------------------------------
------------------------------------------------------------
------------------------------------------------------------
------------------------------------------------------------
------------------------------------------------------------
------------------------------------------------------------
------------------------------------------------------------
------------------------------------------------------------
------------------------------------------------------------
------------------------------------------------------------
------------------------------------------------------------
------------------------------------------------------------
------------------------------------------------------------
------------------------------------------------------------
------------------------------------------------------------
------------------------------------------------------------
------------------------------------------------------------
------------------------------------------------------------
------------------------------------------------------------
------------------------------------------------------------
------------------------------------------------------------
------------------------------------------------------------
------------------------------------------------------------
------------------------------------------------------------
------------------------------------------------------------
------------------------------------------------------------
------------------------------------------------------------
------------------------------------------------------------
------------------------------------------------------------
------------------------------------------------------------
------------------------------------------------------------
------------------------------------------------------------
------------------------------------------------------------
------------------------------------------------------------
-----------
>GQ285880
------------------------------------------------------------
----------------attcccg--tag-taatggcgaatgaactgggaa--aggctcaa
atttaaaatcac-at------------------tagtgaa-ttgtagtttaaagg--att
ctagtctcacag-taatcactagttaa-gtattctggaatg-gatcttcaaagagggtga
aattcccg--tatttactaga--tagaaagctgcaaagaac-tgttatcctatgagtcgt
gttgcttgttaatgcagcattaatcgggaggtaaattccttctaaggctaaatacaagag
agagt-ccgatagcaaacaagtaccgtgagggaaagatgaaagagaaccctgaaaagggg
actcaaaagaatgtgaaattgtcaaaaggtaagcgctaagaatt---------------g
ttcgaaatct--------------------------------------ggatttaag---
-------caag--gcagggtccgctctatc-------tgattaaatctgggt--------
--ggctatagcttttgttttgactatcaagaatttt--gggatagagattgtaggctttg
gc-----------------------------------ttaccttttc-------------
-----------------------------------------------------ttga---
----------------------------------------------acatta----ta-a
ttgaccgttggagcaagagtaaaagtctcacgaaaagaa---------tttcaataaagg
atactttctctcataggcttga-ctagaggagttaggag-ctttattggtctttttac--
-------------------------------------------gagttcttatagttaga
agg--tt--------------------------ctaagcgtcccgtcttgaaacacggac
caaggagtctaacatrt-atgcaagtatatgggc----atgaaaccccagctgcgtaatg
aaagtaatttc------aggtagga--tcccg------------caagg-----gtgcac
tatcaaccgaactttatgg--a-tttgttcataagatttgagttggagc-----------
------------------------------------------------------------
------------------------------------------------------------
------------------------------------------------------------
------------------------------------------------------------
------------------------------------------------------------
------------------------------------------------------------
------------------------------------------------------------
------------------------------------------------------------
------------------------------------------------------------
------------------------------------------------------------
------------------------------------------------------------
------------------------------------------------------------
------------------------------------------------------------
------------------------------------------------------------
------------------------------------------------------------
------------------------------------------------------------
------------------------------------------------------------
------------------------------------------------------------
------------------------------------------------------------
------------------------------------------------------------
------------------------------------------------------------
------------------------------------------------------------
------------------------------------------------------------
------------------------------------------------------------
------------------------------------------------------------
------------------------------------------------------------
------------------------------------------------------------
------------------------------------------------------------
------------------------------------------------------------
------------------------------------------------------------
------------------------------------------------------------
------------------------------------------------------------
------------------------------------------------------------
------------------------------------------------------------
------------------------------------------------------------
------------------------------------------------------------
------------------------------------------------------------
------------------------------------------------------------
------------------------------------------------------------
------------------------------------------------------------
-----------
>GQ285881
------------------------------------------------------------
----------------attcccg--tag-taatggcgaatgaactgggaa--aggctcaa
atttaaaatcac-at------------------tagtgaa-ttgtagtttaaagg--att
ctagtctcacag-taatcactagttaa-gtattctggaatg-gatcttcaaagagggtga
aattcccg--tatttactaga--tagaaagctgcaaagaac-tgttatcctatgagtcgt
gttgcttgttaatgcagcattaatcgggaggtaaattccttctaaggctaaatacaagag
agagt-ccgatagcaaacaagtaccgtgagggaaagatgaaagagaaccctgaaaagggg
actcaaaagaatgtgaaattgtcaaaaggtaagcgctaagaatt---------------g
ttcgaaatct--------------------------------------ggatttaag---
-------caag--gcagggtccgctctatc-------tgattaaatctgggt--------
--ggctatagcttttgttttgactatcaagaatttt--gggatagagattgtaggctttg
gc-----------------------------------ttaccttttc-------------
-----------------------------------------------------ttga---
----------------------------------------------acatta----ta-a
ttgaccgttggagcaagagtaaaagtctcacgaaaagaa---------tttcaataaagg
atactttctctcataggcttga-ctagaggagttaggag-ctttattggtctttttac--
-------------------------------------------gagttcttatagttaga
agg--tt--------------------------ctaagcgtcccgtcttgaaacacggac
caaggagtctaacatrt-atgcaagtatatgggc----atgaaaccccagctgcgtaatg
aaagtaatttc------aggtagga--tcccg------------caagg-----gtgcac
tatcaaccgaactttatgg--a-tttgttcataagatttgagttggagc-----------
------------------------------------------------------------
------------------------------------------------------------
------------------------------------------------------------
------------------------------------------------------------
------------------------------------------------------------
------------------------------------------------------------
------------------------------------------------------------
------------------------------------------------------------
------------------------------------------------------------
------------------------------------------------------------
------------------------------------------------------------
------------------------------------------------------------
------------------------------------------------------------
------------------------------------------------------------
------------------------------------------------------------
------------------------------------------------------------
------------------------------------------------------------
------------------------------------------------------------
------------------------------------------------------------
------------------------------------------------------------
------------------------------------------------------------
------------------------------------------------------------
------------------------------------------------------------
------------------------------------------------------------
------------------------------------------------------------
------------------------------------------------------------
------------------------------------------------------------
------------------------------------------------------------
------------------------------------------------------------
------------------------------------------------------------
------------------------------------------------------------
------------------------------------------------------------
------------------------------------------------------------
------------------------------------------------------------
------------------------------------------------------------
------------------------------------------------------------
------------------------------------------------------------
------------------------------------------------------------
------------------------------------------------------------
------------------------------------------------------------
-----------
>EF392372
------------------------------------------------------------
-----------------ttcccg--tag-taatggcgaatgaactgggaa--aggctcaa
atttaaaatcac-tc------------------acgtgaa-ttgtagtttataag--att
aaagtctcacag-caaccactgtttaa-gtgctctggaatg-atccgtcatagagggtga
aatccccg--tactgaacaga--gaggaagctgcaaagaac-ttttttctcaagagtcgt
gttgcttgttaatgcagcattaagtgggaggtaaattccttctaaagctaaatattggag
agagc-ccgatagcaaacaagtaccgtgagggaaagatgaaagagaaccctgaaaagggg
actcaaaagaatgtgaaatcgtcaaaagggaagcgctaagaact---------------g
tctggaattc--------------------------------------agatattta---
---------------atagcttgct------------attgaatatttgggt--------
--ggctatag-tcctgtttcgaacttcaggaatctt--gggatagaaattgtaggcttcg
gt-----------------------------------ttaccttttc-------------
-----------------------------------------------------ttga---
----------------------------------------------acttga----tt-t
ctaagatttggggcaggatataaa---ttca---gttgg---------gcaatccatgtg
aaactttattcaatagacttgt-ctagagagtattagaaagcatgtactgttcaacat--
-------------------------------------------caaaatttatagtcaag
agg--tt--------------------------ctaagcgtcccgtcttgaaacacggac
caaggagtctaacataa-atgcaagtataagggt----gataaaccct-aatgcgaaatg
aaagtaatttc------aggtaggaaccccta------------aaaag-----gtgcac
tatcaaccgaacctcatgg--a-tttgttcataggatttgagtaagagcatttatgttgg
tacccg-aaagatggtgaa-ctatgcctgaatagggtgaagccagaggaaa-ctct----
----------------ggtggaagctcgta-gcga-------------------------
------------------------------------------------------------
-ttctga-cgtgcaaatcgatcgt-cgaatttgggtata-ggggc---------------
------------------------------------------------------------
------------------------------------------------------------
------------------------------------------------------------
------------------------------------------------------------
------------------------------------------------------------
------------------------------------------------------------
------------------------------------------------------------
------------------------------------------------------------
------------------------------------------------------------
------------------------------------------------------------
------------------------------------------------------------
------------------------------------------------------------
------------------------------------------------------------
------------------------------------------------------------
------------------------------------------------------------
------------------------------------------------------------
------------------------------------------------------------
------------------------------------------------------------
------------------------------------------------------------
------------------------------------------------------------
------------------------------------------------------------
------------------------------------------------------------
------------------------------------------------------------
------------------------------------------------------------
------------------------------------------------------------
------------------------------------------------------------
------------------------------------------------------------
------------------------------------------------------------
------------------------------------------------------------
------------------------------------------------------------
------------------------------------------------------------
------------------------------------------------------------
------------------------------------------------------------
------------------------------------------------------------
------------------------------------------------------------
------------------------------------------------------------
-----------
>EF392395
------------------------------------------------------------
----------------ttcccgg--tag-taatggcgaatgaactgggaa--aggctcaa
atttaaaatcac-tt------------------acgtgaa-ttgtagtttataag--att
aaagtctcacag-cgaccactgtttaa-gtgctctggaatg-atccgtcatagagggtga
aatccccg--tactaaacaga--gaggaagctgcaaagaactttttttctaaagagtcgt
gttgcttgttaatgcagcattaattgggaggtaaattccttctaaagctaaatattggag
agagt-ccgatagtaaacaagtaccgtgagggaaagatgaaagagaaccctgaaaagggg
actcaaaagaatgtgaaatcgtcaaaaggtaagcgctaagaact---------------g
tctggaattc--------------------------------------aaatattga---
---------------atagcttgct------------attgaatatttgggt--------
--ggctatag-ttctgttttgaactttaggagtctt--gggatagaaattgtaggctttg
gt-----------------------------------ttaccttttc-------------
-----------------------------------------------------ttga---
----------------------------------------------acttga----tt-t
ctgagatttggggcaggatagata---tata---gttgg---------gcaatccatgtg
gaacttaattcaatagacttgt-ctagagagttttaggaagcatgtattattcaacat--
-------------------------------------------caaatattatagtcaag
agg--tt--------------------------ctaagcgtcccgtcttgaaacacggac
caaggagtctaacataa-atgcgagtataagggc----gtcaaaccct-aatgcgaaatg
aaagtaatttc------aggtaggatccccta------------aaaag-----gtgcac
tatcaaccgaaccttatgg--a-cttgttcataggatttgagtaggagcatttatgttgg
tacccg-aaagatggtgaa-ctatgcctgaatagggtgaagccagaggaaa-ctct----
----------------ggtggaagctcgta-gcga-------------------------
------------------------------------------------------------
-ttctga-cgtgcaaatcgatcgt-cgaatttgggtata-ggggc---------------
------------------------------------------------------------
------------------------------------------------------------
------------------------------------------------------------
------------------------------------------------------------
------------------------------------------------------------
------------------------------------------------------------
------------------------------------------------------------
------------------------------------------------------------
------------------------------------------------------------
------------------------------------------------------------
------------------------------------------------------------
------------------------------------------------------------
------------------------------------------------------------
------------------------------------------------------------
------------------------------------------------------------
------------------------------------------------------------
------------------------------------------------------------
------------------------------------------------------------
------------------------------------------------------------
------------------------------------------------------------
------------------------------------------------------------
------------------------------------------------------------
------------------------------------------------------------
------------------------------------------------------------
------------------------------------------------------------
------------------------------------------------------------
------------------------------------------------------------
------------------------------------------------------------
------------------------------------------------------------
------------------------------------------------------------
------------------------------------------------------------
------------------------------------------------------------
------------------------------------------------------------
------------------------------------------------------------
------------------------------------------------------------
------------------------------------------------------------
-----------
>KC146376
-----------------------------------------catattaataagcggagga
aaagaaactaacaaggattccct--tag-taatggcgaatgaaaagggaa--aggctcaa
atttaaaatcac-tc------------------acgtgaa-ttgtagtttataag--ata
aaagtctcacag-caaccactgtccaa-gtgctctggaatg-aaccatcatagagggtga
aattcccg--tactaaacaga--gaggaagctgcaaagaac-tttaatctaacgagtcgt
gttgcttgataatgcagcattaatagggaggtaaattccttctaaagctaaatacaagag
agaga-ccgatagcaaacaagtaccgtgagggaaagatgaaagagaaccctgaaaagggg
actcaaaagaatgtgaaattgtcaaaaggtaagcgctaagaact---------------g
tccgtagttt--------------------------------------ggattttaa---
-------gattg-atggggtttactccgtt-----gaaattaaggttcagat--------
--ggctatagcttttgtctcgacctttaagagcatt--gggataaggattgtaggcttcg
gt-----------------------------------ttacctttct-------------
-----------------------------------------------------ttga---
----------------------------------------------actttg----ct-t
ttaagagttggggcaggatgaaaagtctcat---gctgt---------ggtaaacatgtg
gaactttattcaatagacttgt-ctagagagtattaggaagtatgtttgctacatcaa--
-------------------------------------------gagcacttatagttagg
agg--tt--------------------------ctaagcgtc------------------
------------------------------------------------------------
------------------------------------------------------------
------------------------------------------------------------
------------------------------------------------------------
------------------------------------------------------------
------------------------------------------------------------
------------------------------------------------------------
------------------------------------------------------------
------------------------------------------------------------
------------------------------------------------------------
------------------------------------------------------------
------------------------------------------------------------
------------------------------------------------------------
------------------------------------------------------------
------------------------------------------------------------
------------------------------------------------------------
------------------------------------------------------------
------------------------------------------------------------
------------------------------------------------------------
------------------------------------------------------------
------------------------------------------------------------
------------------------------------------------------------
------------------------------------------------------------
------------------------------------------------------------
------------------------------------------------------------
------------------------------------------------------------
------------------------------------------------------------
------------------------------------------------------------
------------------------------------------------------------
------------------------------------------------------------
------------------------------------------------------------
------------------------------------------------------------
------------------------------------------------------------
------------------------------------------------------------
------------------------------------------------------------
------------------------------------------------------------
------------------------------------------------------------
------------------------------------------------------------
------------------------------------------------------------
------------------------------------------------------------
------------------------------------------------------------
------------------------------------------------------------
------------------------------------------------------------
-----------
>EF392387
------------------------------------------------------------
------------agggattccct--tag-taatggcgaatgaaaagggaa--aggctcaa
atttaaaatcac-tc------------------acgtgaa-ttgtagtttataag--ata
aaagtctcacag-caaccactgtccaa-gtgctctggaatg-aaccatcatagagggtga
aattcccg--tactaaacaga--gaggaagctgcaaagaac-tttaatctaacgagtcgt
gttgcttgataatgcagcattaatagggaggtaaattccttctaaagctaaatacaagag
agaga-ccgatagcaaacaagtaccgtgagggaaagatgaaagagaaccctgaaaagggg
actcaaaagaatgtgaaattgtcaaaaggtaagcgctaagaact---------------g
tccgtagttt--------------------------------------ggattttaa---
-------gattg-atggggtttactccgtt-----gaaattaaggttcagat--------
--ggctatagcttttgtctcgacctttaagagcatt--gggataaggattgtaggcttcg
gt-----------------------------------ttacctttct-------------
-----------------------------------------------------ttga---
----------------------------------------------actttg----ct-t
ttaagagttggggcaggatgaaaagtctcat---gctgt---------ggtaaacatgtg
gaactttattcaatagacttgt-ctagagagtattaggaagtatgtttgctacatcaa--
-------------------------------------------gagcacttatagttagg
agg--tt--------------------------ctaagcgtcccgtcttgaaacacggac
caaggagtctaacattt-atgcaagtatatgggc----gttaaacctcaaatgcgaaatg
aaagtaatttc------aggtagga--tcctg------------caagg-----gtgcac
tatcaaccgaaccttatgg--a-cttgttcataggatttgagtaagagcataaatgttgg
tacccg-aaagatggtgaa-ctatgcctgaatagggtgaagccagaggaaa-ctct----
----------------ggtggaagcttgta-gcga-------------------------
------------------------------------------------------------
-ttctga-cgtgcaaatcgatcgt-cgaatttgggtata-g-------------------
------------------------------------------------------------
------------------------------------------------------------
------------------------------------------------------------
------------------------------------------------------------
------------------------------------------------------------
------------------------------------------------------------
------------------------------------------------------------
------------------------------------------------------------
------------------------------------------------------------
------------------------------------------------------------
------------------------------------------------------------
------------------------------------------------------------
------------------------------------------------------------
------------------------------------------------------------
------------------------------------------------------------
------------------------------------------------------------
------------------------------------------------------------
------------------------------------------------------------
------------------------------------------------------------
------------------------------------------------------------
------------------------------------------------------------
------------------------------------------------------------
------------------------------------------------------------
------------------------------------------------------------
------------------------------------------------------------
------------------------------------------------------------
------------------------------------------------------------
------------------------------------------------------------
------------------------------------------------------------
------------------------------------------------------------
------------------------------------------------------------
------------------------------------------------------------
------------------------------------------------------------
------------------------------------------------------------
------------------------------------------------------------
------------------------------------------------------------
-----------
>EF392396
------------------------------------------------------------
----------------ttccccc--tag-taatggcgaatgaacagggaa--aagcccaa
ctttaaaatcac-t------------tca----cggtgaa-ttgtagtttataag--agt
ctagaactgt-g-ctgccttaccttaa-ttttcttgaaaaa-gggatacaaagagggtga
tatacccg-------ttttgtggtgagtagtagtatggaac-tgttctctaaagagtcat
gttgcttgggaatgcagcataaagtgggaggtaaattccttctaaggctaaatactggta
ggagt-ccgatagtaaacaagtaccttaagggaaagatgaaagagaaccttgaaaagggt
ctcaaa-agaaagtgaaattgttataaggaaaccgcttaaaact----------------
tctggaatct--------------------------------------atatattaa---
--------ttatgggagagcaatctttt-t-----gtcattagtatatgggt--------
--ggctattgctcgggtttgagcttatgaaaattgt-ttgggaaggtaagttgggtttcg
gc-----------------------------------ctagcttctt-------------
-----------------------------------------------------acag---
----------------------------------------------actgagtaattt-t
ctaaagtttgggccagtgtagaaagtcataa---ggtag---------ctagctcttaaa
atacgttttgcaatagacttgtgctagag-----------tgaaatttattttaaggtct
a-------------------------------gtactgctgctatgctttaatagttaag
aag--gc--------------------------ttaagcgacccgtcttgaaacacggac
caaggagtctaacattt-atgcaagtattatggt----gtaaaaaccagagtgcggaatg
aaagtaatttc-----aaggtagga--tcccg------------caagg-----gtgcac
tatcgaccgagctaaaggg--a-ttttttcttttggtttgagtaagagcatatatgttgg
tacccg-aaagatggtgaa-ctatgcctgaatagggtgaagccagggg-aaaccct----
----------------ggtggaagctcgta-gcga-------------------------
------------------------------------------------------------
-ttctga-cgtgcaaatcgatcgt-cgaatttgggtata-g-------------------
------------------------------------------------------------
------------------------------------------------------------
------------------------------------------------------------
------------------------------------------------------------
------------------------------------------------------------
------------------------------------------------------------
------------------------------------------------------------
------------------------------------------------------------
------------------------------------------------------------
------------------------------------------------------------
------------------------------------------------------------
------------------------------------------------------------
------------------------------------------------------------
------------------------------------------------------------
------------------------------------------------------------
------------------------------------------------------------
------------------------------------------------------------
------------------------------------------------------------
------------------------------------------------------------
------------------------------------------------------------
------------------------------------------------------------
------------------------------------------------------------
------------------------------------------------------------
------------------------------------------------------------
------------------------------------------------------------
------------------------------------------------------------
------------------------------------------------------------
------------------------------------------------------------
------------------------------------------------------------
------------------------------------------------------------
------------------------------------------------------------
------------------------------------------------------------
------------------------------------------------------------
------------------------------------------------------------
------------------------------------------------------------
------------------------------------------------------------
-----------
>EF392381
------------------------------------------------------------
----------ccaggtattcctt--tag-taatggcgaatgaacaaggaa--aagcccaa
ctttaaaatcac-t------------taa----ccgtgaa-ttgtagtttataag--agg
gtagaactag-g-ttaccttgctctaa-gtttcttgaaaaa-gagctacaaagagggtga
aatacccg-------ttttggtgcaagtagtaatttggaac-ttaactctaaagagtcat
gttgcttgggaatgcagcataaattgggaggtaaattccttctaaggctaaatactggta
ggagt-ccgatagtaaacaagtaccttaagggaaagatgaaagagaaccttgaaaagggt
ctcaaa-agaaagtgaaattgttataaggaaaccgcttaaaact----------------
tctggaatct--------------------------------------gtgtattaa---
--------ataagggaaagcaatttcct-g-----gactttaatatatgggt--------
--ggctattgctcgggtttgagcttatgagagtctt-gggggaatgtaagttgaatttcg
gt-----------------------------------ttagcttctt-------------
-----------------------------------------------------aaag---
----------------------------------------------accttgagattt-t
ctaaagtttgggccagtgtagaaagtcatat---ggtag---------ctagctcttaat
ttaaagggtgcaatagatttat-ctagag-----------tattttttaagttgaggtct
a-------------------------------gtactgccactgtgctttaatagttaag
aag--gc--------------------------ttaagcgacccgtcttgaaacacggac
caaggagtctaacatgt-atgcaagtattatggt----gtaaaa-ccagactgcgcaatg
aaagtaatttc-----aaggtagga--tcccg------------caagg-----gtgcac
tatcgaccgagctataggg--a-tttttttctatggcttgagtaagagcatatatgttgg
tacccg-aaagatggtgaa-ctatgcctgaatagggtgaagccaggggaaacccct----
----------------ggtggaagctcnta-gcga-------------------------
------------------------------------------------------------
-ttctga-cgtgcaaatcgatcgt-caaatttgggtata-ggggcgaaaga---------
------------------------------------------------------------
------------------------------------------------------------
------------------------------------------------------------
------------------------------------------------------------
------------------------------------------------------------
------------------------------------------------------------
------------------------------------------------------------
------------------------------------------------------------
------------------------------------------------------------
------------------------------------------------------------
------------------------------------------------------------
------------------------------------------------------------
------------------------------------------------------------
------------------------------------------------------------
------------------------------------------------------------
------------------------------------------------------------
------------------------------------------------------------
------------------------------------------------------------
------------------------------------------------------------
------------------------------------------------------------
------------------------------------------------------------
------------------------------------------------------------
------------------------------------------------------------
------------------------------------------------------------
------------------------------------------------------------
------------------------------------------------------------
------------------------------------------------------------
------------------------------------------------------------
------------------------------------------------------------
------------------------------------------------------------
------------------------------------------------------------
------------------------------------------------------------
------------------------------------------------------------
------------------------------------------------------------
------------------------------------------------------------
------------------------------------------------------------
-----------
>JX242601
------------------------------------------------------------
-------------caggattcct--tag-taatggcgaatgaacaaggaa--aagcccaa
ctttaaaatcac-t------------taa----ccgtgaa-ttgtagtttataag--agg
gtagaactag-g-ttaccttgctctaa-gtttcttgaaaaa-gagctacaaagagggtga
aatacccg-------ttttggtgcaagtagtaatttggaac-ttaactctaaagagtcat
gttgcttgggaatgcagcataaattgggaggtaaattccttctaaggctaaatactggta
ggagt-ccgatagtaaacaagtaccttaagggaaagatgaaagagaaccttgaaaagggt
ctcaaa-agaaagtgaaattgttataaggaaaccgcttaaaact----------------
tctggaatct--------------------------------------gtgtattaa---
--------ataagggaaagcaatttcct-g-----gactttaatatatgggt--------
--ggctattgctcgggtttgagcttatgagagtctt-gggggaatgtaagttgaatttcg
gt-----------------------------------ttagcttctt-------------
-----------------------------------------------------aaag---
----------------------------------------------accttgagattt-t
ctaaagtttgggccagtgtagaaagtcatat---ggtag---------ctagctcttaat
ttaaagggtgcaatagatttat-ctagag-----------tattttttaagttgaggtct
a-------------------------------gtactgccactgtgctttaatagttaag
aag--gc--------------------------ttaagcgacccgtcttgaaacacggac
caaggagtctaacatgt-atgcaagtattatggt----gtaaaa-ccagactgcgcaatg
aaagtaatttc-----aaggtagga--tcccg------------caagg-----gtgcac
tatcgaccgagctataggg--a-tttttttctatggcttgagtaagagcatatatgttgg
tacccg-aaagatggtgaa-ctatgcctgaatagggtgaagccaggggaaa-ccct----
----------------ggtggaagctcgta-gcga-------------------------
------------------------------------------------------------
-ttctga-cgtgcaaatcgatcgt-caaatttgggtata-ggggcgaaagactaatcgaa
ccatctagtagctggttcctgcgagtt---------------------------------
------------------------------------------------------------
------------------------------------------------------------
------------------------------------------------------------
------------------------------------------------------------
------------------------------------------------------------
------------------------------------------------------------
------------------------------------------------------------
------------------------------------------------------------
------------------------------------------------------------
------------------------------------------------------------
------------------------------------------------------------
------------------------------------------------------------
------------------------------------------------------------
------------------------------------------------------------
------------------------------------------------------------
------------------------------------------------------------
------------------------------------------------------------
------------------------------------------------------------
------------------------------------------------------------
------------------------------------------------------------
------------------------------------------------------------
------------------------------------------------------------
------------------------------------------------------------
------------------------------------------------------------
------------------------------------------------------------
------------------------------------------------------------
------------------------------------------------------------
------------------------------------------------------------
------------------------------------------------------------
------------------------------------------------------------
------------------------------------------------------------
------------------------------------------------------------
------------------------------------------------------------
------------------------------------------------------------
------------------------------------------------------------
-----------
>EF392397
------------------------------------------------------------
-------------------------tag-taatggcgaatgaacaaggaa--aagcccaa
ctttaaaatcac-t------------taa----ccgtgaa-ttgtagtttataag--agg
gtagaactag-g-ttaccttgctctaa-gtttcttgaaaaa-gagctacaaagagggtga
aatacccg-------ttttggtgcaagtagtaatttggaac-ttaactctaaagagtcat
gttgcttgggaatgcagcataaattgggaggtaaattccttctaaggctaaatactggta
ggagt-ccgatagtaaacaagtaccttaagggaaagatgaaagagaaccttgaaaagggt
ctcaaa-agaaagtgaaattgttataaggaaaccgcttaaaact----------------
tctggaatct--------------------------------------gtgtattaa---
--------ataagggaaagcaatttcct-g-----gactttaatatatgggt--------
--ggctattgctcgggtttgagcttatgagagtctt-gggggaatgtaagttgaatttcg
gt-----------------------------------ttagcttctt-------------
-----------------------------------------------------aaag---
----------------------------------------------accttgagattt-t
ctaaagtttgggccagtgtagaaagtcatat---ggtag---------ctagctcttaat
ttaaagggtgcaatagatttat-ctagag-----------tattttttaagttgaggtct
a-------------------------------gtactgccactgtgctttaatagttaag
aag--gc--------------------------ttaagcgacccgtcttgaaacacggac
caaggagtctaacatgt-atgcaagtattatggt----gtaaaa-ccagactgcgcaatg
aaagtaatttc-----aaggtagga--tcccg------------caagg-----gtgcac
tatcgaccgagctataggg--a-tttttttctatggcttgagtaagagcatatatgttgg
tacccg-aaagatggtgaa-ctatgcctgaatagggtgaagccaggggaaa-ccct----
----------------ggtggaagctcgta-gcga-------------------------
------------------------------------------------------------
-ttctga-cgtgcaaatcgatcgt-caaatttgggtata-ggggcgaaagact-------
------------------------------------------------------------
------------------------------------------------------------
------------------------------------------------------------
------------------------------------------------------------
------------------------------------------------------------
------------------------------------------------------------
------------------------------------------------------------
------------------------------------------------------------
------------------------------------------------------------
------------------------------------------------------------
------------------------------------------------------------
------------------------------------------------------------
------------------------------------------------------------
------------------------------------------------------------
------------------------------------------------------------
------------------------------------------------------------
------------------------------------------------------------
------------------------------------------------------------
------------------------------------------------------------
------------------------------------------------------------
------------------------------------------------------------
------------------------------------------------------------
------------------------------------------------------------
------------------------------------------------------------
------------------------------------------------------------
------------------------------------------------------------
------------------------------------------------------------
------------------------------------------------------------
------------------------------------------------------------
------------------------------------------------------------
------------------------------------------------------------
------------------------------------------------------------
------------------------------------------------------------
------------------------------------------------------------
------------------------------------------------------------
------------------------------------------------------------
-----------
>JN939182
------------------------------------------------------------
----------------gttcccc--tag-taatggcgaatgaacagggaa--aagcccaa
ttttaaaatcac-c------------taa----ccgtgaa-ttgtagtttataag--agt
gtagaactgt-g-ctgccttgccttaa-gtctcttgaaaaa-gagctacagagagggtga
aattcccg-------ttttggtgcaagtagtagtatggaac-ttatctctaaagagtcat
gttgcttgagaatgcagcataaaatgggtggtaaattccatctaaggctaaatactggta
agagt-ccgatagtaaacaagtaccttaagggaaagatgaaagagaaccttgaaaagggt
ctcaaa-agaaagtgaaattgttataaggaaaccgcttaaaact----------------
tctggaatct--------------------------------------gtgcaccag---
-------ttaatgggggagcaatccctt-t-----gctattggtgtatgggt--------
--ggctattgctcgggtttgagcttatgaggattag-aagggaaggtaagttgaatttcg
gt-----------------------------------ttaacttctt-------------
-----------------------------------------------------aaag---
----------------------------------------------cccttttagtct-g
ataaagtttgggccagtgtagaaagtcatac---ggtgg---------ctagctcttgaa
ttaaacactataatagacttgtgctagag-----------tggtttttaatttaaggcct
a-------------------------------gtactgccac-atgctttaatagttaag
aag--ac--------------------------ttaagcgacccgtcttgaaacacggac
caaggagtctaacatat-atgcaagtattatggc----ttaaaa-ccagactgcgcaatg
aaagtaatttc-----aaggtagga--tcccg------------caagg-----gtgcac
tatcgaccgagctataggg--a-tttttttctatggtttgagtaagagcatatatgttgg
tacccg-aaagatggtgaa-ctatgcctgaatagggtgaagccagggg-aaaccct----
----------------ggtggaagctcgta-gcga-------------------------
------------------------------------------------------------
-ttctga-cgtgcaaatcgatcgt-caaatttgggtata-ggggcgaaagactaatcgaa
ccatctagtagctggttcctgccgaagtttccctcaggatagcagaagctcgaagtaata
gttttatgtggtaaagcgaatgattagaggtcttaggtattcaaaatatttaacctattc
tcaaactttgaatgcgtaagacaatcttagtttcttaatgaactaggatattagaat---
------------------------------------------------------------
------------------------------------------------------------
------------------------------------------------------------
------------------------------------------------------------
------------------------------------------------------------
------------------------------------------------------------
------------------------------------------------------------
------------------------------------------------------------
------------------------------------------------------------
------------------------------------------------------------
------------------------------------------------------------
------------------------------------------------------------
------------------------------------------------------------
------------------------------------------------------------
------------------------------------------------------------
------------------------------------------------------------
------------------------------------------------------------
------------------------------------------------------------
------------------------------------------------------------
------------------------------------------------------------
------------------------------------------------------------
------------------------------------------------------------
------------------------------------------------------------
------------------------------------------------------------
------------------------------------------------------------
------------------------------------------------------------
------------------------------------------------------------
------------------------------------------------------------
------------------------------------------------------------
------------------------------------------------------------
------------------------------------------------------------
------------------------------------------------------------
------------------------------------------------------------
-----------
>JX242605
------------------------------------------------------------
-----------------ttcccc--tag-taatggcgaatgaacagggaa--aagcccaa
ttttaaaatcac-c------------taa----ccgtgaa-ttgtagtttataag--agt
gtagaactgt-g-ctgccttgccttaa-gtctcttgaaaaa-gagctacagagagggtga
aattcccg-------ttttggtgcaagtagtagtatggaac-ttatctctaaagagtcat
gttgcttgagaatgcagcataaaatgggtggtaaattccatctaaggctaaatactggta
agagt-ccgatagtaaacaagtaccttaagggaaagatgaaagagaaccttgaaaagggt
ctcaaa-agaaagtgaaattgttataaggaaaccgcttaaaact----------------
tctggaatct--------------------------------------gtgcaccag---
-------ttaatgggggagcaatccctt-t-----gctattggtgtatgggt--------
--ggctattgctcgggtttgagcttatgaggattag-aagggaaggtaagttgaatttcg
gt-----------------------------------ttaacttctt-------------
-----------------------------------------------------aaag---
----------------------------------------------cccttttagtct-g
ataaagtttgggccagtgtagaaagtcatac---ggtgg---------ctagctcttgaa
ttaaacactataatagacttgtgctagag-----------tggtttttaatttaaggcct
a-------------------------------gtactgccac-atgctttaatagttaag
aag--ac--------------------------ttaagcgacccgtcttgaaacacggac
caaggagtctaacatat-atgcaagtattatggc----ttaaaa-ccagactgcgcaatg
aaagtaatttc-----aaggtagga--tcccg------------caagg-----gtgcac
tatcgaccgagctataggg--a-tttttttctatggtttgagtaagagcatatatgttgg
tacccg-aaagatggtgaa-ctatgcctgaatagggtgaagccagggg-aaaccct----
----------------ggtggaagctcgta-gcga-------------------------
------------------------------------------------------------
-ttctga-cgtgcaaatcgatcgt-caaatttgggtata-ggggcgaaagactaatcgaa
ccatctagta--------------------------------------------------
------------------------------------------------------------
------------------------------------------------------------
------------------------------------------------------------
------------------------------------------------------------
------------------------------------------------------------
------------------------------------------------------------
------------------------------------------------------------
------------------------------------------------------------
------------------------------------------------------------
------------------------------------------------------------
------------------------------------------------------------
------------------------------------------------------------
------------------------------------------------------------
------------------------------------------------------------
------------------------------------------------------------
------------------------------------------------------------
------------------------------------------------------------
------------------------------------------------------------
------------------------------------------------------------
------------------------------------------------------------
------------------------------------------------------------
------------------------------------------------------------
------------------------------------------------------------
------------------------------------------------------------
------------------------------------------------------------
------------------------------------------------------------
------------------------------------------------------------
------------------------------------------------------------
------------------------------------------------------------
------------------------------------------------------------
------------------------------------------------------------
------------------------------------------------------------
------------------------------------------------------------
------------------------------------------------------------
------------------------------------------------------------
-----------
>EF392406
------------------------------------------------------------
-------------------cccc--tag-taatggcgaatgaacagggaa--aagcccaa
ttttaaaatcac-c------------taa----ccgtgaa-ttgtagtttataag--agt
gtagaactgt-g-ctgccttgccttaa-gtctcttgaaaaa-gagctacagagagggtga
aattcccg-------ttttggtgcaagtagtagtatggaac-ttatctctaaagagtcat
gttgcttgagaatgcagcataaaatgggtggtaaattccatctaaggctaaatactggta
agagt-ccgatagtaaacaagtaccttaagggaaagatgaaagagaaccttgaaaagggt
ctcaaa-agaaagtgaaattgttataaggaaaccgcttaaaact----------------
tctggaatct--------------------------------------gtgcaccag---
-------ttaatgggggagcaatccctt-t-----gctattggtgtatgggt--------
--ggctattgctcgggtttgagcttatgaggattag-aagggaaggtaagttgaatttcg
gt-----------------------------------ttaacttctt-------------
-----------------------------------------------------aaag---
----------------------------------------------cccttttagtct-g
ataaagtttgggccagtgtagaaagtcatac---ggtgg---------ctagctcttgaa
ttaaacactataatagacttgtgctagag-----------tggtttttaatttaaggcct
a-------------------------------gtactgccac-atgctttaatagttaag
aag--ac--------------------------ttaagcgacccgtcttgaaacacggac
caaggagtctaacatat-atgcaagtattatggc----ttaaaa-ccagactgcgcaatg
aaagtaatttc-----aaggtagga--tcccg------------caagg-----gtgcac
tatcgaccgagctataggg--a-tttttttctatggtttgagtaagagcatatatgttgg
tacccg-aaagatggtgaacctatgcctgaatagggtgaagccagggg-aaaccct----
----------------ggtggaagctcgta-gcga-------------------------
------------------------------------------------------------
-ttctga-cgtgcaaatcgatcgt-caaatttgggtata-ggggcg--------------
------------------------------------------------------------
------------------------------------------------------------
------------------------------------------------------------
------------------------------------------------------------
------------------------------------------------------------
------------------------------------------------------------
------------------------------------------------------------
------------------------------------------------------------
------------------------------------------------------------
------------------------------------------------------------
------------------------------------------------------------
------------------------------------------------------------
------------------------------------------------------------
------------------------------------------------------------
------------------------------------------------------------
------------------------------------------------------------
------------------------------------------------------------
------------------------------------------------------------
------------------------------------------------------------
------------------------------------------------------------
------------------------------------------------------------
------------------------------------------------------------
------------------------------------------------------------
------------------------------------------------------------
------------------------------------------------------------
------------------------------------------------------------
------------------------------------------------------------
------------------------------------------------------------
------------------------------------------------------------
------------------------------------------------------------
------------------------------------------------------------
------------------------------------------------------------
------------------------------------------------------------
------------------------------------------------------------
------------------------------------------------------------
------------------------------------------------------------
-----------
>EF392385
------------------------------------------------------------
-------------------cccc--tag-taatggcgaatgaacagggaa--aagcccaa
ctttaaaatcac-c------------taa----ccgtgaa-ttgtagtttataag--agt
gtagaactgt-g-ctgccttgccttaa-gtctcttgaaaaa-gagctacaaagagggtga
aattcccg-------ttttggcgtaagtagtagtatggaac-ttatctctaaagagtcat
gttgcttgagaatgcagcataaaatgggtggtaaattccatctaaggctaaatactggta
agagt-ccgatagtaaacaagtaccttaagggaaagatgaaagagaaccttgaaaagggt
ctcaaa-agaaagtgaaattgttataaggaaaccgcttaaaact----------------
tctggaatct--------------------------------------gtgcatcag---
-------ttaaagggggagcaattccct-t-----gctactgatgtatgggt--------
--ggctattgctcgggtttgagcttatgaggattag-aagggaaggtaagttgaatttcg
gt-----------------------------------ttaacttctt-------------
-----------------------------------------------------aaag---
----------------------------------------------cccttttagtct-g
ataaagtttgggccagtgtagaaagtcatac---ggtgg---------ctagctcttgaa
ttaaacactacaatagacttgtgctagag-----------tgatgtttgatttgaggcct
a-------------------------------gtactgctac-atgctttaatagttaag
aag--ac--------------------------ttaagcgacccgtcttgaaacacggac
caaggagtctaacatat-atgcaagtattatggt----ttaaaa-ccagactgcgcaatg
aaagtaatttc-----aaggtagga--tcccg------------caagg-----gtgcac
tatcgaccgagctataggg--a-ttcttttctatggtttgagtaagagcatatatgttgg
tacccg-aaagatggtgaa-ctatgcctgaatagggtgaagccagggg-aaaccct----
----------------ggtggaagctcgta-gcga-------------------------
------------------------------------------------------------
-ttctga-cgtgcaaatcgatcgt-caaatttgggtata-ggggcgaaagacta------
------------------------------------------------------------
------------------------------------------------------------
------------------------------------------------------------
------------------------------------------------------------
------------------------------------------------------------
------------------------------------------------------------
------------------------------------------------------------
------------------------------------------------------------
------------------------------------------------------------
------------------------------------------------------------
------------------------------------------------------------
------------------------------------------------------------
------------------------------------------------------------
------------------------------------------------------------
------------------------------------------------------------
------------------------------------------------------------
------------------------------------------------------------
------------------------------------------------------------
------------------------------------------------------------
------------------------------------------------------------
------------------------------------------------------------
------------------------------------------------------------
------------------------------------------------------------
------------------------------------------------------------
------------------------------------------------------------
------------------------------------------------------------
------------------------------------------------------------
------------------------------------------------------------
------------------------------------------------------------
------------------------------------------------------------
------------------------------------------------------------
------------------------------------------------------------
------------------------------------------------------------
------------------------------------------------------------
------------------------------------------------------------
------------------------------------------------------------
-----------
>EF392389
------------------------------------------------------------
-----------ccaggattcccc--tag-taatggcgaatgaacagggaa--aagcccaa
ctttaaaatcac-t------------tta----cggtgaa-ttgtagtttataag--agg
gtagaattgt-g-ctgccttgccttaa-gtttcttgaaaaa-gaactacaaagagggtga
aatacccg-------ttttggtgcaagtagtagtataaaac-ttaactctaaagagtcat
gttgcttgggaatgcagcataaagtgggaggtaaattccttctaaggctaaatactggta
ggagt-ccgatagtaaacaagtaccttaagggaaagatgaaagagaaccttgaaaagggt
ctcaaa-agaaagtgaaattgttataaggaaaccgcttaaaact----------------
tctggaatct--------------------------------------atatattaa---
-------tatatggggaagcaattcttt-t-----gttattaatatatgggt--------
--gactattgctcgggtttgagcttatgaaa-tttt-agagtaaggtaagttggatttcg
gt-----------------------------------ctaacttctt-------------
-----------------------------------------------------atag---
----------------------------------------------gctctaataatt-t
ctaaagtttgggccagtgtagaaagtcatat---ggtag---------ctagctcttgaa
gtaaatcgaataatagatttat-ctagaa-----------ttttatttaatttaaggtct
a-------------------------------gtactgctaa-atgctttaatagttaag
aag--gt--------------------------ttaagcgacccgtcttgaaacacggac
caaggagtctaacatgt-atgcaagtattatggt----gtaaaa-ccagtatgcgcaatg
aaagtaatttc-----aaggtagga--tcccg------------caagg-----gtgcac
tatcgaccgagctaaaggg--a-tttttttctttggtttgagtaagagcatatatgttgg
tacccg-aaagatggtgaa-ctatgcctgaatagggtgaagccagggg-aaaccct----
----------------ggtggaagctcgta-gcga-------------------------
------------------------------------------------------------
-ttctga-cgtgcaaatcgatcgt-caaatttgggtata-ggggcgaaagacta------
------------------------------------------------------------
------------------------------------------------------------
------------------------------------------------------------
------------------------------------------------------------
------------------------------------------------------------
------------------------------------------------------------
------------------------------------------------------------
------------------------------------------------------------
------------------------------------------------------------
------------------------------------------------------------
------------------------------------------------------------
------------------------------------------------------------
------------------------------------------------------------
------------------------------------------------------------
------------------------------------------------------------
------------------------------------------------------------
------------------------------------------------------------
------------------------------------------------------------
------------------------------------------------------------
------------------------------------------------------------
------------------------------------------------------------
------------------------------------------------------------
------------------------------------------------------------
------------------------------------------------------------
------------------------------------------------------------
------------------------------------------------------------
------------------------------------------------------------
------------------------------------------------------------
------------------------------------------------------------
------------------------------------------------------------
------------------------------------------------------------
------------------------------------------------------------
------------------------------------------------------------
------------------------------------------------------------
------------------------------------------------------------
------------------------------------------------------------
-----------
>EF392374
------------------------------------------------------------
-----------accggattcccc--tag-taatggcgaatgaacagggaa--aagcccaa
ctttaaaatcac-t------------tta----cggtgaa-ttgtagtttataag--agg
gtagaattgt-g-ctgccttgccttaa-gtttcttgaaaaa-gaactacaaagagggtga
aatacccg-------ttttggtgcaagtagtagtataaaac-ttaactctaaagagtcat
gttgcttgggaatgcagcataaagtgggaggtaaattccttctaaggctaaatactggta
ggagt-ccgatagtaaacaagtaccttaagggaaagatgaaagagaaccttgaaaagggt
ctcaaa-agaaagtgaaattgttataaggaaaccgcttaaaact----------------
tctggaatct--------------------------------------atatattaa---
-------tatatggggaagcaattcttt-t-----gttattaatatatgggt--------
--gactattgctcgggtttgagcttatgaaa-tttt-agagtaaggtaagttggatttcg
gt-----------------------------------ctaacttctt-------------
-----------------------------------------------------atag---
----------------------------------------------gctctaataatt-t
ctaaagtttgggccagtgtagaaagtcatat---ggtag---------ctagctcttgaa
gtaaatcgaataatagatttat-ctagaa-----------ttttatttaatttaaggtct
a-------------------------------gtactgctaa-atgctttaatagttaag
aag--gt--------------------------ttaagcgacccgtcttgaaacacggac
caaggagtctaacatgt-atgcaagtattatggt----gtaaaa-ccagtatgcgcaatg
aaagtaatttc-----aaggtagga--tcccg------------caagg-----gtgcac
tatcgaccgagctaaaggg--a-tttttttctttggtttgagtaagagcatatatgttgg
tacccg-aaagatggtgaa-ctatgcctgaatagggtgaagccagggg-aaaccct----
----------------ggtggaagctcgta-gcga-------------------------
------------------------------------------------------------
-ttctga-cgtgcaaatcgatcgt-caaatttgggtata-ggggcgaaagacta------
------------------------------------------------------------
------------------------------------------------------------
------------------------------------------------------------
------------------------------------------------------------
------------------------------------------------------------
------------------------------------------------------------
------------------------------------------------------------
------------------------------------------------------------
------------------------------------------------------------
------------------------------------------------------------
------------------------------------------------------------
------------------------------------------------------------
------------------------------------------------------------
------------------------------------------------------------
------------------------------------------------------------
------------------------------------------------------------
------------------------------------------------------------
------------------------------------------------------------
------------------------------------------------------------
------------------------------------------------------------
------------------------------------------------------------
------------------------------------------------------------
------------------------------------------------------------
------------------------------------------------------------
------------------------------------------------------------
------------------------------------------------------------
------------------------------------------------------------
------------------------------------------------------------
------------------------------------------------------------
------------------------------------------------------------
------------------------------------------------------------
------------------------------------------------------------
------------------------------------------------------------
------------------------------------------------------------
------------------------------------------------------------
------------------------------------------------------------
-----------
>EF392407
------------------------------------------------------------
-------------------------tag-taatggcgaatgaacagggaa--aagcccaa
ctttaaaatcac-t------------tta----cggtgaa-ttgtagtttataag--agg
gtagaattgt-g-ctgccttgccttaa-gtttcttgaaaaa-gaactacaaagagggtga
aatacccg-------ttttggtgcaagtagtagtataaaac-ttaactctaaagagtcat
gttgcttgggaatgcagcataaagtgggaggtaaattccttctaaggctaaatactggta
ggagt-ccgatagtaaacaagtaccttaagggaaagatgaaagagaaccttgaaaagggt
ctcaaa-agaaagtgaaattgttataaggaaaccgcttaaaact----------------
tctggaatct--------------------------------------atatattaa---
-------tatatggggaagcaattcttt-t-----gttattaatgtatgggt--------
--gactattgctcgggtttgagcttatgaaa-tttt-agagtaaggtaagttggatttcg
gt-----------------------------------cgaacttctt-------------
-----------------------------------------------------atag---
----------------------------------------------gctctaataatt-t
ctaaagtttgggccagtgtagaaagtcatat---ggtag---------ctagctcttgaa
gtaaatcgaataatagatttat-ctagaa-----------ttttatttaatttaaggtct
a-------------------------------gtactgctaa-atgctttaatagttaag
aag--gt--------------------------ttaagcgacccgtcttgaaacacggac
caaggagtctaacatgt-atgcaagtattatggt----gtaaaa-ccagtatgcgcaatg
aaagtaatttc-----aaggtagga--tcccg------------caagg-----gtgcac
tatcgaccgagctaaaggg--a-tttttttctttggtttgagtaagagcatatatgttgg
tacccg-aaagatggtgaa-ctatgcctgaatagggtgaagccagggg-aaaccct----
----------------ggtggaagctcgta-gcga-------------------------
------------------------------------------------------------
-ttctga-cgtgcaaatcgatcgt-caaatttgggtata-ggggcgaaagacta------
------------------------------------------------------------
------------------------------------------------------------
------------------------------------------------------------
------------------------------------------------------------
------------------------------------------------------------
------------------------------------------------------------
------------------------------------------------------------
------------------------------------------------------------
------------------------------------------------------------
------------------------------------------------------------
------------------------------------------------------------
------------------------------------------------------------
------------------------------------------------------------
------------------------------------------------------------
------------------------------------------------------------
------------------------------------------------------------
------------------------------------------------------------
------------------------------------------------------------
------------------------------------------------------------
------------------------------------------------------------
------------------------------------------------------------
------------------------------------------------------------
------------------------------------------------------------
------------------------------------------------------------
------------------------------------------------------------
------------------------------------------------------------
------------------------------------------------------------
------------------------------------------------------------
------------------------------------------------------------
------------------------------------------------------------
------------------------------------------------------------
------------------------------------------------------------
------------------------------------------------------------
------------------------------------------------------------
------------------------------------------------------------
------------------------------------------------------------
-----------
>JX242602
------------------------------------------------------------
--------ctaaccaggtttccc--tag-taatggcgaatgaacagggaa--aagcccaa
ctttaaaatcac-t------------tta----cggtgaa-ttgtagtttataag--agg
gtagaattgt-g-ctgccttgccttaa-gtttcttgaaaaa-gaactacaaagagggtga
aatacccg-------ttttggtgcaagtagtagtataaaac-ttaactctaaagagtcat
gttgcttgggaatgcagcataaagtgggaggtaaattccttctaaggctaaatactggta
ggagt-ccgatagtaaacaagtaccttaagggaaagatgaaagagaaccttgaaaagggt
ctcaaa-agaaagtgaaattgttataaggaaaccgcttaaaact----------------
tctggaatct--------------------------------------atatattaa---
-------tatatggggaagcaattcttt-t-----gttattaatatatgggt--------
--gactattgctcgggtttgagcttatgaaa-tttt-agagtaaggtaagttggatttcg
gt-----------------------------------ctaacttctt-------------
-----------------------------------------------------atag---
----------------------------------------------gctctaataatt-t
ctaaagtttgggccagtgtagaaagtcatat---ggtag---------ctagctcttgaa
gtaaatcgaataatagatttat-ctagaa-----------ttttatttaatttaaggtct
a-------------------------------gtactgctaa-atgctttaatagttaag
aag--gt--------------------------ttaagcgacccgtcttgaaacacggac
caaggagtctaacatgt-atgcaagtattatggt----gtaaaa-ccagtatgcgcaatg
aaagtaatttc-----aaggtagga--tcccg------------caagg-----gtgcac
tatcgaccgagctaaaggg--a-tttttttctttggtttgagtaagagcatatatgttgg
tacccg-aaagatggtgaa-ctatgcctgaatagggtgaagccagggg-aaaccct----
----------------ggtggaagctcgta-gcga-------------------------
------------------------------------------------------------
-ttctga-cgtgcaaatcgatcgt-caaatttgggtata-ggggcgaaagactaatcgaa
ccatctagtagctggttcctg---------------------------------------
------------------------------------------------------------
------------------------------------------------------------
------------------------------------------------------------
------------------------------------------------------------
------------------------------------------------------------
------------------------------------------------------------
------------------------------------------------------------
------------------------------------------------------------
------------------------------------------------------------
------------------------------------------------------------
------------------------------------------------------------
------------------------------------------------------------
------------------------------------------------------------
------------------------------------------------------------
------------------------------------------------------------
------------------------------------------------------------
------------------------------------------------------------
------------------------------------------------------------
------------------------------------------------------------
------------------------------------------------------------
------------------------------------------------------------
------------------------------------------------------------
------------------------------------------------------------
------------------------------------------------------------
------------------------------------------------------------
------------------------------------------------------------
------------------------------------------------------------
------------------------------------------------------------
------------------------------------------------------------
------------------------------------------------------------
------------------------------------------------------------
------------------------------------------------------------
------------------------------------------------------------
------------------------------------------------------------
------------------------------------------------------------
-----------
>EF392388
------------------------------------------------------------
-------------gggattcccc--tag-taatggcgaatgaacagggaa--aagcccaa
ctttaaaatcac-t------------tta----cggtgaa-ttgtagtttataag--agg
gtagaattgt-g-ctgccttgccttaa-gtttcttgaaaaa-gaactacaaagagggtga
aatacccg-------ttttggtgcaagtagtagtataaaac-ttaactctaaagagtcat
gttgcttgggaatgcagcataaagtgggaggtaaattccttctaaggctaaatactggta
ggagt-ccgatagtaaacaagtaccttaagggaaagatgaaagagaaccttgaaaagggt
ctcaaa-agaaagtgaaattgttataaggaaaccgcttaaaact----------------
tctggaatct--------------------------------------atatattaa---
-------tatatggggaagcaattcctt-t-----gttattaatgtatgggt--------
--gactattgctcgggtttgagcttatgaaa-tttt-agagtaaggtaagttggatttcg
gt-----------------------------------ctaacttctt-------------
-----------------------------------------------------atag---
----------------------------------------------gctctaataatt-t
ctaaagtttgggccagtgtagaaagtcatat---ggtag---------ctagctcttagc
gtaaatcgaataatagatttat-ctagaa-----------ttttatttatattaaggtct
a-------------------------------gtactgctaa-atgctttaatagttaag
aag--gt--------------------------ttaagcgacccgtcttgaaacacggac
caaggagtctaacatgt-atgcaagtattatggt----gtaaaa-ccagtatgcgcaatg
aaagtaatttc-----aaggtagga--tcccg------------ttagg-----gtgcac
tatcgaccgagctaaaggg--a-tttttttctttggtttgagtaagagcatatatgttgg
tacccg-aaagatggtgaacctatgcctgaatagggtgaagccagggg-aaaccct----
----------------ggtggaagctcgta-gcga-------------------------
------------------------------------------------------------
-ttctga-cgtgcaaatcgatcgt-caaatttgggtata-ggg-----------------
------------------------------------------------------------
------------------------------------------------------------
------------------------------------------------------------
------------------------------------------------------------
------------------------------------------------------------
------------------------------------------------------------
------------------------------------------------------------
------------------------------------------------------------
------------------------------------------------------------
------------------------------------------------------------
------------------------------------------------------------
------------------------------------------------------------
------------------------------------------------------------
------------------------------------------------------------
------------------------------------------------------------
------------------------------------------------------------
------------------------------------------------------------
------------------------------------------------------------
------------------------------------------------------------
------------------------------------------------------------
------------------------------------------------------------
------------------------------------------------------------
------------------------------------------------------------
------------------------------------------------------------
------------------------------------------------------------
------------------------------------------------------------
------------------------------------------------------------
------------------------------------------------------------
------------------------------------------------------------
------------------------------------------------------------
------------------------------------------------------------
------------------------------------------------------------
------------------------------------------------------------
------------------------------------------------------------
------------------------------------------------------------
------------------------------------------------------------
-----------
>EF392394
------------------------------------------------------------
--------------ggattcccc--tag-taatggcgaatgaacagggaa--aagcccaa
ctttaaaatcac-t------------tta----cggtgaa-ttgtagtttataag--agg
gtagaactat-a-ctgccttgccttaa-gtttcttgaaaaa-gaactacaaagagggtga
aatacccg-------ttttggtgcaagtagtagtatagaac-ttaactctaaagagtcat
gttgcttgggaatgcagcataaattgggaggtaaattccttctaaggctaaatactggta
ggagt-ccgatagcaaacaagtaccttaagggaaagatgaaagagaaccttgaaaagggt
ctcaaa-agaaagtgaaattgttataaggaaaccgcttaaaact----------------
tctggaatct--------------------------------------atatattaa---
-------tatatggggaagcaattctct-t-----gttattaatatgtgggt--------
--gactattgctcgggtttaagcttatgaaa-tttt-agaggaaggtaagttggatttcg
gt-----------------------------------ctaacttctt-------------
-----------------------------------------------------atag---
----------------------------------------------actctgataatt-t
ctaaagtttgggccagtgtagaaagtcatat---ggtag---------ctagctcttggt
gtaaataaaacaatagatttat-ctagcg-----------ttttatttatattaaggtct
a-------------------------------gtactgctaa-atgctttaatagttaag
aag--gt--------------------------ttaagcgacccgtcttgaaacacggac
caaggagtctaacatgt-atgcaagtattatggt----gtaaaa-ccagtatgcgcaatg
aaagtaatttc-----aaggtagga--tcccg------------caagg-----gtgcac
tatcgaccgagctaaaggg--a-ttttttcctttggtttgagtaagagcatatatgttgg
tacccg-aaagatggtgaacctatgcctgaatagggtgaagccaggggaaaaccct----
----------------ggtggaagctcgta-gcga-------------------------
------------------------------------------------------------
-ttctga-cgtgcaaatcgatcgt-caaatttgggtata-ggggcgaaagacta------
------------------------------------------------------------
------------------------------------------------------------
------------------------------------------------------------
------------------------------------------------------------
------------------------------------------------------------
------------------------------------------------------------
------------------------------------------------------------
------------------------------------------------------------
------------------------------------------------------------
------------------------------------------------------------
------------------------------------------------------------
------------------------------------------------------------
------------------------------------------------------------
------------------------------------------------------------
------------------------------------------------------------
------------------------------------------------------------
------------------------------------------------------------
------------------------------------------------------------
------------------------------------------------------------
------------------------------------------------------------
------------------------------------------------------------
------------------------------------------------------------
------------------------------------------------------------
------------------------------------------------------------
------------------------------------------------------------
------------------------------------------------------------
------------------------------------------------------------
------------------------------------------------------------
------------------------------------------------------------
------------------------------------------------------------
------------------------------------------------------------
------------------------------------------------------------
------------------------------------------------------------
------------------------------------------------------------
------------------------------------------------------------
------------------------------------------------------------
-----------
>EF392391
------------------------------------------------------------
----------------attcccc--tag-taatggcgaatgaacagggaa--aagcccaa
ctttaaaatcac-t------------tta----cggtgaa-ttgtagtttataag--agg
gtagaactat-g-ctaccttgccttaa-gtttcttgaaaaa-gaactacaaagagggtga
aatacccg-------ttttggtgcaagtagtagtatagaac-ttaactctaaagagtcat
gttgcttgggaatgcagcataaattgggaggtaaattccttctaaggctaaatactggta
agagt-ccgatagcaaacaagtaccttaagggaaagatgaaagagaaccttgaaaagggt
ctcaaa-agaaagtgaaattgttataaggaaaccgcttaaaact----------------
tctggaatct--------------------------------------atatattaa---
-------tatatggggaagcaattcttt-t-----gttattaatatatgggt--------
--gactattgctcgggtttgagcttatgaaa-tttt-agaggaaggtaagttggattttg
gt-----------------------------------ctaacttctt-------------
-----------------------------------------------------acag---
----------------------------------------------actctgataatt-t
ctaaagtttgggccagtgtagaaagtcatat---ggtag---------ctagctcttggt
ttaaataaaataatagatttat-ctagcg-----------tattatttacattaaggtct
a-------------------------------gtactgctaa-atgctttaatagttaag
aag--gt--------------------------ttaagcgacccgtcttgaaacacggac
caaggagtctaacatgt-atgcaagtattatggt----gtaaaa-ccagtatgcgcaatg
aaagtaatttc-----aaggtagga--tcccg------------caagg-----gtgcac
tatcgaccgagctaaaggg--a-tttttttctttggtttgagtaagagcatatatgttgg
tacccg-aaagatggtgaa-ctatgcctgaatagggtgaagccagggg-aaaccct----
----------------ggtggaagctcgta-gcga-------------------------
------------------------------------------------------------
-ttctga-cgtgcaaatcgatcgt-caaatttgggtata-ggggcgaaagacta------
------------------------------------------------------------
------------------------------------------------------------
------------------------------------------------------------
------------------------------------------------------------
------------------------------------------------------------
------------------------------------------------------------
------------------------------------------------------------
------------------------------------------------------------
------------------------------------------------------------
------------------------------------------------------------
------------------------------------------------------------
------------------------------------------------------------
------------------------------------------------------------
------------------------------------------------------------
------------------------------------------------------------
------------------------------------------------------------
------------------------------------------------------------
------------------------------------------------------------
------------------------------------------------------------
------------------------------------------------------------
------------------------------------------------------------
------------------------------------------------------------
------------------------------------------------------------
------------------------------------------------------------
------------------------------------------------------------
------------------------------------------------------------
------------------------------------------------------------
------------------------------------------------------------
------------------------------------------------------------
------------------------------------------------------------
------------------------------------------------------------
------------------------------------------------------------
------------------------------------------------------------
------------------------------------------------------------
------------------------------------------------------------
------------------------------------------------------------
-----------
>JX242603
------------------------------------------------------------
-----aactaaccaggattcccc--tag-taatggcgaatgaacagggaa--aagcccaa
ctttaaaatcac-t------------tta----cggtgaa-ttgtagtttataag--agg
gtagaactat-g-ctaccttgccttaa-gtttcttgaaaaa-gaactacaaagagggtga
aatacccg-------ttttggtgcaagtagtagtatagaac-ttaactctaaagagtcat
gttgcttgggaatgcagcataaattgggaggtaaattccttctaaggctaaatactggta
agagt-ccgatagcaaacaagtaccttaagggaaagatgaaagagaaccttgaaaagggt
ctcaaa-agaaagtgaaattgttataaggaaaccgcttaaaact----------------
tctggaatct--------------------------------------atatattaa---
-------tatatggggaagcaattcttt-t-----gttattaatatatgggt--------
--gactattgctcgggtttgagcttatgaaa-tttt-agaggaaggtaagttggattttg
gt-----------------------------------ctaacttctt-------------
-----------------------------------------------------acag---
----------------------------------------------actctgataatt-t
ctaaagtttgggccagtgtagaaagtcatat---ggtag---------ctagctcttggt
ttaaataaaataatagatttat-ctagcg-----------tattatttacattaaggtct
a-------------------------------gtactgctaa-atgctttaatagttaag
aag--gt--------------------------ttaagcgacccgtcttgaaacacggac
caaggagtctaacatgt-atgcaagtattatggt----gtaaaa-ccagtatgcgcaatg
aaagtaatttc-----aaggtagga--tcccg------------caagg-----gtgcac
tatcgaccgagctaaaggg--a-tttttttctttggtttgagtaagagcatatatgttgg
tacccg-aaagatggtgaa-ctatgcctgaatagggtgaagccagggg-aaaccct----
----------------ggtggaagctcgta-gcga-------------------------
------------------------------------------------------------
-ttctga-cgtgcaaatcgatcgt-caaatttgggtata-ggggcgaaagactaatcgaa
ccatctagtagctggttcctgccgaagtttccctcaggatagcagaagctcgaagtaata
gttttatgtggtaaagcgaatgattagaggccttaggtattcaaaatatttaacctattc
tcaaactttgaatgcgtaagacaattttagtttcttaatgaactaagatattagaat---
------------------------------------------------------------
------------------------------------------------------------
------------------------------------------------------------
------------------------------------------------------------
------------------------------------------------------------
------------------------------------------------------------
------------------------------------------------------------
------------------------------------------------------------
------------------------------------------------------------
------------------------------------------------------------
------------------------------------------------------------
------------------------------------------------------------
------------------------------------------------------------
------------------------------------------------------------
------------------------------------------------------------
------------------------------------------------------------
------------------------------------------------------------
------------------------------------------------------------
------------------------------------------------------------
------------------------------------------------------------
------------------------------------------------------------
------------------------------------------------------------
------------------------------------------------------------
------------------------------------------------------------
------------------------------------------------------------
------------------------------------------------------------
------------------------------------------------------------
------------------------------------------------------------
------------------------------------------------------------
------------------------------------------------------------
------------------------------------------------------------
------------------------------------------------------------
------------------------------------------------------------
-----------
>EF392405
------------------------------------------------------------
----agactaccagggattcccc--tag-taatggcgaatgaacagggaa--aagcccaa
ctttaaaatcac-t------------tta----cggtgaa-ttgtagtttataag--agg
gtagaactat-g-ctgccttgccttaa-gtttcttgaaaaa-gaactacagagagggtga
aatacccg-------ttttggtgcaagtagtagtatagaac-ttaactctaaagagtcat
gttgcttgggaatgcagcataaagtgggaggtaaattccttctaaggctaaatactggta
ggagc-ccgatagtaaacaagtaccttaagggaaagatgaaagagaaccttgaaaagggt
ctcaaa-agaaagtgaaattgttataaggaaagcgcttaaaact----------------
tctggaatct--------------------------------------atatattaa---
-------tatatggggaagcaattctct-t-----gttattaatatgtgggt--------
--gactattgctcgggtttgagcttatgaaattttt-aaagtaaggtaagttggatttcg
gt-----------------------------------ctaacttctt-------------
-----------------------------------------------------acag---
----------------------------------------------actttttaaatt-t
ctaaagtttgggccagtgtagaaagtcatat---ggtag---------ctagctcttgac
ataaatagaataatagatttat-ctagcg-----------ttttgtttgttttaaggtct
a-------------------------------gtactgctaa-atgctttaatagttaag
aag--gt--------------------------ttaagcgacccgtcttgaaacacggac
caaggagtctaacatgt-atgcaagtattatggt----gtaaaa-ccagtatgcacaatg
aaagtaatttc-----aaggtagga--tcccg------------caagg-----gtgcac
tatcgaccgagctaaagag--a-tttttttctttggtttgagtaagagcatatatgttgg
tacccg-aaagatggtgaa-ctatgcctgaatagggtgaagccagggg-aaaccct----
----------------ggtggaagctcgta-gcga-------------------------
------------------------------------------------------------
-ttctga-cgtgcaaatcgatcgt-caaattt----------------------------
------------------------------------------------------------
------------------------------------------------------------
------------------------------------------------------------
------------------------------------------------------------
------------------------------------------------------------
------------------------------------------------------------
------------------------------------------------------------
------------------------------------------------------------
------------------------------------------------------------
------------------------------------------------------------
------------------------------------------------------------
------------------------------------------------------------
------------------------------------------------------------
------------------------------------------------------------
------------------------------------------------------------
------------------------------------------------------------
------------------------------------------------------------
------------------------------------------------------------
------------------------------------------------------------
------------------------------------------------------------
------------------------------------------------------------
------------------------------------------------------------
------------------------------------------------------------
------------------------------------------------------------
------------------------------------------------------------
------------------------------------------------------------
------------------------------------------------------------
------------------------------------------------------------
------------------------------------------------------------
------------------------------------------------------------
------------------------------------------------------------
------------------------------------------------------------
------------------------------------------------------------
------------------------------------------------------------
------------------------------------------------------------
------------------------------------------------------------
-----------
>EF39239
------------------------------------------------------------
-----------ccaggattccct--tag-taatggcgaatgaacagggaa--aagcccaa
ttttaaaatcac-t------------tta----cggtgaa-ttgtagtttataag--agg
gtagaactat-g-ctgccttgccttaa-gtttcttgaaaaa-gaactacaaagagggtga
aatacccg-------ttttgttgtaagtagtagtatagaac-ttaactctaaagagtcat
gttgcttgggaatgcagcataaattgggaggtaaattccttctaaggctaaatactggta
ggagt-ccgatagcaaacaagtaccttaagggaaagatgaaagagaaccttgaaaagggt
ctcaaa-agaaagtgaaattgttataaggaaaccgcttaaaact----------------
tgtataatcg--------------------------------------gtttaataa---
-------tatatagggaagcaattcttt-t-----attattattttatgggt--------
--gactattgctcaggtttgagcttataaa--tttt-agaggaaggtaagttggatttcg
gt-----------------------------------ctaacttctt-------------
-----------------------------------------------------acag---
----------------------------------------------actctggtaatt-t
ttaaagtttgggccagtatagaaagtcatat---ggtag---------ctagctcttggt
ataaataaaataatagatttat-ctagca-----------ttttatttatattaaggtct
a-------------------------------gtactgctaa-atgctttaatagttaaa
aag--gt--------------------------ttaagcgacccgtcttgaaacacggac
caaggagtctaacatat-atgcaagtattatggt----ataaaa-ctaatatgcgcaatg
aaagtaatttt-----aaggtagga--tcctg------------caagg-----gtgcac
tatcaaccgagctaaaggg--attttttttctttggtttgagtaagagcatatatgttgg
tacccg-aaagatggtgaa-ctatgcctgaatagggtgaagccagggg-aaaccct----
----------------ggtggaagctcgta-gcga-------------------------
------------------------------------------------------------
-ttctga-cgtgcaaatcgatcgt-caaatttgggtata-ggggcgaaagact-------
------------------------------------------------------------
------------------------------------------------------------
------------------------------------------------------------
------------------------------------------------------------
------------------------------------------------------------
------------------------------------------------------------
------------------------------------------------------------
------------------------------------------------------------
------------------------------------------------------------
------------------------------------------------------------
------------------------------------------------------------
------------------------------------------------------------
------------------------------------------------------------
------------------------------------------------------------
------------------------------------------------------------
------------------------------------------------------------
------------------------------------------------------------
------------------------------------------------------------
------------------------------------------------------------
------------------------------------------------------------
------------------------------------------------------------
------------------------------------------------------------
------------------------------------------------------------
------------------------------------------------------------
------------------------------------------------------------
------------------------------------------------------------
------------------------------------------------------------
------------------------------------------------------------
------------------------------------------------------------
------------------------------------------------------------
------------------------------------------------------------
------------------------------------------------------------
------------------------------------------------------------
------------------------------------------------------------
------------------------------------------------------------
------------------------------------------------------------
-----------
>EF392379
------------------------------------------------------------
---------------gattcccc--tag-taatggcgaatgaacagggaa--cagcccaa
ctttaaaatcac-c------------taa----ccgtgaa-ttgtagtttataag--agg
gtagaactgt-g-cagccttgccttaa-gtctcttggaaaa-gagctacaaagagggtga
aatacccg-------ttttggagcaagtagtagtatggaac-ttaactctaaagagtcat
gttgcttgagaatgcagcataaaatgggtggtaaattccatctaaggctaaatactggta
ggaga-ccgatagtaaacaagtaccttaagggaaagatgaaagagaaccttgaaaagggt
ctcaaa-agaaagtgaaattgttataaggaaaccgcttaaaact----------------
tctagagtgt--------------------------------------gtgcaccaa---
-------tttaaaggggagccatcccat-t-----tgtattggtgtataggc--------
--ggctactgctcaggtttaagcttatgaggactag-agggcaaggtaaactgagccttg
gt-----------------------------------tcaatttctt-------------
-----------------------------------------------------acag---
----------------------------------------------gccttctagccc-t
ttagagtttgggccagtgtataaagtcatga---ggcag---------ctagcccatggt
tcaaatgttgtaatagacatgtgctagag-----------taatgtttaaaccttggcct
a-------------------------------gtactgctag-atgctttagtagccaag
aag--ac--------------------------ttaagcgacccgtcttgaaacacggac
caaggagtctaacatat-atgcaagtattgtggt----gacaaa-ccacagtgcacaatg
aaagtaatttc-----aaggtagga--acct-------------tgaag-----gtgcac
tatcaaccgagctataggg--a-atctttcctatggtttgagtaagagcagacatgttgg
tacccg-aaagatggtgaa-ctatgcctgaatagggtgaagccaggggaaa-ccct----
----------------ggtggaagcccgta-gcga-------------------------
------------------------------------------------------------
-ttctga-cgtgcaaatcgatcgt-caaatttgggtata-ggggcgaaagactaat----
------------------------------------------------------------
------------------------------------------------------------
------------------------------------------------------------
------------------------------------------------------------
------------------------------------------------------------
------------------------------------------------------------
------------------------------------------------------------
------------------------------------------------------------
------------------------------------------------------------
------------------------------------------------------------
------------------------------------------------------------
------------------------------------------------------------
------------------------------------------------------------
------------------------------------------------------------
------------------------------------------------------------
------------------------------------------------------------
------------------------------------------------------------
------------------------------------------------------------
------------------------------------------------------------
------------------------------------------------------------
------------------------------------------------------------
------------------------------------------------------------
------------------------------------------------------------
------------------------------------------------------------
------------------------------------------------------------
------------------------------------------------------------
------------------------------------------------------------
------------------------------------------------------------
------------------------------------------------------------
------------------------------------------------------------
------------------------------------------------------------
------------------------------------------------------------
------------------------------------------------------------
------------------------------------------------------------
------------------------------------------------------------
------------------------------------------------------------
-----------
>EF392402
------------------------------------------------------------
---------------gattcccc--tag-taatggcgaatgaacagggaa--aagcccga
ctttaaaatcac-ct-----------taa----ccgtgaa-ttgtagtttataag--agg
gtagaactgt-g-ctgccttgccttaa-gtctcttgaaaaa-gagctacaaagagggtga
catgcccg-------ttttggagcaagtagtggtataggac-ttaactctaaagagtcat
gttgcttgagaatgcagcataaaatgggtggtaaattccatctaaggctaaatactggta
agaga-ccgatagtaaacaagtaccttaagggaaagatgaaagagaaccttgaaaagggg
ctcaaa-agaaagtgaaattgttataaggaaaccgcttaaaact----------------
tctggagtct--------------------------------------atgcaccca---
-------ttagagggggagccatcctct-t-----tgtatgggtgtatgggt--------
--agctattgctcaggtctgagcttatgagggctag-aggggaaggtagattgagccttg
gc-----------------------------------ttgatttctt-------------
-----------------------------------------------------acag---
----------------------------------------------accctttagccc-t
ttaaagtttgggccagtgtagaaagtcatga---ggcag---------ctagctctttgt
ttgaatggtgcaatagacttgtgctagag-----------tgctgttttgatgttggcct
a-------------------------------gtactgctga-atgctttaatagctaag
gag--ag--------------------------ttaagcgacccgtcttgaaacacggac
caaggagtctaacatat-atgcaagtattatggc----atgaagcccagactgcgcaatg
aaagtgatttc-----aaggtagga--tcctg------------caaag-----gtgcac
tatcgaccgagctataggg--a-ttcttttctatggtttgagtaagagcacatatgttgg
tacccg-aaagatggtgaa-ctatgcctgaatagggtgaagccaggggaaatccct----
----------------ggtggaagctcgta-gcga-------------------------
------------------------------------------------------------
-ttctga-cgtgcaaatcgatcgt-caaatttgggtata-ggggcgaaagacta------
------------------------------------------------------------
------------------------------------------------------------
------------------------------------------------------------
------------------------------------------------------------
------------------------------------------------------------
------------------------------------------------------------
------------------------------------------------------------
------------------------------------------------------------
------------------------------------------------------------
------------------------------------------------------------
------------------------------------------------------------
------------------------------------------------------------
------------------------------------------------------------
------------------------------------------------------------
------------------------------------------------------------
------------------------------------------------------------
------------------------------------------------------------
------------------------------------------------------------
------------------------------------------------------------
------------------------------------------------------------
------------------------------------------------------------
------------------------------------------------------------
------------------------------------------------------------
------------------------------------------------------------
------------------------------------------------------------
------------------------------------------------------------
------------------------------------------------------------
------------------------------------------------------------
------------------------------------------------------------
------------------------------------------------------------
------------------------------------------------------------
------------------------------------------------------------
------------------------------------------------------------
------------------------------------------------------------
------------------------------------------------------------
------------------------------------------------------------
-----------
>EF392400
------------------------------------------------------------
--------------ggattcccc--tag-taatggcgaatgaacagggaa--aagcccga
ctttaaaatcac-c------------taa----ccgtgaa-ttgtagttcataag--agg
gtagaactgt-g-ctgccttgccttaa-gtctcttgaaaaa-gagctacaaagagggtga
catgcccg-------ttttggagcaagtagtggtataggac-ttaactctaaagagtcat
gttgcttgagaatgcagcataaaatgggtggtaaattccatctaaggctaaatactggta
agaga-ccgatagtaaacaagtaccttaagggaaagatgaaagagaaccttgaaaagggg
ctcaaa-agaaagtgaaattgttataaggaaaccgcttaaaact----------------
tctggagtct--------------------------------------atgcaccca---
-------ttagagggggagccatcctct-t-----tgtatgggtgtatgggt--------
--agctattgctcaggtctgagcttatgagggctag-aggggaaggtagattgagccttg
gc-----------------------------------ttgatttctt-------------
-----------------------------------------------------acag---
----------------------------------------------accctttagccc-t
ttaaagtttgggccagtgtagaaagtcatga---ggcag---------ctagctctttgt
ttgaatggtgcaatagacttgtgctagag-----------tgctgttttgatgttggcct
a-------------------------------gtactgctga-atgctttaatagctaag
gag--ag--------------------------ttaagcgacccgtcttgaaacacggac
caaggagtctaacatat-atgcaagtattatggc----atgaagcccagactgcgcaatg
aaagtgatttc-----aaggtagga--tcctg------------caaag-----gtgcac
tatcgaccgagctataggg--a-ttcttttctatggtttgagtaagagcacatatgttgg
tacccg-aaagatggtgaa-ctatgcctgaatagggtgaagccaggggaaa-ccct----
----------------ggtggaagctcgta-gcga-------------------------
------------------------------------------------------------
-ttctga-cgtgcaaatcgatcgt-caaatttgggtata-ggggcgaaagacta------
------------------------------------------------------------
------------------------------------------------------------
------------------------------------------------------------
------------------------------------------------------------
------------------------------------------------------------
------------------------------------------------------------
------------------------------------------------------------
------------------------------------------------------------
------------------------------------------------------------
------------------------------------------------------------
------------------------------------------------------------
------------------------------------------------------------
------------------------------------------------------------
------------------------------------------------------------
------------------------------------------------------------
------------------------------------------------------------
------------------------------------------------------------
------------------------------------------------------------
------------------------------------------------------------
------------------------------------------------------------
------------------------------------------------------------
------------------------------------------------------------
------------------------------------------------------------
------------------------------------------------------------
------------------------------------------------------------
------------------------------------------------------------
------------------------------------------------------------
------------------------------------------------------------
------------------------------------------------------------
------------------------------------------------------------
------------------------------------------------------------
------------------------------------------------------------
------------------------------------------------------------
------------------------------------------------------------
------------------------------------------------------------
------------------------------------------------------------
-----------
>JX242604
------------------------------------------------------------
------------------ttccc--tag-taatggcgaatgaacagggaa--aagcccga
ctttaaaatcac-c------------taa----ccgtgaa-ttgtagtttataag--agg
gtagaactgt-g-ctgccttgccttaa-gtctcttgaaaaa-gagctacaaagagggtga
catgcccg-------ttttggagcaagtagtggtataggac-ttaactctaaagagtcat
gttgcttgagaatgcagcataaaatgggtggtaaattccatctaaggctaaatactggta
agaga-ccgatagtaaacaagtaccttaagggaaagatgaaagagaaccttgaaaagggg
ctcaaa-agaaagtgaaattgttataaggaaaccgcttaaaact----------------
tctggagtct--------------------------------------atgcaccca---
-------ttagagggggagccatcctct-t-----tgtatgggtgtatgggt--------
--agctattgctcaggtctgagcttatgagggctag-aggggaaggtagattgagccttg
gc-----------------------------------ttgatttctt-------------
-----------------------------------------------------acag---
----------------------------------------------accctttagccc-t
ttaaagtttgggccagtgtagaaagtcatga---ggcag---------ctagctctttgt
ttgaatggtgcaatagacttgtgctagag-----------tgctgttttgatgttggcct
a-------------------------------gtactgctga-atgctttaatagctaag
gag--ag--------------------------ttaagcgacccgtcttgaaacacggac
caaggagtctaacatat-atgcaagtattatggc----atgaagcccagactgcgcaatg
aaagtgatttc-----aaggtagga--tcctg------------caaag-----gtgcac
tatcgaccgagctataggg--a-ttcttttctatggtttgagtaagagcacatatgttgg
tacccg-aaagatggtgaa-ctatgcctgaatagggtgaagccaggggaaa-ccct----
----------------ggtggaagctcgta-gcga-------------------------
------------------------------------------------------------
-ttctga-cgtgcaaatcgatcgt-caaatttgggtata-ggggcgaaagactaatcgaa
ccatctagtagctggttcctg---------------------------------------
------------------------------------------------------------
------------------------------------------------------------
------------------------------------------------------------
------------------------------------------------------------
------------------------------------------------------------
------------------------------------------------------------
------------------------------------------------------------
------------------------------------------------------------
------------------------------------------------------------
------------------------------------------------------------
------------------------------------------------------------
------------------------------------------------------------
------------------------------------------------------------
------------------------------------------------------------
------------------------------------------------------------
------------------------------------------------------------
------------------------------------------------------------
------------------------------------------------------------
------------------------------------------------------------
------------------------------------------------------------
------------------------------------------------------------
------------------------------------------------------------
------------------------------------------------------------
------------------------------------------------------------
------------------------------------------------------------
------------------------------------------------------------
------------------------------------------------------------
------------------------------------------------------------
------------------------------------------------------------
------------------------------------------------------------
------------------------------------------------------------
------------------------------------------------------------
------------------------------------------------------------
------------------------------------------------------------
------------------------------------------------------------
-----------
>EF392399
------------------------------------------------------------
-----------cagggattcccc--tag-taatggcgaatgaccagggaa--aagcccaa
ctttaaaatcac-t------------taa----ccgtgaa-ttgtagtttataaa-aagg
gtagaattat-a-ttatcttatcttaa-gtttcttgaaaaa-gtactacaaagagggtga
aattcccg-------ttttggcataagtaataatataaaac-ttaactttttagagtcat
gttgcttgtgaatgcagcataaaatgggaggtaaattccttctaaggctaaatactggta
ggagt-ccgatagtaaacaagtaccttaagggaaagatgaaagagaaccttgaaaagggt
ctcaaa-agaaagtgaaattgttataaggaaaccacttaaaact----------------
tctggagttt--------------------------------------atatattaa---
-------tgtataagggagcaatccttt-t-----gtccttagtatatagat--------
--ggctattgctaaagtttgagcttataaaaattatgagggggaggtaagttaaatctag
gt-----------------------------------ttaacttctt-------------
-----------------------------------------------------ataa---
----------------------------------------------cccttttaattt-t
ttaaagtttaagctggtgtacaaagtcataa---ggtag---------ctagctcttaat
ataaatattataatagatttat-ctaaag-----------ttttatttatagtaaggtct
a-------------------------------tcactatcgctatgctttaatagttaag
gag--ac--------------------------ttaagtgacccgtcttgaaacacggac
caaggagtctaacatat-atgcaagtattatggt----gtaaaaactaaaatgcgtaatg
aaagtaatttc-----tgggtagga--actcg------------aaaga-----gcgcac
tatcgaccgagctataggg--a-tttttttctatggtttgagtaagagcatatatgttgg
tacccg-aaagatggtgaa-ctatacctgaatagggtgaagccaggggaaa-ccct----
----------------ggtggaagctcgta-gcga-------------------------
------------------------------------------------------------
-ttctga-cgtgcaaatcgatcgt-cgaatttgggtatagggggcgaaagacta------
------------------------------------------------------------
------------------------------------------------------------
------------------------------------------------------------
------------------------------------------------------------
------------------------------------------------------------
------------------------------------------------------------
------------------------------------------------------------
------------------------------------------------------------
------------------------------------------------------------
------------------------------------------------------------
------------------------------------------------------------
------------------------------------------------------------
------------------------------------------------------------
------------------------------------------------------------
------------------------------------------------------------
------------------------------------------------------------
------------------------------------------------------------
------------------------------------------------------------
------------------------------------------------------------
------------------------------------------------------------
------------------------------------------------------------
------------------------------------------------------------
------------------------------------------------------------
------------------------------------------------------------
------------------------------------------------------------
------------------------------------------------------------
------------------------------------------------------------
------------------------------------------------------------
------------------------------------------------------------
------------------------------------------------------------
------------------------------------------------------------
------------------------------------------------------------
------------------------------------------------------------
------------------------------------------------------------
------------------------------------------------------------
------------------------------------------------------------
-----------
>EF392380
------------------------------------------------------------
--------------------------------------------cgggaa--aagcccaa
ctttaaaatcac-t------------taa----ccgtgaa-ttgtagtttataaa--agg
gtagaactat-a-ttatcttatcttaa-gttatttgaaaaa-atactacagagagggtga
aattcccg-------ttttggcataagtaataatatagaac-ttaacttttaagagtcat
gttgcttgtgaatgcagcataaagtgggaggtaaattccttctaaggctaaatactggta
ggagt-ccgatagtaaacaagtaccttaagggaaagatgaaagagaaccttgaaaagggt
ctcaaa-agaaagtgaaattgttataaggaaaccacttaaaact----------------
tctggagtct--------------------------------------atatattaa---
-------tatatggggaagcaattccct-t-----gttcttaatatatgggt--------
--ggctattgctaaagtttgagcttataaaaattatggaggggaggtaagttaaatttcg
gt-----------------------------------ttaacttctt-------------
-----------------------------------------------------ataa---
----------------------------------------------cctttttaattt-t
ttaaagtttgggctggtgtataaagtcatat---gatag---------ctagctctgaat
ataaatattataatagatttat-ctagag-----------ttttatttatgtttaggtct
a-------------------------------tcactattgg-atgctttaatagttaag
aag--gc--------------------------ttaagtgacccgtcttgaaacacggac
caaggagtctaacatat-atgcaagtattatggt----gtaaaaactaaaatgcgtaatg
aaagtaatttc-----tgggtagga--tctcg------------caaga-----gtgcac
tatcgaccgagctataggg--a-tttttttctatggtttgcgtaagagcatatatgttgg
tacccg-aaagatggtgaa-ctatacctgaatagggtgaagccaggggaaa-ccct----
----------------ggtggaagctcgta-gcga-------------------------
------------------------------------------------------------
-ttctga-cgtgcaaatcgatcgt-cgaatttgggtata-ggggcgaaagactaat----
------------------------------------------------------------
------------------------------------------------------------
------------------------------------------------------------
------------------------------------------------------------
------------------------------------------------------------
------------------------------------------------------------
------------------------------------------------------------
------------------------------------------------------------
------------------------------------------------------------
------------------------------------------------------------
------------------------------------------------------------
------------------------------------------------------------
------------------------------------------------------------
------------------------------------------------------------
------------------------------------------------------------
------------------------------------------------------------
------------------------------------------------------------
------------------------------------------------------------
------------------------------------------------------------
------------------------------------------------------------
------------------------------------------------------------
------------------------------------------------------------
------------------------------------------------------------
------------------------------------------------------------
------------------------------------------------------------
------------------------------------------------------------
------------------------------------------------------------
------------------------------------------------------------
------------------------------------------------------------
------------------------------------------------------------
------------------------------------------------------------
------------------------------------------------------------
------------------------------------------------------------
------------------------------------------------------------
------------------------------------------------------------
------------------------------------------------------------
-----------
>EF392390
------------------------------------------------------------
--------------ggattcccc--tag-taatggcgaatgaacagggaa--aagcccaa
ctttaaaatcac-t------------taa----ccgtgaa-ttgtagtttataaa--agg
gtagaattgt-a-ttatcttaacttaa-gttacttgaaaaa-gtgctacaaagagggtga
aatacccg-------ttttggtttaagtaataatatgaaac-ttaactttttagagtcat
gttgcttgtgaatgcagcataaagtgggaggtaaattccttctaaggctaaatactggta
gaagt-ccgatagtaaacaagtaccttaagggaaagatgaaagagaaccttgaaaagggt
ctcaaa-agaaagtgaaatcattatagggaaaccacttaaaact----------------
tctggaatct--------------------------------------gtatattaa---
-------attatgaaaaagcaatttttcat-----attcttagtatatgggt--------
--ggctattgctaaagtttgagcttataaaaattatgggggggaggtatattgaatctag
gt-----------------------------------ttaatatctt-------------
-----------------------------------------------------ataa---
----------------------------------------------ccctcttaattt-t
ttaaagtttgggctggtgtacaaagtcataa---gatag---------ctagctctgaat
ataaatattataataaatttat-ttagaa-----------ttttatttatattttggtct
a-------------------------------tcactattga-atgctttaatagttaag
gag--ac--------------------------ttaagtgacccgtcttgaaacacggac
caaggagtctaacatat-atgcaagtattatggt----gtaaaaactaaaatgcgtaatg
aaagtaatttc-----agggtagga--actcg------------caaga-----gtgcac
tatcgactgagctataagg--a-ttttttcttatggtttaagtaagagcatatatgttgg
tacccg-aaagatggtgaa-ctatacctgaatagggtgaagccaggggaaanccct----
----------------ggtggaagctcgta-gcga-------------------------
------------------------------------------------------------
-ttctga-cgtgcaaatcgatcgt-cgaatttgggtata-ggggcgaaagacta------
------------------------------------------------------------
------------------------------------------------------------
------------------------------------------------------------
------------------------------------------------------------
------------------------------------------------------------
------------------------------------------------------------
------------------------------------------------------------
------------------------------------------------------------
------------------------------------------------------------
------------------------------------------------------------
------------------------------------------------------------
------------------------------------------------------------
------------------------------------------------------------
------------------------------------------------------------
------------------------------------------------------------
------------------------------------------------------------
------------------------------------------------------------
------------------------------------------------------------
------------------------------------------------------------
------------------------------------------------------------
------------------------------------------------------------
------------------------------------------------------------
------------------------------------------------------------
------------------------------------------------------------
------------------------------------------------------------
------------------------------------------------------------
------------------------------------------------------------
------------------------------------------------------------
------------------------------------------------------------
------------------------------------------------------------
------------------------------------------------------------
------------------------------------------------------------
------------------------------------------------------------
------------------------------------------------------------
------------------------------------------------------------
------------------------------------------------------------
-----------
>EF392384
------------------------------------------------------------
--------------ggattcccc--tag-taatggcgaatgaacagggaa--aagcccaa
ctttaaaatcac-t------------taa----ccgtgaa-ttgtagtttataaa--agg
gtagaattgt-a-ttatcttagcttaa-gttacttgaaaaa-gtgctacaaagagggtga
aatgcccg-------ttttggtttaagtaataatatgaaac-ttaactttttagagtcat
gttgcttgtgaatgcagcataaagtgggaggtaaattccttctaaggctaaatactggta
gaagt-ccgatagtaaacaagtaccttaagggaaagatgaaagagaaccttgaaaagggt
ctcaaa-agaaagtgaaattgttatagggaaaccacttaaaact----------------
tctggaatct--------------------------------------gtatattaa---
-------attataaaaaagcaattttttgt-----atttttagtatatgggt--------
--ggctattgctaaagtttgagcttataaaaattatggggggcaggtatattgaatcttg
gt-----------------------------------ttaatatctt-------------
-----------------------------------------------------ataa---
----------------------------------------------ccttcttaattt-t
ttaaagtttgggctggtgtacaaagtcataa---gatag---------ctagctctgaat
ataaatattataataaatttat-ttagaa-----------ttttatttatattttggtct
a-------------------------------tcactattga-atgctttaatagttaag
gag--ac--------------------------ttaagtgacccgtcttgaaacacggac
caaggagtctaacatat-atgcaagtattatggt----gtaaaaactaaaatgcgtaatg
aaagtaatttc-----agggtagga--actcg------------aaaga-----gtgcac
tatcgactgagctataagg--a-ttttttcttgtggtttaagtaagagcatatatgttgg
tacccg-aaagatggtgaa-ctatacctgaatagggtgaagccaggggaaa-ccct----
----------------ggtggaagctcgta-gcga-------------------------
------------------------------------------------------------
-ttctga-cgtgcaaatcgatcgt-cgaatttgggtata-ggggcgaaagactaa-----
------------------------------------------------------------
------------------------------------------------------------
------------------------------------------------------------
------------------------------------------------------------
------------------------------------------------------------
------------------------------------------------------------
------------------------------------------------------------
------------------------------------------------------------
------------------------------------------------------------
------------------------------------------------------------
------------------------------------------------------------
------------------------------------------------------------
------------------------------------------------------------
------------------------------------------------------------
------------------------------------------------------------
------------------------------------------------------------
------------------------------------------------------------
------------------------------------------------------------
------------------------------------------------------------
------------------------------------------------------------
------------------------------------------------------------
------------------------------------------------------------
------------------------------------------------------------
------------------------------------------------------------
------------------------------------------------------------
------------------------------------------------------------
------------------------------------------------------------
------------------------------------------------------------
------------------------------------------------------------
------------------------------------------------------------
------------------------------------------------------------
------------------------------------------------------------
------------------------------------------------------------
------------------------------------------------------------
------------------------------------------------------------
------------------------------------------------------------
-----------
>EF392386
------------------------------------------------------------
----------------attccccgtaga-taatggcgaatgaacagggaa--aagcccaa
ctttaaaatcac-t------------taa----ccgtgaa-ttgtagtttataaa--agg
gtagaattgt-a-ttatcttagcttaa-gttacttgaaaaa-gtgctacaaagagggtga
aatacccg-------ttttggtttaagtaataatatgaaac-ttaactttttagagtcat
gttgcttgtgaatgcagcataaagtgggaggtaaattccttctaaggctaaatactggta
gaagt-ccgatagtaaacaagtaccttaagngaaagatgaaagagaaccttgaaaagggt
ctcaaa-agaaagtgaaattgttgtagggaaaccacttaaaact----------------
tctggaatct--------------------------------------gtatattaa---
-------attataaaaaagcaattttttgt-----atttttagtatatgggt--------
--ggctattgctaaagtttgagcttataaaaattatgggggggaggtatattgaatcttg
gt-----------------------------------ttaatatctt-------------
-----------------------------------------------------ataa---
----------------------------------------------ccttcttaattt-t
ttaaagtttgggctggtgtacaaagtcataa---gatag---------ctagctctgaat
ataaatattataataaatttat-ttagaa-----------ttttatttatattttggtct
a-------------------------------tcactattga-atgctttaatagttaag
gag--ac--------------------------ttaagtgacccgtcttgaaacacggac
caaggagtctaacatat-atgcaagtattatggt----gtaaaaactaaaatgcgtaatg
aaagtaatttc-----agggtagga--actcg------------aaaga-----gtgcac
tatcgactgagctataagg--a-ttttttcttgtggtttaagtaagagcatatatgttgg
tacccg-aaagatggtgaa-ctatacctgaatagggtgaagccaggggaaa-ccct----
----------------ggtggaagctcgta-gcga-------------------------
------------------------------------------------------------
-ttctga-cgtgcaaatcgatcgt-cgaatttgggtata-ggggcgaaag----------
------------------------------------------------------------
------------------------------------------------------------
------------------------------------------------------------
------------------------------------------------------------
------------------------------------------------------------
------------------------------------------------------------
------------------------------------------------------------
------------------------------------------------------------
------------------------------------------------------------
------------------------------------------------------------
------------------------------------------------------------
------------------------------------------------------------
------------------------------------------------------------
------------------------------------------------------------
------------------------------------------------------------
------------------------------------------------------------
------------------------------------------------------------
------------------------------------------------------------
------------------------------------------------------------
------------------------------------------------------------
------------------------------------------------------------
------------------------------------------------------------
------------------------------------------------------------
------------------------------------------------------------
------------------------------------------------------------
------------------------------------------------------------
------------------------------------------------------------
------------------------------------------------------------
------------------------------------------------------------
------------------------------------------------------------
------------------------------------------------------------
------------------------------------------------------------
------------------------------------------------------------
------------------------------------------------------------
------------------------------------------------------------
------------------------------------------------------------
-----------
>JN131538
-------------------------------------------------------acggg
gagcagaactaacaggattccct--tag-taatggcgaatgaacagggat--aagctcaa
ctttaaaatcca-gc------------------aatggag-ttgtagtctagaaa--gga
ccaatcaagagg-cagcttattaggaagtcagtctggaaag-actctacaaagagggtga
tatacccg--taccaaataagctaggcttg------agaat-tggaccttgaagagtcag
gttgcttgggactgcagcctaaaatgggaggtaaatttcttctaaagctaaatacaggca
agaga-ccgatagcgaacaagtaccgtgagggaaagatgaaatagaaccttgaaaagggg
tttaaa-aggaagtgaaattgttaaaagggaaacacttgaaggtcgagataggtgaattg
gaaatggctt--------------------------------------attcttaag---
-------ctgtgctccaat--------------------------caccagc--------
--ggttaacgaatgttttggata-atggagaagggtattatgaaggtaggttggggtc--
-----------------aaacctaacaacttatagcataatatgctt-------------
-----------------------------------acattatcarggacatttagaa---
------------------------------------------------tcaactactt-g
gtagaatcaaattattttggtagaatggcagttttcgga---------ctctcattctat
tcaaaatgatcacattctatca--------------------------------------
----------------------------------------------------------ag
gaa--tgattcg---agtttgaccaagagatcttcaagtgacccgtcttgaaacacggac
caaggagtctaacatgt-ttgcgagtatttggaa----cgtaaatcca-tatgcgaaatg
aaagtgagttc-----aaggtaggatcc----------------attag-----gagcac
tatcaaccgatccattggg--t-ttcgatccaaggaattgagtcagagcgaatatgttgg
ggcccg-aaagatggtgaa-ctatgcctgaatagggagaagccagaggaaa-ctct----
----------------ggtggaagctcgta-gcga-------------------------
------------------------------------------------------------
-ttctga-cgtgcaaatcgatcgt-ctaatttgggtata-ggg-cgaaagactaatcgaa
ccatccagtggcc-----------------------------------------------
------------------------------------------------------------
------------------------------------------------------------
------------------------------------------------------------
------------------------------------------------------------
------------------------------------------------------------
------------------------------------------------------------
------------------------------------------------------------
------------------------------------------------------------
------------------------------------------------------------
------------------------------------------------------------
------------------------------------------------------------
------------------------------------------------------------
------------------------------------------------------------
------------------------------------------------------------
------------------------------------------------------------
------------------------------------------------------------
------------------------------------------------------------
------------------------------------------------------------
------------------------------------------------------------
------------------------------------------------------------
------------------------------------------------------------
------------------------------------------------------------
------------------------------------------------------------
------------------------------------------------------------
------------------------------------------------------------
------------------------------------------------------------
------------------------------------------------------------
------------------------------------------------------------
------------------------------------------------------------
------------------------------------------------------------
------------------------------------------------------------
------------------------------------------------------------
------------------------------------------------------------
------------------------------------------------------------
------------------------------------------------------------
-----------
>EF392371
------------------------------------------------------------
--gaagactaacagggattccct--cagttaatggcgaatgaacagggaa--aagctcaa
atttaaaatccg---------------------aaaggaa-ttgtagtttaaaaa----a
atatcgtcagtg-acagatctggattaagtagcctggaaag-gctctacagagagggtaa
catacccg--tattaagccaagaaagctgatcacattgtac-tttattttaaagagtcag
gttgcttgggactgcagcctaaaatgggaggtaaatttcttctaaagctaaatattggca
agaga-ccgatagcgaacaagtaccgtgagggaaagatgaaatagaaccttgaaaagggg
tttaaa-aggaagtgaaattgttaaaagggaaacgcttaaacatcgagacagataagttg
a--------------------------------------------------tttaagatt
ttaaatcctataatcaatt--------------------------tattggc--------
--ggctaacgggtgtttttatta-atggagaagggtttaatgaaggtatgttggggtt--
-----------------aaacttaacgacttatagcattaaatttct-------------
-----------------------------------acattaattgagacatttttaa---
----------------------------------------------tttttataactc-t
gaaatattcaggtgaagcaataaattggcagttttagga---------ctctctttttat
ttgatttcatcaaaatgtttta--------------------------------------
----------------------------------------------------------aa
gg----tatttgaatagtttggccttgagatatttaagcgacccgtcttgaaacacggac
caaggagtctaacatgt-ttgcgagtattatggt----ggtaaaccaagtatgcgtaatg
aaagtgagttc-----aaggtaggaccct---------------tttag-----gggcac
tatcaaccgatctattagg--t-ttttatctatagaattgagttagagctaatatgttgg
gacccg-aaagatggtgaa-ctatgcctgaatagggcgaagccagaggaaa-ctct----
----------------ggtggaggctcgta-gcga-------------------------
------------------------------------------------------------
-ttctga-cgtgcaaatcgatcgt-caaatttgggtatagggggcgaaagactaatcgac
------------------------------------------------------------
------------------------------------------------------------
------------------------------------------------------------
------------------------------------------------------------
------------------------------------------------------------
------------------------------------------------------------
------------------------------------------------------------
------------------------------------------------------------
------------------------------------------------------------
------------------------------------------------------------
------------------------------------------------------------
------------------------------------------------------------
------------------------------------------------------------
------------------------------------------------------------
------------------------------------------------------------
------------------------------------------------------------
------------------------------------------------------------
------------------------------------------------------------
------------------------------------------------------------
------------------------------------------------------------
------------------------------------------------------------
------------------------------------------------------------
------------------------------------------------------------
------------------------------------------------------------
------------------------------------------------------------
------------------------------------------------------------
------------------------------------------------------------
------------------------------------------------------------
------------------------------------------------------------
------------------------------------------------------------
------------------------------------------------------------
------------------------------------------------------------
------------------------------------------------------------
------------------------------------------------------------
------------------------------------------------------------
------------------------------------------------------------
-----------
>DQ364207
------------------------------------------------------------
--------------------------------tggcgaatgaacagggaa--aagctcaa
atttaaaatccg---------------------aaaggaa-ttgtagtttaaaaa----a
atatcgtcagtg-acagatctggattaagtagcctggaaag-gctctacagagagggtaa
catacccg--tattaagccaagaaagctgatcacattgtac-tttattttaaagagtcag
gttgcttgggactgcagcctaaaatgggaggtaaatttcttctaaagctaaatattggca
agaga-ccgatagcgaacaagtaccgtgagggaaagatgaaatagaaccttgaaaagggg
tttaaa-aggaagtgaaattgttaaaagggaaacgcttaaacatcgagacagataagttg
a--------------------------------------------------tttaagatt
ttaaatcctataatcaatt--------------------------tattggc--------
--ggctaacgggtgtttttatta-atggagaagggtttaatgaaggtatgttggggtt--
-----------------aaacttaacgacttatagcattaaatttct-------------
-----------------------------------acattaattgagacatttttaa---
----------------------------------------------tttttataactc-t
gaaatattcaggtgaagcaataaattggcagttttagga---------ctctctttttat
ttgatttcatcaaaatgtttta--------------------------------------
----------------------------------------------------------aa
gg----tatttgaatagtttggccttgagatatttaagcgacccgtcttgaaacacggac
caaggagtctaacatgt-ttgcgagtattatggt----ggtaaaccaagtatgcgtaatg
aaagtgagttc-----aaggtaggaccct---------------tttag-----gggcac
tatcaaccgatctattagg--t-ttttatctatagaattgagttagagctaatatgttgg
gacccg-aaagatggtgaa-ctatgcctgaatagggcgaagccagaggaaa-ctct----
----------------ggtggaggctcgta-gcga-------------------------
------------------------------------------------------------
-ttctga-cgtgcaaatcgatcgt-caaatttgggtata-ggg-----------------
------------------------------------------------------------
------------------------------------------------------------
------------------------------------------------------------
------------------------------------------------------------
------------------------------------------------------------
------------------------------------------------------------
------------------------------------------------------------
------------------------------------------------------------
------------------------------------------------------------
------------------------------------------------------------
------------------------------------------------------------
------------------------------------------------------------
------------------------------------------------------------
------------------------------------------------------------
------------------------------------------------------------
------------------------------------------------------------
------------------------------------------------------------
------------------------------------------------------------
------------------------------------------------------------
------------------------------------------------------------
------------------------------------------------------------
------------------------------------------------------------
------------------------------------------------------------
------------------------------------------------------------
------------------------------------------------------------
------------------------------------------------------------
------------------------------------------------------------
------------------------------------------------------------
------------------------------------------------------------
------------------------------------------------------------
------------------------------------------------------------
------------------------------------------------------------
------------------------------------------------------------
------------------------------------------------------------
------------------------------------------------------------
------------------------------------------------------------
-----------
>DQ364199
------------------------------------------------------------
-----------------ttccct--cagttaatggcgaatgaacagggaa--aagctcaa
atttaaaatccg---------------------aaaggaa-ttgtagtttaaaaa----a
atatcgtcagtg-acagatctggattaagtagcctggaaag-gctctacagagagggtaa
catacccg--tattaagccaagaaagctgatcacattgtac-tttattttaaagagtcag
gttgcttgggactgcagcctaaaatgggaggtaaatttcttctaaagctaaatattggca
agaga-ccgatagcgaacaagtaccgtgagggaaagatgaaatagaaccttgaaaagggg
tttaaa-aggaagtgaaattgttaaaagggaaacgcttaaacatcgagacagataagttg
a--------------------------------------------------tttaagatt
ttaaatcctataatcaatt--------------------------tattggc--------
--ggctaacgggtgtttttatta-atggagaagggtttaatgaaggtatgttggggtt--
-----------------aaacttaacgacttatagcattaaatttct-------------
-----------------------------------acattaattgagacatttttaa---
----------------------------------------------tttttataactc-t
gaaatattcaggtgaagcaataaattggcagttttagga---------ctctctttttat
ttgatttcatcaaaatgtttta--------------------------------------
----------------------------------------------------------aa
gg----tatttgaatagtttggccttgagatatttaagcgacccgtcttgaaacacggac
caaggagtctaacatgt-ttgcgagtattatggt----ggtaaaccaagtatgcgtaatg
aaagtgagttc-----aaggtaggaccct---------------tttag-----gggcac
tatcaaccgatctattagg--t-ttttatctatagaattgagttagagctaatatgttgg
gacccg-aaagatggtgaa-ctatgcctgaatagggcgaagccagaggaaa-ctct----
----------------ggtggaggctcgta-gcga-------------------------
------------------------------------------------------------
-ttctga-cgtgcaaatcgatcgt-caaatttgggtata-gggggc--------------
------------------------------------------------------------
------------------------------------------------------------
------------------------------------------------------------
------------------------------------------------------------
------------------------------------------------------------
------------------------------------------------------------
------------------------------------------------------------
------------------------------------------------------------
------------------------------------------------------------
------------------------------------------------------------
------------------------------------------------------------
------------------------------------------------------------
------------------------------------------------------------
------------------------------------------------------------
------------------------------------------------------------
------------------------------------------------------------
------------------------------------------------------------
------------------------------------------------------------
------------------------------------------------------------
------------------------------------------------------------
------------------------------------------------------------
------------------------------------------------------------
------------------------------------------------------------
------------------------------------------------------------
------------------------------------------------------------
------------------------------------------------------------
------------------------------------------------------------
------------------------------------------------------------
------------------------------------------------------------
------------------------------------------------------------
------------------------------------------------------------
------------------------------------------------------------
------------------------------------------------------------
------------------------------------------------------------
------------------------------------------------------------
------------------------------------------------------------
-----------
>JN131539
------------------------------------------------------------
---agaactaacaaggattccct--cag-taatggcgaatgaacagggaa--aagctcaa
atttaaaatccg---------------------aaaggaa-ttgtagtttaaaaa----a
atatcgtcagtg-acagatctggattaagtagcctggaaag-gctctacagagagggtaa
catacccg--tattaagccaagaaagctgatcacattgtac-tttattttaaagagtcag
gttgcttgggactgcagcctaaaatgggaggtaaatttcttctaaagctaaatattggca
agaga-ccgatagcgaacaagtaccgtgagggaaagatgaaatagaaccttgaaaagggg
tttaaa-aggaagtgaaattgttaaaagggaaacgcttaaacatcgagacagataagttg
a--------------------------------------------------tttaagatt
ttaaatcctataatcaatt--------------------------tattggc--------
--ggctaacgggtgtttttatta-atggagaagggtttaatgaaggtatgttggggtt--
-----------------aaacttaacgacttatagcattaaatttct-------------
-----------------------------------acattaattgagacatttttaa---
----------------------------------------------tttttataactc-t
gaaatattcaggtgaagcaataaattggcagttttagga---------ctctctttttat
ttgatttcatcaaaatgtttta--------------------------------------
----------------------------------------------------------aa
gg----tatttgaatagtttggccttgagatatttaagcgacccgtcttgaaacacggac
caaggagtctaacatgt-ttgcgagtattatggt----ggtaaaccaagtatgcgtaatg
aaagtgagttc-----aaggtaggaccct---------------tttag-----gggcac
tatcaaccgatctattagg--t-ttttatctatagaattgagttagagctaatatgttgg
gacccg-aaagatggtgaa-ctatgcctgaatagggcgaagccagaggaaa-ctct----
----------------ggtggaggctcgta-gcga-------------------------
------------------------------------------------------------
-ttctga-cgtgcaaatcgatcgt-caaatttgggtata-ggggcgaaagactaatcgaa
ccat--------------------------------------------------------
------------------------------------------------------------
------------------------------------------------------------
------------------------------------------------------------
------------------------------------------------------------
------------------------------------------------------------
------------------------------------------------------------
------------------------------------------------------------
------------------------------------------------------------
------------------------------------------------------------
------------------------------------------------------------
------------------------------------------------------------
------------------------------------------------------------
------------------------------------------------------------
------------------------------------------------------------
------------------------------------------------------------
------------------------------------------------------------
------------------------------------------------------------
------------------------------------------------------------
------------------------------------------------------------
------------------------------------------------------------
------------------------------------------------------------
------------------------------------------------------------
------------------------------------------------------------
------------------------------------------------------------
------------------------------------------------------------
------------------------------------------------------------
------------------------------------------------------------
------------------------------------------------------------
------------------------------------------------------------
------------------------------------------------------------
------------------------------------------------------------
------------------------------------------------------------
------------------------------------------------------------
------------------------------------------------------------
------------------------------------------------------------
-----------
>DQ364200
------------------------------------------------------------
--------------------cct--cag-taatggcgaatgaacagggaa--aagctcaa
atttaaaatccg---------------------aaaggaa-ttgtagtttaaaaa----a
atatcgtcagtg-acagatctggattaagtagcctggaaag-gctctacagagagggtaa
catacccg--tattaagccaagaaagctgatcacattgtac-tttattttaaagagtcag
gttgcttgggactgcagcctaaaatgggaggtaaatttcttctaaagctaaatattggca
agaga-ccgatagcgaacaagtaccgtgagggaaagatgaaatagaaccttgaaaagggg
tttaaa-aggaagtgaaattgttaaaagggaaacgcttaaacatcgagacagataagttg
a--------------------------------------------------tttaagatt
ttaaatcctataatcaatt--------------------------tattggc--------
--ggctaacgggtgtttttatta-atggagaagggtttaatgaaggtatgttggggtt--
-----------------aaacttaacgacttatagcattaaatttct-------------
-----------------------------------acattaattgagacatttttaa---
----------------------------------------------tttttataactc-t
gaaatattcaggtgaagcaataaattggcagttttagga---------ctctctttttat
ttgatttcatcaaaatgtttta--------------------------------------
----------------------------------------------------------aa
gg----tatttgaatagtttggccttgagatatttaagcgacccgtcttgaaacacggac
caaggagtctaacatgt-ttgcgagtattatggt----ggtaaaccaagtatgcgtaatg
aaagtgagttc-----aaggtaggaccct---------------tttag-----gggcac
tatcaaccgatctattagg--t-ttttatctatagaattgagttagagctaatatgttgg
gacccg-aaagatggtgaa-ctatgcctgaatagggcgaagccagaggaaa-ctct----
----------------ggtggaggctcgta-gcga-------------------------
------------------------------------------------------------
-ttctga-cgtgcaaatcgatcgt-caaatttgggtat----------------------
------------------------------------------------------------
------------------------------------------------------------
------------------------------------------------------------
------------------------------------------------------------
------------------------------------------------------------
------------------------------------------------------------
------------------------------------------------------------
------------------------------------------------------------
------------------------------------------------------------
------------------------------------------------------------
------------------------------------------------------------
------------------------------------------------------------
------------------------------------------------------------
------------------------------------------------------------
------------------------------------------------------------
------------------------------------------------------------
------------------------------------------------------------
------------------------------------------------------------
------------------------------------------------------------
------------------------------------------------------------
------------------------------------------------------------
------------------------------------------------------------
------------------------------------------------------------
------------------------------------------------------------
------------------------------------------------------------
------------------------------------------------------------
------------------------------------------------------------
------------------------------------------------------------
------------------------------------------------------------
------------------------------------------------------------
------------------------------------------------------------
------------------------------------------------------------
------------------------------------------------------------
------------------------------------------------------------
------------------------------------------------------------
------------------------------------------------------------
-----------
>JX242593
-------------------------------------taagcatatcaataagcggagga
aaagaaactaaca-aggatccct--tag-taatggcgaatgaatagggaa--tagctcaa
atttaaaattgt-tt------------------ta-caag-ttgtaatttataga--agt
ttaattaag-cg-ttaaaactggttaaagttggctggaaag-ctactacagagagggtga
tatacccg--taactgattag---attttaatgttaataat-ttttcttcaaagagtcag
gttgcttgggactgcagcctaaaatgggaggtaaatttcttctaaagctaaatattggca
agaga-ccgatagcgaacaagtactgtgaaggaaagatgaaatagaaccttgaaaagggg
tttaaa-aggaagtgaaattgttaaaagggaaacgtttaaatggggtaaaaattaaattt
gatggaattt--------------------------------------atttttaag---
-------ttttaatcaaatt-------------------------taattat--------
--ggtcaatacggatttttgata-gtataaaagaatattataaacgtacattgatt----
-t---------------ttaattaatgacttatagtatagtatttta-------------
-------------------atactttt-------gaagatttga---------ataa---
----------------------------------------------atttttcaac----
-------------------ataaatttgtagttatttat---------aaaaagtttact
tttctatatttaattt--------------------------------------------
-------------------------------------------ataagttttaaattgaa
agacttt------gttattagatcttaacctttttaaacgacccgtcttgaaacacggac
caaggagtctaacatttaatgcgagtaaataggata--tataaaccta-tatgcgaaatg
aaagtgaattc-----aaggtaggatcatggatttattc--------at-----gagcac
tatcaaccgatctatttgg--a-ttttttcaatagaattgagtcagagcgtaaatgttgg
gacccg-aaagatggtgaa-ctatgcctgaatagggtgaagccagaggaaa-ctct----
----------------ggtggaggctcgta-gcga-------------------------
------------------------------------------------------------
-ttctga-cgtgcaaatcgatcgt-caaatttgggtata-ggggcgaaagactaatcgaa
ccatctagtagctggttcctgtcgaagtttccctcaggatagcagaaactcacacaatag
ttttatgaggtaaagcgaatgattagaggacttggggatgttaatattttcaacctattc
tcaaactttgaatctgtaagaagaattttgttacttaa-tgaacttaatcatacgaataa
------------------------------------------------------------
------------------------------------------------------------
------------------------------------------------------------
------------------------------------------------------------
------------------------------------------------------------
------------------------------------------------------------
------------------------------------------------------------
------------------------------------------------------------
------------------------------------------------------------
------------------------------------------------------------
------------------------------------------------------------
------------------------------------------------------------
------------------------------------------------------------
------------------------------------------------------------
------------------------------------------------------------
------------------------------------------------------------
------------------------------------------------------------
------------------------------------------------------------
------------------------------------------------------------
------------------------------------------------------------
------------------------------------------------------------
------------------------------------------------------------
------------------------------------------------------------
------------------------------------------------------------
------------------------------------------------------------
------------------------------------------------------------
------------------------------------------------------------
------------------------------------------------------------
------------------------------------------------------------
------------------------------------------------------------
------------------------------------------------------------
------------------------------------------------------------
------------------------------------------------------------
-----------
>EF392370
------------------------------------------------------------
-----agactaca-ggattccct--tag-taatggcgaatgaacagggaa--tagctcaa
atttaaaattgt-tt------------------ta-caag-ttgtaatttataga--agt
ttaattaag-cg-ttaaaactgattaaagttggctggaaag-ctactacagagagggtga
tatacccg--taactgattag---attttaatgttaataat-ttttcttcaaagagtcag
gttgcttgggactgcagcctaaaatgggaggtaaatttcttctaaagctaaatattggca
agaga-ccgatagcgaacaagtactgtgaaggaaagatgaaatagaaccttgaaaagggg
tttaaa-aggaagtgaaattgttaaaagggaaacgtttaaatggggtaaaaattaaattt
gatggaattt--------------------------------------atttttaag---
-------ttttaatcaaatt-------------------------taattat--------
--ggtcaatacggatttttgata-gtataaaagaatattataaacgtacattgatt----
-t---------------ttaattaatgacttatagtatagtatttta-------------
-------------------atactttt-------gaagatttga---------ataa---
----------------------------------------------atttttcaac----
-------------------ataaatttgtagttatttat---------aaaaagtttact
tttctatatttaattt--------------------------------------------
-------------------------------------------ataagttttaaattgaa
agacttt------gttattagatcttaacctttttaaacgacccgtcttgaaacacggac
caaggagtctaacatttaatgcgagtaaataggata--tataaaccta-tatgcgaaatg
aaagtgaattc-----aaggtaggatcatggatttattc--------at-----gagcac
tatcaaccgatctatttgg--a-ttttttcaatagaattgagtcagagcgtaaatgttgg
gacccg-aaagatggtgaa-ctatgcctgaatagggtgaagccagaggaaa-ctct----
----------------ggtggaggctcgta-gcga-------------------------
------------------------------------------------------------
-ttctga-cgtgcaaatcgatcgt-caaatttgggtata-ggggcgaaagactaatc---
------------------------------------------------------------
------------------------------------------------------------
------------------------------------------------------------
------------------------------------------------------------
------------------------------------------------------------
------------------------------------------------------------
------------------------------------------------------------
------------------------------------------------------------
------------------------------------------------------------
------------------------------------------------------------
------------------------------------------------------------
------------------------------------------------------------
------------------------------------------------------------
------------------------------------------------------------
------------------------------------------------------------
------------------------------------------------------------
------------------------------------------------------------
------------------------------------------------------------
------------------------------------------------------------
------------------------------------------------------------
------------------------------------------------------------
------------------------------------------------------------
------------------------------------------------------------
------------------------------------------------------------
------------------------------------------------------------
------------------------------------------------------------
------------------------------------------------------------
------------------------------------------------------------
------------------------------------------------------------
------------------------------------------------------------
------------------------------------------------------------
------------------------------------------------------------
------------------------------------------------------------
------------------------------------------------------------
------------------------------------------------------------
------------------------------------------------------------
-----------
>DQ364198
------------------------------------------------------------
------------------------------aatggcgaatgaacagggaa--tagctcaa
atttaaaattgt-tt------------------ta-caag-ttgtaatttataga--agt
ttaattaag-cg-ttaaaactgattaaagttggctggaaag-ctactacagagagggtga
tatacccg--taactgattag---attttaatgttaataat-ttttcttcaaagagtcag
gttgcttgggactgcagcctaaaatgggaggtaaatttcttctaaagctaaatattggca
agaga-ccgatagcgaacaagtactgtgaaggaaagatgaaatagaaccttgaaaagggg
tttaaa-aggaagtgaaattgttaaaagggaaacgtttaaatggggtaaaaattaaattt
gatggaattt--------------------------------------atttttaag---
-------ttttaatcaaatt-------------------------taattat--------
--ggtcaatacggatttttgata-gtataaaagaatattataaacgtacattgatt----
-t---------------ttaattaatgacttatagtatagtatttta-------------
-------------------atactttt-------gaagatttga---------ataa---
----------------------------------------------atttttcaac----
-------------------ataaatttgtagttatttat---------aaaaagtttact
tttctatatttaattt--------------------------------------------
-------------------------------------------ataagttttaaattgaa
agacttt------gttattagatcttaacctttttaaacgacccgtcttgaaacacggac
caaggagtctaacatttaatgcgagtaaataggata--tataaaccta-tatgcgaaatg
aaagtgaattc-----aaggtaggatcatggatttattc--------at-----gagcac
tatcaaccgatctatttgg--a-ttttttcaatagaattgagtcagagcgtaaatgttgg
gacccg-aaagatggtgaa-ctatgcctgaatagggtgaagccagaggaaa-ctct----
----------------ggtggaggctcgta-gcga-------------------------
------------------------------------------------------------
-ttctga-cgtgcaaatcgatcgt-caaatttgggtata-ggggcgaaaga---------
------------------------------------------------------------
------------------------------------------------------------
------------------------------------------------------------
------------------------------------------------------------
------------------------------------------------------------
------------------------------------------------------------
------------------------------------------------------------
------------------------------------------------------------
------------------------------------------------------------
------------------------------------------------------------
------------------------------------------------------------
------------------------------------------------------------
------------------------------------------------------------
------------------------------------------------------------
------------------------------------------------------------
------------------------------------------------------------
------------------------------------------------------------
------------------------------------------------------------
------------------------------------------------------------
------------------------------------------------------------
------------------------------------------------------------
------------------------------------------------------------
------------------------------------------------------------
------------------------------------------------------------
------------------------------------------------------------
------------------------------------------------------------
------------------------------------------------------------
------------------------------------------------------------
------------------------------------------------------------
------------------------------------------------------------
------------------------------------------------------------
------------------------------------------------------------
------------------------------------------------------------
------------------------------------------------------------
------------------------------------------------------------
------------------------------------------------------------
-----------
>JX242599
------------------------------------------------------------
------actaaca-ggattccct--tag-taatggcgaatgaacagggaa--tagctcaa
atttaaaattgt-tt------------------ta-caag-ttgtaatttataga--agt
ttaattaag-cg-ttaaaactgattaaagttggctggaaag-ctactacagagagggtga
tatacccg--taactgattag---attttaatgttaataat-ttttcttcaaagagtcag
gttgcttgggactgcagcctaaaatgggaggtaaatttcttctaaagctaaatattggca
agaga-ccgatagcgaacaagtactgtgaaggaaagatgaaatagaaccttgaaaagggg
tttaaa-aggaagtgaaattgttaaaagggaaacgtttaaatggggtaaaaattaaattt
gatggaattt--------------------------------------atttttaag---
-------ttttaatcaaatt-------------------------taattat--------
--ggtcaatacggatttttgata-gtataaaagaatattataaacgtacattgatt----
-t---------------ttaattaatgacttatagtatagtatttta-------------
-------------------atactttt-------gaagatttga---------ataa---
----------------------------------------------atttttcaac----
-------------------ataaatttgtagttatttat---------aaaaagtttact
tttctatatttaattt--------------------------------------------
-------------------------------------------ataagttttaaattgaa
agacttt------gttattagatcttaacctttttaaacgacccgtcttgaaacacggac
caaggagtctaacatttaatgcgagtaaataggata--tataaaccta-tatgcgaaatg
aaagtgaattc-----aaggtaggatcatggatttattc--------at-----gagcac
tatcaaccgatctatttgg--a-ttttttcaatagaattgagtcagagcgtaaatgttgg
gacccg-aaagatggtgaa-ctatgcctgaatagggtgaagccagaggaaa-ctct----
----------------ggtggaggctcgta-gcga-------------------------
------------------------------------------------------------
-ttctga-cgtgcaaatcgatcgt-caaatttgggtata-ggggcgaaagactaatcgaa
ccatctagtagctggttcctgtcgaagtttccctcaggatagcagaaactcacacaatag
ttttatgaggtaaagcgaatgattagaggacttggggatgttaatattttcaacctattc
tcaaactttgaatctgtaagaagaattttgttacttaa-tgaactaatcatacgaataag
------------------------------------------------------------
------------------------------------------------------------
------------------------------------------------------------
------------------------------------------------------------
------------------------------------------------------------
------------------------------------------------------------
------------------------------------------------------------
------------------------------------------------------------
------------------------------------------------------------
------------------------------------------------------------
------------------------------------------------------------
------------------------------------------------------------
------------------------------------------------------------
------------------------------------------------------------
------------------------------------------------------------
------------------------------------------------------------
------------------------------------------------------------
------------------------------------------------------------
------------------------------------------------------------
------------------------------------------------------------
------------------------------------------------------------
------------------------------------------------------------
------------------------------------------------------------
------------------------------------------------------------
------------------------------------------------------------
------------------------------------------------------------
------------------------------------------------------------
------------------------------------------------------------
------------------------------------------------------------
------------------------------------------------------------
------------------------------------------------------------
------------------------------------------------------------
------------------------------------------------------------
-----------
>JX242597
------------------------------------------------------------
--agagactacca-ggatttcct--tag-taatggcgaatgaacagggaa--tagctcaa
atttaaaattgt-tt------------------ta-caag-ttgtaatttataga--agt
ttaattaag-cg-ttaaaactgattaaagttggctggaaag-ctactacagagagggtga
tatacccg--taactgattag---attttaatgttaataat-ttttcttcaaagagtcag
gttgcttgggactgcagcctaaaatgggaggtaaatttcttctaaagctaaatattggca
agaga-ccgatagcgaacaagtactgtgaaggaaagatgaaatagaaccttgaaaagggg
tttaaa-aggaagtgaaattgttaaaagggaaacgtttaaatggggtaaaaattaaattt
gatggaattt--------------------------------------atttttaag---
-------ttttaatcaaatt-------------------------taattat--------
--ggtcaatacggatttttgata-gtataaaagaatattataaacgtacattgatt----
-t---------------ttaattaatgacttatagtatagtatttta-------------
-------------------atactttt-------gaagatttga---------ataa---
----------------------------------------------atttttcaac----
-------------------ataaatttgtagttatttat---------aaaaagtttact
tttctatatttaattt--------------------------------------------
-------------------------------------------ataagttttaaattgaa
agacttt------gttattagatcttaacctttttaaacgacccgtcttgaaacacggac
caaggagtctaacatttaatgcgagtaaataggata--tataaaccta-tatgcgaaatg
aaagtgaattc-----aaggtaggatcatggatttattc--------at-----gagcac
tatcaaccgatctatttgg--a-ttttttcaatagaattgagtcagagcgtaaatgttgg
gacccg-aaagatggtgaa-ctatgcctgaatagggtgaagccagaggaaa-ctct----
----------------ggtggaggctcgta-gcga-------------------------
------------------------------------------------------------
-ttctga-cgtgcaaatcgatcgt-caaatttgggtata-ggggcgaaagactaatcgaa
ccatctagtagctggttcctgtcga-----------------------------------
------------------------------------------------------------
------------------------------------------------------------
------------------------------------------------------------
------------------------------------------------------------
------------------------------------------------------------
------------------------------------------------------------
------------------------------------------------------------
------------------------------------------------------------
------------------------------------------------------------
------------------------------------------------------------
------------------------------------------------------------
------------------------------------------------------------
------------------------------------------------------------
------------------------------------------------------------
------------------------------------------------------------
------------------------------------------------------------
------------------------------------------------------------
------------------------------------------------------------
------------------------------------------------------------
------------------------------------------------------------
------------------------------------------------------------
------------------------------------------------------------
------------------------------------------------------------
------------------------------------------------------------
------------------------------------------------------------
------------------------------------------------------------
------------------------------------------------------------
------------------------------------------------------------
------------------------------------------------------------
------------------------------------------------------------
------------------------------------------------------------
------------------------------------------------------------
------------------------------------------------------------
------------------------------------------------------------
------------------------------------------------------------
-----------
>JN939188
-------------------------------------taagcatatcaataagcggagga
aaagaaactaacaaggattccct--tag-taatggcgaatgaacagggaa--tagctcaa
atttaaaattgt-tt------------------taccaag-ttgtaatttataga--agt
ttaattaag-cg-ttaaaactgattaaagttggctggaaag-ctactacagagagggtga
tatacccg--taactgattag---attttaatgttaataat-ttttcttcaaagagtcag
gttgcttgggactgcagcctaaaatgggaggtaaatttcttctaaagctaaatattggca
agaga-ccgatagcgaacaagtactgtgaaggaaagatgaaatagaaccttgaaaagggg
tttaaa-aggaagtgaaattgttaaaagggaaacgtttaaatggggtaaaaattaaattt
gatggaattt--------------------------------------atttttaag---
-------ttttaatcaaatt-------------------------taattat--------
--ggtcaatacggatttttgata-gtataaaagaatattataaacgtacattgatt----
-t---------------ttaattaatgacttatagtatagtatttta-------------
-------------------atactttt-------gaagatttga---------ataa---
----------------------------------------------atttttcaac----
-------------------ataaatttgtagttatttat---------aaaaagtttact
tttctatatttaattt--------------------------------------------
-------------------------------------------ataagttttaaattgaa
agacttt------gttattagatcttaacctttttaaacgacccgtcttgaaacacggac
caaggagtctaacatttaatgcgagtaaataggata--tataaaccta-tatgcgaaatg
aaagtgaattc-----aaggtaggatcatggatttattc--------at-----gagcac
tatcaaccgatctatttgg--a-ttttttcaatagaattgagtcagagcgtaaatgttgg
gacccg-aaagatggtgaa-ctatgcctgaatagggtgaagccagaggaaa-ctct----
----------------ggtggaggctcgta-gcga-------------------------
------------------------------------------------------------
-ttctga-cgtgcaaatcgatcgt-caaatttgggtata-ggggcgaaagactaatcgaa
ccatctagtagctggttcctgtcgaagtttccctcaggatagcagaaactcacacaatag
ttttatgaggtaaagcgaatgattagaggacttggggatgttaatattttcaacctattc
tcaaactttgaatctgtaagaagaattttgttacttaattgaacttaatcatacgaat--
------------------------------------------------------------
------------------------------------------------------------
------------------------------------------------------------
------------------------------------------------------------
------------------------------------------------------------
------------------------------------------------------------
------------------------------------------------------------
------------------------------------------------------------
------------------------------------------------------------
------------------------------------------------------------
------------------------------------------------------------
------------------------------------------------------------
------------------------------------------------------------
------------------------------------------------------------
------------------------------------------------------------
------------------------------------------------------------
------------------------------------------------------------
------------------------------------------------------------
------------------------------------------------------------
------------------------------------------------------------
------------------------------------------------------------
------------------------------------------------------------
------------------------------------------------------------
------------------------------------------------------------
------------------------------------------------------------
------------------------------------------------------------
------------------------------------------------------------
------------------------------------------------------------
------------------------------------------------------------
------------------------------------------------------------
------------------------------------------------------------
------------------------------------------------------------
------------------------------------------------------------
-----------
>JX242598
------------------------------------------------------------
------------------------------------------------------------
t-----------------------------------caag-ttgtaatttataga--agt
ttaattaag-cg-ttaaaactgattaaagttggctgggaag-ctactacagagagggtga
tatacccg--taactgattag---attttaatgttaataat-ttttcttcaaagagtcag
gttgcttgggactgcagcctaaaatgggaggtaaatttcttctaaagctaaatattggca
agaga-ccgatagcgaacaagtactgtgaaggaaaga-gaaatagaaccttgaaaagggg
tttaaa-aggaagtgaaattgttaaaagggaaacgtttaaatggggtaaaaattaaattt
gatggaattt--------------------------------------atttttaag---
-------ttttaatcaaatt-------------------------taattat--------
--ggtcaatacggatttttgata-gtataaaagaatattataaacgtacattgatt----
-t---------------ttaattaatgacttatagtatagtatttta-------------
-------------------atactttt-------gaagatttga---------ataa---
----------------------------------------------atttttcaac----
-------------------ataaatttgtagttatttat---------aaaaagtttact
tttctatatttaattt--------------------------------------------
-------------------------------------------ataagttttaaattgaa
agacttt------gttattagatcttaacctttttaaacgacccgtcttgaaacacggac
caaggagtctaacatttaatgcgagtaaataggata--tataaaccta-tatgcgaaatg
aaagtgaattc-----aaggtaggatcatggatttattc--------at-----gagcac
tatcaaccgatctatttgg--a-ttttttcaatagaattgagtcagagcgtaaatgttgg
gacccg-aaagatggtgaa-ctatgcctgaatagggtgaagccagaggaaa-ctct----
----------------ggtggaggctcgta-gcga-------------------------
------------------------------------------------------------
-ttctga-cgtgcaaatcgatcgt-caaatttgggtata-ggggcgaaagactaatcgaa
ccatctagtagctggttcctgtcgaagtttccctcaggatagcagaaactcactcaatag
ttttatgaggtaaagcgaatgattagaggacttggggatgttaat---------------
------------------------------------------------------------
------------------------------------------------------------
------------------------------------------------------------
------------------------------------------------------------
------------------------------------------------------------
------------------------------------------------------------
------------------------------------------------------------
------------------------------------------------------------
------------------------------------------------------------
------------------------------------------------------------
------------------------------------------------------------
------------------------------------------------------------
------------------------------------------------------------
------------------------------------------------------------
------------------------------------------------------------
------------------------------------------------------------
------------------------------------------------------------
------------------------------------------------------------
------------------------------------------------------------
------------------------------------------------------------
------------------------------------------------------------
------------------------------------------------------------
------------------------------------------------------------
------------------------------------------------------------
------------------------------------------------------------
------------------------------------------------------------
------------------------------------------------------------
------------------------------------------------------------
------------------------------------------------------------
------------------------------------------------------------
------------------------------------------------------------
------------------------------------------------------------
------------------------------------------------------------
------------------------------------------------------------
-----------
>JF816223
------------------------------------------ctcaacataagcggagga
aaagaaactaacaaggattccct--tag-taatggcgaatgaacagggaa--tagctcaa
atttaaaattgt-tt------------------ta-caag-ttgtaatttataga--agt
ttaattaag-cg-ttaaaactgattaaagttggctggaaag-ctactacagagagggtga
tatacccg--taactgattag---attttaatgttaataat-ttttcttcaaagagtcag
gttgcttgggactgcagcctaaaatgggaggtaaatttcttctaaagctaaatattggca
agaga-ccgatagcgaacaagtactgtgaaggaaagatgaaatagaaccttgaaaagggg
tttaaa-aggaagtgaaattgttaaaagggaaacgtttaaatggggtaaaaattaaattt
gatggaattt--------------------------------------atttttaag---
-------ttttaatcaaatt-------------------------taattat--------
--ggtcaatacggatttttgata-gtataaaagaatattataaacgtacattgatt----
-t---------------ttaattaatgacttatagtgtagtatttta-------------
-------------------atactttt-------gaagatttga---------ataa---
----------------------------------------------attttttaac----
-------------------ataaatttgtaattatttat---------aaaaagtttact
tttctatatttaattt--------------------------------------------
-------------------------------------------ataagttttaaattgaa
agacttt------gttattagatcttaacctttttaaacgacccgtcttgaaacacggac
caaggagtctaacatttaatgcgagtaaataggata--tataaaccta-tatgcgaaatg
aaagtgaattc-----aaggtaggatcatggatttattc--------at-----gagcac
tatcaaccgatctatctgg--a-ttttttcaatagaattgagtcagagcgtaaatgttgg
gacccg-aaagatggtgaa-ctatgcctgaatagggtgaagccagaggaaa-ctct----
----------------ggtggaggctcgta-gcga-------------------------
------------------------------------------------------------
-ttctga-cgtgcaaatcgatcgt-caaatttgggtata-ggggcgaaagactaatcgaa
ccatctagtagctggtcctgcggtt-----------------------------------
------------------------------------------------------------
------------------------------------------------------------
------------------------------------------------------------
------------------------------------------------------------
------------------------------------------------------------
------------------------------------------------------------
------------------------------------------------------------
------------------------------------------------------------
------------------------------------------------------------
------------------------------------------------------------
------------------------------------------------------------
------------------------------------------------------------
------------------------------------------------------------
------------------------------------------------------------
------------------------------------------------------------
------------------------------------------------------------
------------------------------------------------------------
------------------------------------------------------------
------------------------------------------------------------
------------------------------------------------------------
------------------------------------------------------------
------------------------------------------------------------
------------------------------------------------------------
------------------------------------------------------------
------------------------------------------------------------
------------------------------------------------------------
------------------------------------------------------------
------------------------------------------------------------
------------------------------------------------------------
------------------------------------------------------------
------------------------------------------------------------
------------------------------------------------------------
------------------------------------------------------------
------------------------------------------------------------
------------------------------------------------------------
-----------
>JF816214
----------------------------------------------------------at
gagaagactaacaggattccctt--tag-taatggcgaatga--aaggga--aagctcaa
atttaaaattgt-tt------------------ta-caag-ttgtaatttataga--agt
ttaattaag-cg-ttaaaactgattaaagttggctggaaag-ctactacagagagggtga
tatacccg--taactgattag---attttaatgttaataat-ttttcttcaaagagtcag
gttgcttgggactgcagcctaaaatgggaggtaaatttcttctaaagctaaatattggca
agaga-ccgatagcgaacaagtactgtgaaggaaagatgaaatagaaccttgaaaagggg
tttaaa-aggaagtgaaattgttaaaagggaaacgtttaaatggggtaaaaattaaattt
gatggaattt--------------------------------------atttttaag---
-------ttttaatcaaatt-------------------------taattat--------
--ggtcaatacggatttttgata-gtataaaagaatattataaacgtacattgatt----
-t---------------ttaattaatgacttatagtgtagtatttta-------------
-------------------atactttt-------gaagatttga---------ataa---
----------------------------------------------attttttaac----
-------------------ataaatttgtaattatttat---------aaaaagtttact
tttctatatttaattt--------------------------------------------
-------------------------------------------ataagttttaaattgaa
agacttt------gttattagatcttaacctttttaaacgacccgtcttgaaacacggac
caaggagtctaacatttaatgcgagtaaataggata--tataaaccta-tatgcgaaatg
aaagtgaattc-----aaggtaggatcatggatttattc--------at-----gagcac
tatcaaccgatctatttgg--a-ttttttcaatagaattgagtcagagcgtaaatgttgg
gacccg-aaagatggtgaa-ctatgcctgaatagggtgaagccagaggaaa-ctct----
----------------ggtggaggctcgta-gcga-------------------------
------------------------------------------------------------
-ttctga-cgtgcaaatcgatcgt-caaatttgggtata-ggggcgaaagactaatcga-
--------catctgtgccc-----------------------------------------
------------------------------------------------------------
------------------------------------------------------------
------------------------------------------------------------
------------------------------------------------------------
------------------------------------------------------------
------------------------------------------------------------
------------------------------------------------------------
------------------------------------------------------------
------------------------------------------------------------
------------------------------------------------------------
------------------------------------------------------------
------------------------------------------------------------
------------------------------------------------------------
------------------------------------------------------------
------------------------------------------------------------
------------------------------------------------------------
------------------------------------------------------------
------------------------------------------------------------
------------------------------------------------------------
------------------------------------------------------------
------------------------------------------------------------
------------------------------------------------------------
------------------------------------------------------------
------------------------------------------------------------
------------------------------------------------------------
------------------------------------------------------------
------------------------------------------------------------
------------------------------------------------------------
------------------------------------------------------------
------------------------------------------------------------
------------------------------------------------------------
------------------------------------------------------------
------------------------------------------------------------
------------------------------------------------------------
------------------------------------------------------------
-----------
>JF816224
------------------------------------------------------------
------------------tccct--tag-taatggcgaatgaacagggaa--aagctcaa
atttaaaatcat-tttttttttttaaaat----ta-tgaa-ttgtaatttaaaga--agt
taaatcaaagtt-ttaaaactaattaaaattggctggaaag-ctattacagagagggtga
tatacccg--taactgattag--attttaaaatttaagaat-ttttcttcaaagagtcag
gttgcttgggactgcagcctaaaatgggaggtaaatttcttctaaagctaaatattggca
agaga-ccgatagcgaacaagtactgtgaaggaaagatgaaatagaaccttgaaaagggg
tttaaa-agaaagtgaaattgttaaaagggaaacgtttaaatggggtaaaaattaatttt
aatgaaattt--------------------------------------atttataaa---
-------ttttaattaaaat-------------------------taattat--------
--ggtcaaattaaatttttaata-atatagataaatattataaaggtatattgatttttt
at---------------taaattaataacttatagtataatattttt-------------
-------------------atattttttta----aaagatttaatttaatattataa---
----------------------------------------------ttttttaaac----
-------------------taaaattaaatattatttaa---------caaaagtttact
tttaattaattaatat--------------------------------------------
--------------------------------------------ttagttttaaattaaa
agaaatttaatatttttattgatcttaacttttttaaacgacccgtcttgaaacacggac
caaggagtctaacatttaatgcgagtatttaggaaat-tttaaaccta-tatgcaaaatg
aaagtgaattc-----aaggtaggattattaatttatttataaattaat-----atgcac
tatcaaccgatctatttgg--a-ttttttcaatagaattgagttagagcgtaaatgttgg
gacccg-aaagatggtgaa-ctatgcctgaatagggcgaagccagaggaaa-ctct----
----------------ggtggaggctcgta-gcga-------------------------
------------------------------------------------------------
-ttctga-cgtgcaaatcgatcgt-caaatttgggtata-ggggcgaaagactaatcgaa
gcatcctaaggcccc---------------------------------------------
------------------------------------------------------------
------------------------------------------------------------
------------------------------------------------------------
------------------------------------------------------------
------------------------------------------------------------
------------------------------------------------------------
------------------------------------------------------------
------------------------------------------------------------
------------------------------------------------------------
------------------------------------------------------------
------------------------------------------------------------
------------------------------------------------------------
------------------------------------------------------------
------------------------------------------------------------
------------------------------------------------------------
------------------------------------------------------------
------------------------------------------------------------
------------------------------------------------------------
------------------------------------------------------------
------------------------------------------------------------
------------------------------------------------------------
------------------------------------------------------------
------------------------------------------------------------
------------------------------------------------------------
------------------------------------------------------------
------------------------------------------------------------
------------------------------------------------------------
------------------------------------------------------------
------------------------------------------------------------
------------------------------------------------------------
------------------------------------------------------------
------------------------------------------------------------
------------------------------------------------------------
------------------------------------------------------------
------------------------------------------------------------
-----------
>JF816219
--------------------------------------------------------aggg
gggtagaactaacaggattccct--tag-taatggcgaatgaaccgggaa--aagctcaa
atttaaaatcat-atttttttaaaaaata-------tgaa-ttgtaatttaaaga--agt
taaatcaaa-tt-ttaaaactaattaaagttggctggaaag-ctactacagagagggtga
tatacccg--taactgattag--atttttaaaattaagaat-ttttcttcaaagagtcag
gttgcttgggactgcagcctaaaatgggaggtaaatttcttctaaagctaaatattggca
agaga-ccgatagcgaacaagtactgtgaaggaaagatgaaatagaaccttgaaaagggg
tttaaa-agaaagtgaaattgttaaaagggaaacgtttaaatggggtaaaaattaatttt
aatgaaattt--------------------------------------atttataaa---
-------ttttaattaaaat-------------------------taattat--------
--ggtcaaattaaatttttaata-atatagataaatattatgaaggtatattaattat--
-t---------------ttaattaataacttatagcataatattttt-------------
-------------------atattttt-------aaagatttaa--aaaaaaaaata---
----------------------------------------------ttttttaaac----
-------------------taaaatttaatattatttaa---------caaaagtttact
tttaattaattaatat--------------------------------------------
--------------------------------------------taagttttaaattaaa
agaattttaa-----attttgatcttaacctttttaaacgacccgtcttgaaacacggac
caaggagtctaacatttaatgcgagtatttaggata--attaaaccta-tatgcgaaatg
aaagtgaattc-----aaggtaggattattaaagaattt-ttttttaat-----atgcac
tatcaaccgatctatttgg--a-ttttttcaatagaattgagttagagcataaatgttgg
gacccg-aaagatggtgaa-ctatgcctgaatagggcgaagccagaggaaa-ctct----
----------------ggtggaggctcgta-gcga-------------------------
------------------------------------------------------------
-ttctga-cgtgcaaatcgatcgt-caaatttgggtata--gggcgaaagactaatcgaa
ccatctaggggct-----------------------------------------------
------------------------------------------------------------
------------------------------------------------------------
------------------------------------------------------------
------------------------------------------------------------
------------------------------------------------------------
------------------------------------------------------------
------------------------------------------------------------
------------------------------------------------------------
------------------------------------------------------------
------------------------------------------------------------
------------------------------------------------------------
------------------------------------------------------------
------------------------------------------------------------
------------------------------------------------------------
------------------------------------------------------------
------------------------------------------------------------
------------------------------------------------------------
------------------------------------------------------------
------------------------------------------------------------
------------------------------------------------------------
------------------------------------------------------------
------------------------------------------------------------
------------------------------------------------------------
------------------------------------------------------------
------------------------------------------------------------
------------------------------------------------------------
------------------------------------------------------------
------------------------------------------------------------
------------------------------------------------------------
------------------------------------------------------------
------------------------------------------------------------
------------------------------------------------------------
------------------------------------------------------------
------------------------------------------------------------
------------------------------------------------------------
-----------
>HM593512
------------------------------------------------------------
--------taacaaggattccct--cag-taatggcgaatgaacagggaa--aagctcaa
atttaaaatcgt-aatttttcaaa---------ttacgaa-ttgtaatttaaaga--aaa
ttaattatagta-ataaagcatattaaagttggctggaaag-ctactacagagaaggtga
tatacctg--taactgatatg--attttattattaaaatat-taactttcaaagagtcag
gttgcttgggactgcagcctaaaatgggaggtaaatttcttctaaagctaaatattggta
agaga-ccgatagcgaacaagtaccgtgagggaaagatgaaatagaaccttgaaaagggg
tttaaa-aggaagtgaaattgttaaaagggaaacgcttaaaatgggtaaaaatattatta
aaagaaatgt--------------------------------------ttttaaata---
-------ttttaattaataa-------------------------tgtttat--------
--ggttaatagtaatttttaatg-atataaacgattattataaaggtatgttgaat----
-t---------------ttatttaacaacttatagtataataataat-------------
------------------aatatttttaaa----gattattttt---------ataa---
----------------------------------------------attataaaatga-t
attaaatttattgaaattaattaaatgg--------------------------tttacc
ttttaatttttggctatgaaga--------------------------------------
-------------------------------------------tttaattttattttaaa
aat--tt-----atttattagaccatgact------------------------------
------------------------------------------------------------
------------------------------------------------------------
------------------------------------------------------------
------------------------------------------------------------
------------------------------------------------------------
------------------------------------------------------------
------------------------------------------------------------
------------------------------------------------------------
------------------------------------------------------------
------------------------------------------------------------
------------------------------------------------------------
------------------------------------------------------------
------------------------------------------------------------
------------------------------------------------------------
------------------------------------------------------------
------------------------------------------------------------
------------------------------------------------------------
------------------------------------------------------------
------------------------------------------------------------
------------------------------------------------------------
------------------------------------------------------------
------------------------------------------------------------
------------------------------------------------------------
------------------------------------------------------------
------------------------------------------------------------
------------------------------------------------------------
------------------------------------------------------------
------------------------------------------------------------
------------------------------------------------------------
------------------------------------------------------------
------------------------------------------------------------
------------------------------------------------------------
------------------------------------------------------------
------------------------------------------------------------
------------------------------------------------------------
------------------------------------------------------------
------------------------------------------------------------
------------------------------------------------------------
------------------------------------------------------------
------------------------------------------------------------
------------------------------------------------------------
------------------------------------------------------------
------------------------------------------------------------
-----------
>AF113458
------------------------------------------------------------
--------taacaaggattccct--cag-taatggcgaatgaacagggaa--aagctcaa
atttaaaatcgt-aatttttcaaa---------ttacgaa-ttgtaatttaaaga--aaa
ttaattatagta-ataaagcatattaaagttggctggaaag-ctactacagagaaggtga
tatacctg--taactgatatg--attttattattaaaatat-taactttcaaagagtcag
gttgcttgggactgcagcctaaaatgggaggtaaatttcttctaaagctaaatattggta
agaga-ccgatagcgaacaagtaccgtgagggaaagatgaaatagaaccttgaaaagggg
tttaaa-aggaagtgaaattgttaaaagggaaacgcttaaaatgggtaaaaatattatta
aaagaaatgt--------------------------------------ttttaaata---
-------ttttaattaataa-------------------------tgtttat--------
--ggttaatagtaatttttaatg-atataaacgattattataaaggtatgttgaat----
-t---------------ttatttaacaacttatagtataataataat-------------
------------------aatatttttaaa----gattattttt---------ataa---
----------------------------------------------attataaaatga-t
attaaatttattgaaattaattaaatgg--------------------------tttacc
ttttaatttttggctatgaaga--------------------------------------
-------------------------------------------tttaattttattttaaa
aat--tt-----atttattagaccatgact------------------------------
------------------------------------------------------------
------------------------------------------------------------
------------------------------------------------------------
------------------------------------------------------------
------------------------------------------------------------
------------------------------------------------------------
------------------------------------------------------------
------------------------------------------------------------
------------------------------------------------------------
------------------------------------------------------------
------------------------------------------------------------
------------------------------------------------------------
------------------------------------------------------------
------------------------------------------------------------
------------------------------------------------------------
------------------------------------------------------------
------------------------------------------------------------
------------------------------------------------------------
------------------------------------------------------------
------------------------------------------------------------
------------------------------------------------------------
------------------------------------------------------------
------------------------------------------------------------
------------------------------------------------------------
------------------------------------------------------------
------------------------------------------------------------
------------------------------------------------------------
------------------------------------------------------------
------------------------------------------------------------
------------------------------------------------------------
------------------------------------------------------------
------------------------------------------------------------
------------------------------------------------------------
------------------------------------------------------------
------------------------------------------------------------
------------------------------------------------------------
------------------------------------------------------------
------------------------------------------------------------
------------------------------------------------------------
------------------------------------------------------------
------------------------------------------------------------
------------------------------------------------------------
------------------------------------------------------------
-----------
>JX242594
------------------------------------------------------------
-------------------------cag-taatggcgaatgaacagggaa--aagctcaa
atttaaaatcgt-aatttttcacm---------ttacgaa-ttgtaatttaaaga--aaa
ttaattatagta-ataaagcatattaaagttggctggaaag-ctactacagagaaggtga
tatacctg--taactgatatg--attttattattaaaatat-taactttcaaagagtcag
gttgcttgggactgcagcctaaaatgggaggtaaatttcttctaaagctaaatattggta
agaga-ccgatagcgaacaagtaccgtgagggaaagatgaaatagaaccttgaaaagggg
tttaaa-aggaagtgaaattgttaaaagggaaacgcttaaaatgggtaaaaatattatta
aaagaaatgt--------------------------------------ttttaaata---
-------ttttaattaataa-------------------------tgtttat--------
--ggttaatagtaatttttaatg-atataaacgattattataaaggtatgttgaat----
-t---------------ttatttaacaacttatagtataataataat-------------
------------------aatatttttaaa----gattattttt---------ataa---
----------------------------------------------attataaaatga-t
attaaatttattgaaattaattaaatgg--------------------------tttacc
ttttaatttttggctatgaaga--------------------------------------
-------------------------------------------tttaattttattttaaa
aat--tt-----atttattagaccatgacttttttaagcgacccgtcttgaaacacggac
caaggagtctaacatttatggcgagtaaataggatttaaatataccta-tatgcgaaatg
aaagtgaattc-----aaggtaggaccttttatttaata-------att-----gggcac
tatcaaccgatctatctag--t-ttttattagtagaattgagtaagagcctaaatgttgg
gacccg-aaagatggtgaa-ctatgcctgaatagggtgaagccagaggaaa-ctct----
----------------ggtggaggctcgta-gcga-------------------------
------------------------------------------------------------
-ttctga-cgtgcaaatcgatcgt-caaattt-cgtata-ggggcgaaagactaatcgaa
ccatctagtagctggttcctgccgaagttccccctc------------------------
------------------------------------------------------------
------------------------------------------------------------
------------------------------------------------------------
------------------------------------------------------------
------------------------------------------------------------
------------------------------------------------------------
------------------------------------------------------------
------------------------------------------------------------
------------------------------------------------------------
------------------------------------------------------------
------------------------------------------------------------
------------------------------------------------------------
------------------------------------------------------------
------------------------------------------------------------
------------------------------------------------------------
------------------------------------------------------------
------------------------------------------------------------
------------------------------------------------------------
------------------------------------------------------------
------------------------------------------------------------
------------------------------------------------------------
------------------------------------------------------------
------------------------------------------------------------
------------------------------------------------------------
------------------------------------------------------------
------------------------------------------------------------
------------------------------------------------------------
------------------------------------------------------------
------------------------------------------------------------
------------------------------------------------------------
------------------------------------------------------------
------------------------------------------------------------
------------------------------------------------------------
------------------------------------------------------------
------------------------------------------------------------
-----------
>JN939189
---------------------------------------------------agcggagga
aaagaaactaacaaggattccct--cag-taatggcgaatgaacagggaa--aagctcaa
atttaaaatcgt-aatttttcaaa---------ttacgaa-ttgtaatttaaaga--aaa
ttaattatagta-ataaagcatattaaagttggctggaaag-ctactacagagaaggtga
tatacctg--taactgatatg--attttattattaaaatat-taactttcaaagagtcag
gttgcttgggactgcagcctaaaatgggaggtaaatttcttctaaagctaaatattggta
agaga-ccgatagcgaacaagtaccgtgagggaaagatgaaatagaaccttgaaaagggg
tttaaa-aggaagtgaaattgttaaaagggaaacgcttaaaatgggtaaaaatattatta
aaagaaatgt--------------------------------------ttttaaata---
-------ttttaattaataa-------------------------tgtttat--------
--ggttaatagtaatttttaatg-atataaacgattattataaaggtatgttgaat----
-t---------------ttatttaacaacttatagtataataataat-------------
------------------aatatttttaaa----gattattttt---------ataa---
----------------------------------------------attataaaatga-t
attaaatttattgaaattaattaaatgg--------------------------tttacc
ttttaatttttggctatgaaga--------------------------------------
-------------------------------------------tttaattttatttaaaa
att--------------------------------------------------tat----
------------------------------------------------------------
------------------------------------------------------------
------------------------------------------------------------
------------------------------------------------------------
------------------------------------------------------------
------------------------------------------------------------
------------------------------------------------------------
------------------------------------------------------------
------------------------------------------------------------
------------------------------------------------------------
------------------------------------------------------------
------------------------------------------------------------
------------------------------------------------------------
------------------------------------------------------------
------------------------------------------------------------
------------------------------------------------------------
------------------------------------------------------------
------------------------------------------------------------
------------------------------------------------------------
------------------------------------------------------------
------------------------------------------------------------
------------------------------------------------------------
------------------------------------------------------------
------------------------------------------------------------
------------------------------------------------------------
------------------------------------------------------------
------------------------------------------------------------
------------------------------------------------------------
------------------------------------------------------------
------------------------------------------------------------
------------------------------------------------------------
------------------------------------------------------------
------------------------------------------------------------
------------------------------------------------------------
------------------------------------------------------------
------------------------------------------------------------
------------------------------------------------------------
------------------------------------------------------------
------------------------------------------------------------
------------------------------------------------------------
------------------------------------------------------------
------------------------------------------------------------
------------------------------------------------------------
-----------
>JF816215
----------------------------------------------------------at
aaaagcaattaccaagactccct--tag-taatggcgaatgaaccgggat--aagctcaa
atttaaaatcat-ttgaaa--------------aaatgaa-ttgtagtttaagaa--tgt
ttaattaaaaat-tctgaatgtattaa-tttagttggaaag-ctaaaacaaagagggtta
tattcccg--tat---acata--caagaaggggttgataat-tattcattaaagagtcag
attgtttgggattacagtctaaatatggaggtaaatttcttcaaaagctaagtataaaaa
ggaga-ccgatagcgaacaagtaccgtaagggaaagatgaaatagaaccttgtaaagggg
tttaaacagaaagtgaaatcgttaagagggaaacatttaaaacttgaattaaa-------
-----------------------------------------------------tgta---
-------ataactttggtgctcgcaccatg-----tgttttttcattttaaa--------
--tatcaatggttattgtttttgcttaaaaatggatttaataacaaggt-ttttatcaaa
gt-----ataaaaacttaaaaattagattttattaagtgattatgat-------------
--------atta----caatcatttttaac-----------ttt---------cata---
----------------------------------------------gtttttttatta-g
acaataatct-------ttttaagattagtg----------------------tttaaat
agaaattctacaggttttatgg--------------------------------------
-------------------------------------------tataaacattgataata
gag--tt--------------------------ttaaatgacccgtcttgaaacacggac
caaggagtctaacatat-cggcgagtactatat-----tttgaaaatataatgcgaaatg
aaagtaaattc-----aaggtaggaattttta------------attaa-----atgcac
tatcgaccgatttcatcagg-a-ttcttcctagaaatttgagttagagcagacatgttgg
gacccg-aaagatggtgaa-ctatgcttgaatagggtgaagccagaggaaa-ctct----
----------------ggtggaagctcgta-gcga-------------------------
------------------------------------------------------------
-ttctga-cgtgcaaatcgatcgt-aaaatttgggtata--gggcgaaagactaatcgaa
cagcagcgcat-------------------------------------------------
------------------------------------------------------------
------------------------------------------------------------
------------------------------------------------------------
------------------------------------------------------------
------------------------------------------------------------
------------------------------------------------------------
------------------------------------------------------------
------------------------------------------------------------
------------------------------------------------------------
------------------------------------------------------------
------------------------------------------------------------
------------------------------------------------------------
------------------------------------------------------------
------------------------------------------------------------
------------------------------------------------------------
------------------------------------------------------------
------------------------------------------------------------
------------------------------------------------------------
------------------------------------------------------------
------------------------------------------------------------
------------------------------------------------------------
------------------------------------------------------------
------------------------------------------------------------
------------------------------------------------------------
------------------------------------------------------------
------------------------------------------------------------
------------------------------------------------------------
------------------------------------------------------------
------------------------------------------------------------
------------------------------------------------------------
------------------------------------------------------------
------------------------------------------------------------
------------------------------------------------------------
------------------------------------------------------------
------------------------------------------------------------
-----------
>EF392383
------------------------------------------------------------
---ggagattactaagattccct--cagctaatggcgaatgaaccgggaa--aagctcaa
atttaaaatcat-ttatca--------------aaatgaa-ttgtagtttaagaa--tgt
ttaattaaaaat-gttaagcctattaa-ttcaattggaaaa-ttgaaacatagagggtta
tattcccg--tat---atgtaggtacttgatatttaataat-tattcattaaagagtcag
attgtttgggattacagtctaaattaggaggtaaatttcttttaaagctaaatattggta
ggaga-ccgatagcgaacaagtaccgtaagggaaagatgaaatagaaccttgtaaagggg
tttaaacagaaagtgaaatcgttaagagggaaacatttaaaactcgaactaaaggaacaa
atattgatgt--------------------------------------aatt-taca---
-------acaaattttggacc------------------------ttttaaa--------
--tctcaataattattatttttggttaaaaattgtttttataacaaggt-ttcattcaac
gt-----attgaaacttaaaagtaaatgtcaattaactaattatgat-------------
--------atta----aacctatttattac----a-----cctt---------catg---
----------------------------------------------tttttattactg-a
acagcaatct-------ttttaagattattg----------------------ttcaact
aattcgaacacaggtgctatgg--------------------------------------
-------------------------------------------gaaaaatattgataata
gag--tt--------------------------ttaaatgacccgtcttgaaacacggac
caaggagtctaacatat-ctgcaagtactataa-----tttcaaattataatgcgcaatg
aaagtaaattc-----aaggtaagagttttttattaa-----------------atgcac
taccgaccgatttcatcagg-a-ttcttcctagaaatttgagttagagcagacatgttgg
gacccg-aaagatggtgaa-ctatgcttgaatagggtgaagccagaggaaa-ctct----
----------------ggtggaagctcgta-gcga-------------------------
------------------------------------------------------------
-ttctga-cgtgcaaatcgatcgt-aaaatttgggtatagggggcgaaagactatcg---
------------------------------------------------------------
------------------------------------------------------------
------------------------------------------------------------
------------------------------------------------------------
------------------------------------------------------------
------------------------------------------------------------
------------------------------------------------------------
------------------------------------------------------------
------------------------------------------------------------
------------------------------------------------------------
------------------------------------------------------------
------------------------------------------------------------
------------------------------------------------------------
------------------------------------------------------------
------------------------------------------------------------
------------------------------------------------------------
------------------------------------------------------------
------------------------------------------------------------
------------------------------------------------------------
------------------------------------------------------------
------------------------------------------------------------
------------------------------------------------------------
------------------------------------------------------------
------------------------------------------------------------
------------------------------------------------------------
------------------------------------------------------------
------------------------------------------------------------
------------------------------------------------------------
------------------------------------------------------------
------------------------------------------------------------
------------------------------------------------------------
------------------------------------------------------------
------------------------------------------------------------
------------------------------------------------------------
------------------------------------------------------------
------------------------------------------------------------
-----------
>JX242596
-----------------------------------actaagcatatcattaagcagagga
aaagaaattaactaagattccct--cag-taatggcgaatgaaccgggaa--aagctcaa
atttaaaatcat-ttatca--------------aaatgaa-ttgtagtttaagaa--tgt
ttaattaaaaat-gttaagcctattaa-ttcaattggaaaa-ttgaaacatagagggtta
tattcccg--tat---atgtaggtacttgatatttaataat-tattcattaaagagtcag
attgtttgggattacagtctaaattaggaggtaaatttcttttaaagctaaatattggta
ggaga-ccgatagcgaacaagtaccgtaagggaaagatgaaatagaaccttgtaaagggg
tttaaacagaaagtgaaatcgttaagagggaaacatttaaaactcgaactaaaggaacaa
atattgatgt--------------------------------------aatt-taca---
-------acaaattttggacc------------------------ttttaaa--------
--tctcaataattattatttttggttaaaaattgtttttataacaaggt-ttcattcaac
gt-----attgaaacttaaaagtaaatgtcaattaactaattatgat-------------
--------atta----aacctatttattac----a-----cctt---------catg---
----------------------------------------------tttttattactg-a
acagcaatct-------ttttaagattattg----------------------ttcaact
aattcgaacacaggtgctatgg--------------------------------------
-------------------------------------------gaaaaatattgataata
gag--tt--------------------------ttaaatgacccgtcttgaaacacggac
caaggagtctaacatat-ctgcaagtactataa-----tttcaaattataatgcgcaatg
aaagtaaattc-----aaggtaagagttttttattaa-----------------atgcac
taccgaccgatttcatcagg-a-ttcttcctagaaatttgagttagagcagacatgttgg
gacccg-aaagatggtgaa-ctatgcttgaatagggtgaagccagaggaaa-ctct----
----------------ggtggaagctcgta-gcga-------------------------
------------------------------------------------------------
-ttctga-cgtgcaaatcgatcgt-aaaatttgggtata--gggcgaaagactaa-----
------------------------------------------------------------
------------------------------------------------------------
------------------------------------------------------------
------------------------------------------------------------
------------------------------------------------------------
------------------------------------------------------------
------------------------------------------------------------
------------------------------------------------------------
------------------------------------------------------------
------------------------------------------------------------
------------------------------------------------------------
------------------------------------------------------------
------------------------------------------------------------
------------------------------------------------------------
------------------------------------------------------------
------------------------------------------------------------
------------------------------------------------------------
------------------------------------------------------------
------------------------------------------------------------
------------------------------------------------------------
------------------------------------------------------------
------------------------------------------------------------
------------------------------------------------------------
------------------------------------------------------------
------------------------------------------------------------
------------------------------------------------------------
------------------------------------------------------------
------------------------------------------------------------
------------------------------------------------------------
------------------------------------------------------------
------------------------------------------------------------
------------------------------------------------------------
------------------------------------------------------------
------------------------------------------------------------
------------------------------------------------------------
------------------------------------------------------------
-----------
>FJ545245
--------------------------------gaacttaagcatatcattaagcagagga
aaagaaattaactaagattccct--cag-taatggcgaatgaaccgggaa--aagctcaa
atttaaaatcat-ttatca--------------aaatgaa-ttgtagtttaagaa--tgt
ttaattaaaaat-gttaagcctattaa-ttcaattggaaaa-ttgaaacatagagggtta
tattcccg--tat---atgtaggtacttgatatttaataat-tattcattaaagagtcag
attgtttgggattacagtctaaattaggaggtaaatttcttttaaagctaaatattggta
ggaga-ccgatagcgaacaagtaccgtaagggaaagatgaaatagaaccttgtaaagggg
tttaaacagaaagtgaaatcgttaagagggaaacatttaaaactcgaactaaaggaacaa
atattgatgt--------------------------------------aatt-taca---
-------acaaattttggacc------------------------ttttaaa--------
--tctcaataattattatttttggttaaaaattgtttttataacaaggt-ttcattcaac
gt-----attgaaacttaaaagtaaatgtcaattaactaattatgat-------------
--------atta----aacctatttattac----a-----cctt---------catg---
----------------------------------------------tttttattactg-a
acagcaatct-------ttttaagattattg----------------------ttcaact
aattcgaacacaggtgctatgg--------------------------------------
-------------------------------------------gaaaaatattgataat-
------------------------------------------------------------
------------------------------------------------------------
------------------------------------------------------------
------------------------------------------------------------
------------------------------------------------------------
------------------------------------------------------------
------------------------------------------------------------
------------------------------------------------------------
------------------------------------------------------------
------------------------------------------------------------
------------------------------------------------------------
------------------------------------------------------------
------------------------------------------------------------
------------------------------------------------------------
------------------------------------------------------------
------------------------------------------------------------
------------------------------------------------------------
------------------------------------------------------------
------------------------------------------------------------
------------------------------------------------------------
------------------------------------------------------------
------------------------------------------------------------
------------------------------------------------------------
------------------------------------------------------------
------------------------------------------------------------
------------------------------------------------------------
------------------------------------------------------------
------------------------------------------------------------
------------------------------------------------------------
------------------------------------------------------------
------------------------------------------------------------
------------------------------------------------------------
------------------------------------------------------------
------------------------------------------------------------
------------------------------------------------------------
------------------------------------------------------------
------------------------------------------------------------
------------------------------------------------------------
------------------------------------------------------------
------------------------------------------------------------
------------------------------------------------------------
------------------------------------------------------------
------------------------------------------------------------
------------------------------------------------------------
-----------
>JN131540
---------------------------------------------------------aat
tattagattaactaagatt-cct--tag-taatggcgaatgaaccgggaa--aagctcaa
atttaaaatcat-ttaaca--------------aaatgaa-ttgtagtttaaaaa--tgt
ttaattaaaaat-tttaaatttattaa-tttaattggaaaa-ttaaaacaaagagggtta
tattcccg--tat---atataaatstataaaatttaataat-tattcattaaagagtcag
attgtttgggattacagtctaaattaggaggtaaatttcttttaaagctaaatattggca
agaga-ccgatagcgaacaagtaccgtaagggaaagatgaaatagaaccttgtaaagggg
tttaaacagaaagtgaaatcgttaagagggaaacatttaaaactcgaaataaaattttaa
--attattat--------------------------------------aatt-tata---
-------ataaaatttaaaat------------------------ttttaaa--------
--tctcaataattattaaatttgtttaaaaattaatattataacaaggt-ttcaatcaaa
gt-----atttaaacttaaaaataatattttattaaacgaaattgat-------------
--------aataa--taaatcatttattac----a-----tttt---------cata---
----------------------------------------------ttwttattatta-a
ttaataatct-------ttttaagattaata----------------------attaaat
aatttaaatacaaatgatatga--------------------------------------
-------------------------------------------tatttatattgataata
gag--tt--------------------------ttaaatgacccgtcttgaaacacggac
caaggagtctaacatat-cggcgagtactataat----taaaaaattataatgcgtaatg
aaagtaaattc-----aaggtaggaatttttaattaa-----------------atgcac
tatcgaccgatttcattagg-a-ttcttcctagaaatttgagttagagcagacatgttgg
gacccg-aaagatggtgaa-ctatgcttgaatagggtgaagccagaggaaa-ctct----
----------------ggtggaagctcgta-gcga-------------------------
------------------------------------------------------------
-ttctga-cgtgcaaatcgatcgt-aaaatttgggtata--gggcgaaagactaatcgat
ccatccaggcgt------------------------------------------------
------------------------------------------------------------
------------------------------------------------------------
------------------------------------------------------------
------------------------------------------------------------
------------------------------------------------------------
------------------------------------------------------------
------------------------------------------------------------
------------------------------------------------------------
------------------------------------------------------------
------------------------------------------------------------
------------------------------------------------------------
------------------------------------------------------------
------------------------------------------------------------
------------------------------------------------------------
------------------------------------------------------------
------------------------------------------------------------
------------------------------------------------------------
------------------------------------------------------------
------------------------------------------------------------
------------------------------------------------------------
------------------------------------------------------------
------------------------------------------------------------
------------------------------------------------------------
------------------------------------------------------------
------------------------------------------------------------
------------------------------------------------------------
------------------------------------------------------------
------------------------------------------------------------
------------------------------------------------------------
------------------------------------------------------------
------------------------------------------------------------
------------------------------------------------------------
------------------------------------------------------------
------------------------------------------------------------
------------------------------------------------------------
-----------
>JN131541
-----------------------------------------------------ggagcag
gaatgaattaactaagattccct--tag-taatggcgaatgaaccgggaa--aagctcaa
atttaaaatcat-ttaaca--------------aaatgaa-ttgtagtttaaaaa--tgt
ttaattaaaaat-tttaaatttattaa-tttaattggaaaa-ttaaaacaaagagggtta
tattcccg--tat---atataaatctataaaatttaataat-tattcattaaagagtcag
attgtttgggattacagtctaaattaggaggtaaatttcttttaaagctaaatattggca
agaga-ccgatagcgaacaagtaccgtaagggaaagatgaaatagaaccttgtaaagggg
tttaaacagaaagtgaaatcgttaagagggaaacatttaaaactcgaaataaaatattaa
--attattat--------------------------------------aatt-tata---
-------ataaaatttaaaat------------------------ttttaaa--------
--tctcaataattattaaatttgtttaaaaattaatattataacaaggt-ttcaatcaaa
gt-----atttaaacttaaaaataatattttattaaacgaaattgat-------------
--------aataa--taaatcatttattac----a-----tttt---------cata---
----------------------------------------------tttttattatta-a
ttaataatct-------ttttaagattaata----------------------attaaat
aatttaaatacaaatgatatga--------------------------------------
-------------------------------------------tataaatattgataata
gag--tt--------------------------ttaaatgacccgtcttgaaacacggac
caaggagtctaacatat-cggcgagtactataat----taaaaaattataatgcgtaatg
aaagtaaattc-----aaggtaggaatttttaattaa-----------------atgcac
tatcgaccgatttcattagg-a-ttcttcctagaaatttgagttagagcagacatgttgg
gacccg-aaagatggtgaa-ctatgcttgaatagggtgaagccagaggaaa-ctct----
----------------ggtggaagctcgta-gcga-------------------------
------------------------------------------------------------
-ttctga-cgtgcaaatcgatcgt-aaaatttgggtata-ggggcgaaagactaatcgat
ccatcttagttcgctaa-------------------------------------------
------------------------------------------------------------
------------------------------------------------------------
------------------------------------------------------------
------------------------------------------------------------
------------------------------------------------------------
------------------------------------------------------------
------------------------------------------------------------
------------------------------------------------------------
------------------------------------------------------------
------------------------------------------------------------
------------------------------------------------------------
------------------------------------------------------------
------------------------------------------------------------
------------------------------------------------------------
------------------------------------------------------------
------------------------------------------------------------
------------------------------------------------------------
------------------------------------------------------------
------------------------------------------------------------
------------------------------------------------------------
------------------------------------------------------------
------------------------------------------------------------
------------------------------------------------------------
------------------------------------------------------------
------------------------------------------------------------
------------------------------------------------------------
------------------------------------------------------------
------------------------------------------------------------
------------------------------------------------------------
------------------------------------------------------------
------------------------------------------------------------
------------------------------------------------------------
------------------------------------------------------------
------------------------------------------------------------
------------------------------------------------------------
-----------
>JF816225
------------------------------------------------------------
agaagaattaactaagattccct--tag-taatggcgaatgaaccgggaa--aagctcaa
atttaaaatcat-atacca--------------atatgaa-ttgtagtttaagaa--tgt
ttaattacgagt-tatcgatacattaa-tttaactggaaag-ttaaaacatagagggtta
aattcccg--tat---atatgtatttaaataactttataat-ttttcatttaagagtcag
attgtttgggattacagtctaaattaggaggtaaatttcttttaaagctaaatattagcg
agaga-ccgatagcgaacaagtaccgtaagggaaagatgaaatagaaccttgtaaagggg
tttaaacagaaagtgaaatcgttaagagggaaacatttaaaacttgaaattgataactaa
atagaagtat--------------------------------------acttgtata---
-------ttttgttttagttg------------------------tctataa--------
--tatcaatagttattattgtcgtttaagaattgtaagtacaaaaatataatgaatcttc
gg-----atttgttaataaaagtatttatgtattaaatgatagtgat-------------
--------aata---ccaatcattttcttc----ggacatcttt---------taga---
----------------------------------------------tctttactatta-a
gcaataattt-------ttttaaaattaatg----------------------tttaaat
agtttagatacaggtgctatga--------------------------------------
-------------------------------------------tataaatattgataata
gag--gt--------------------------ttaaatgacccgtcttgaaacacggac
caaggagtctaacatat-cggcgagtactatag-----ttttaaactataatgcgaaatg
aaagtaaattc-----aaggtaggaatttttatta-------------------atgcac
tatcgaccgatttcatctgg-a-ttcttctaggaaatttgagttagagcagatatgttgg
gacccg-aaagatggtgaa-ctatgcttgaatagggtgaagccagaggaaa-ctct----
----------------ggtggaagctcgta-gcga-------------------------
------------------------------------------------------------
-ttctga-cgtgcaaatcgatcgt-aaaatttgggtata-ggggcgaaagactaatcgaa
ccat--------------------------------------------------------
------------------------------------------------------------
------------------------------------------------------------
------------------------------------------------------------
------------------------------------------------------------
------------------------------------------------------------
------------------------------------------------------------
------------------------------------------------------------
------------------------------------------------------------
------------------------------------------------------------
------------------------------------------------------------
------------------------------------------------------------
------------------------------------------------------------
------------------------------------------------------------
------------------------------------------------------------
------------------------------------------------------------
------------------------------------------------------------
------------------------------------------------------------
------------------------------------------------------------
------------------------------------------------------------
------------------------------------------------------------
------------------------------------------------------------
------------------------------------------------------------
------------------------------------------------------------
------------------------------------------------------------
[truncated: 613,164 more chars]
