# Supplementary material for: Phylogenetic Revision and Patterns of Host Specificity in the Fungal Subphylum Entomophthoromycotina
Source: Microorganisms. 2022 Jan 24;10(2):256. doi: 10.3390/microorganisms10020256 (PMC8879804; doi:10.3390/microorganisms10020256)
Supplement: Supplementary file 1 [file microorganisms-10-00256-s001.zip › Table S3.xlsx]

## Sheet: Table S3
Table S3: Matrix of all host taxa (rows) with recorded parasitizations by entomophthoromycotan species (columns). The host species are listed according to their taxonomic classifications, the letter "1" indicates a match between host taxon and documented parasitizations by the respective indicated entomophthoromycotan species. Full references for the host parasitization records are given in the n…
			Host species			1.	2.	3.	4.	5.	6.	7.	8.	9.	10.	11.	12.	13.	14.	15.	16.	17.	18.	19.	20.	21.	22.	23.	24.	25.	26.	27.	28.	29.	30.	31.	32.	33.	34.	35.	36.	37.	38.	39.	40.	41.	42.	43.	44.
Entomophthoromycotan species						Basidiobolus haptosporus	Basidiobolus microsporus	Basidiobolus ranarum	Schizangiella serpentis	Conidiobolus coronatus	Conidiobolus lamprauges	Conidiobolus obscurus	Conidiobolus osmodes	Conidiobolus incongruus	Conidiobolus pseudapiculatus	Conidiobolus thromboides	Conidiobolus sp.	Batkoa apiculata	Batkoa dysderci	Batkoa gigantea	Batkoa major	Zoophthora anglica	Zoophthora aphidis	Zoophthora occidentalis	Zoophthora phalloides	Zoophthora phytonomi	Zoophthora radicans	Furia gastropachae	Furia pieris	Furia virescens	Pandora blunckii	Pandora delphacis	Pandora gammae	Pandora heteropterae	Pandora kondoiensis	Pandora neoaphidis	Pandora nouryi	Pandora uroleuconii	Erynia aquatica	Erynia conica	Erynia curvispora	Erynia delphacis	Erynia erinacea	Erynia rhizospora	Eryniopsis caroliniana	Eryniopsis lampyridarum	Eryniopsis ptychopterae	Massospora cicadina	Orthomyces aleyrodis
1.	Chelicerata	Acari	Mesostigmata	Digamasellidae	Dendrolaelaps sp.					1
2.				Parasitidae	Leptogamasus obesus	1
3.			Prostigmata	Eriophyidae	Abacarus hystrix
4.					Aculodes dubius
5.					Aculodes mckenziei
6.				Tetranychidae	Atrichoproctus cf. uncinatus
7.					Bryobia sp.
8.					Eutetranychus banksi
9.					Eutetranychus sexmaculatus
10.					Mononychellus planki
11.					Mononychellus tanajoa
12.					Oligonychus gossypii
13.					Oligonychus hondoensis
14.					Oligonychus pratensis
15.					Panonychus citri
16.					Tetranychus cinnabarinus
17.					Tetranychus desertorum
18.					Tetranychus evansi
19.					Tetranychus gigas
20.					Tetranychus ludeni
21.					Tetranychus paciﬁcus
22.					Tetranychus tumidus
23.					Tetranychus urticae
24.	Hexapoda	Collembola	Arthropleona	Isotomidae	Isotoma anglicana					1
25.				Entomobryidae	Orchesella cincta					1
26.					Orchesella villosa
27.			Symphypleona	Bourletiellidae	Deuterosminthurus sulphureus
28.				Dicyrtomidae	Dicyrtoma sp.					1
29.				Sminthuridae	Sminthurus viridis					1
30.		Dermaptera	Forficulina	Forficulidae	Doru lineare																																1
31.		Orthoptera	Caelifera	Acrididae	Abacris dilecta
32.					Abacris flavolineata
33.					Arphia pseudonietana
34.					Baeacris (Dichroplus) punctulatus
35.					Camnula pellucida
36.					Camnula sp.
37.					Campylacantha sp.
38.					Dichroplus elongatus
39.					Dichroplus pratensis
40.					Dissosteira carolina
41.					Hesperotettix viridus
42.					Melanoplus bivittatus
43.					Melanoplus cuneatus
44.					Melanoplus differntialis
45.					Melanoplus ﬂavidus
46.					Melanoplus infantilis
47.					Melanoplus mexicanus
48.					Melanoplus packardii
49.					Melanoplus sanguinipes
50.					Melanoplus sp.
51.					Mermiria sp.
52.					Netrosoma fusiformis
53.					Parapodisma sp.
54.					Phaedrotettix angustipennis
55.					Phoetaliotes nebrascensis
56.					Praxibulus sp.
57.					Rhammatocerus brasiliensis
58.					Rhammatocerus bruneri
59.				Pyrgomorphidae	Zonocerus variegatus
60.		Psocoptera	Psocomorpha	Ectopsocidae	Ectopsocus californicus																																1
61.				Pseudocaeciliidae	Heterocaecilius sp.																																1
62.					Lipaphis erysimi																																1
63.					Therioaphis maculata																																1
64.		Hemiptera	Cicadomorpha	Cercopidae	Mahanarva fimbriolata													1
65.				Cicadellidae	Cicadella sp.
66.					Empoasca fabae					1						1					1						1					1
67.					Empoasca flavescens																						1
68.					Empoasca kraemeri																						1
69.					Empoasca vitis																						1
70.					Hauptida distinguenda																						1
71.					Magicicada septendecim																																											1
72.					Molopopterus theae																						1
73.					Nephotettix bipunctata cincticeps					1																						1
74.					Nephotettix lugens																											1
75.					Recilia dorsalis																											1
76.					Typhlocybina sp.																						1
77.				Cicadidae	Cicadetta puer
78.				Membracidae	Spissistilus festinus																											1										1
79.			Fulgoromorpha	Delphacidae	Delphacodes kuscheli					1
80.					Delphacodes haywardii					1
81.					Nilaparvata lugens					1																	1					1										1
82.					Sogatella furcifera																											1
83.					Sogatella pusanus																											1
84.					Sogates oryzicola																											1
85.			Heteroptera	Lygaeidae	Geocoris punctipes																													1
86.				Miridae	Dicyphus pallidus																						1
87.					Lygus lineolaris																													1
88.					Notostira elongata																	1								1
89.				Pentatomidae	Acrosternum hilare																													1
90.				Pyrrocoridae	Dysdercus sp.														1
91.				Thaumastocoridae	Thaumastocoris peregrinus																						1
92.			Sternorrhyncha	Aleyrodidae	Tentraleurodes acaciae
93.					Trialeurodes abutilonea																																												1
94.				Anoecidae	Anoecia corni																		1
95.				Aphididae	Acyrthosiphon kondoi							1						1																	1		1
96.					Acyrthosiphon pelargonii																															1
97.					Acyrthosiphon pisum					1		1				1								1			1									1
98.					Aphidula sp.																															1
99.					Aphis acetosae																															1		1
100.					Aphis arrnata							1
101.					Aphis craccae
102.					Aphis craccivora
103.					Aphis fabae							1				1																				1
104.					Aphis frangulae gossippi																															1
105.					Aphis glycines											1
106.					Aphis gossypii											1
107.					Aphis idaei																															1
108.					Aphis nasturtii
109.					Aphis pomi							1											1													1
110.					Aphis rumicis
111.					Aphis sambuci							1																								1
112.					Aphis symphyti
113.					Aphis umbrella																																							1
114.					Aphis urticata																															1
115.					Brachycaudus cardui																															1
116.					Brachycaudus helichrysi																															1
117.					Brachycaudus lychnidis																															1
118.					Brachycorynella asparagi																															1
119.					Brevicoryne brassicae							1						1							1		1									1
120.					Capitophorus carduinus
121.					Capitophorus elaeagni																						1
122.					Capitophorus horni																															1
123.					Cavariella aegopodii							1																								1
124.					Cavariella pastinacae							1																								1
125.					Cavariella theobaldi							1				1																				1
126.					Chaetosiphon fragaefolii
127.					Chaetosiphon tetrarhodum																															1
128.					Cinara pilicornis																				1											1
129.					Cryptomyzus gaelopsidis																															1
130.					Cryptomyzus korschelti
131.					Cryptomyzus ribis																															1
132.					Dactynotus formosanus																															1
133.					Diuraphis noxia											1											1									1
134.					Diuraphis tritici											1
135.					Dysaphis plantaginea
136.					Dysaphis sp.																															1
137.					Elatobium abietinum
138.					Hyadaphis foeniculi
139.					Hyalopteroides humidis																															1
140.					Hyalopterus pruni																															1
141.					Hyperomyzus lactucae																															1
142.					Lipaphis erysimi																															1
143.					Macrosiphoniella artemisiae							1																								1
144.					Macrosiphum akebiae																															1
145.					Macrosiphum euphorbiae							1				1		1						1			1									1
146.					Macrosiphum funestum																															1
147.					Macrosiphum rosae							1																								1
148.					Megoura viciae							1
149.					Metopolophium dirhodum					1		1				1																				1
150.					Metopolophium festucae																															1
151.					Microlophium carnosum							1																								1
152.					Microlophium primulae																															1
153.					Myzus ascalonicus													1																		1
154.					Myzus cerasi																		1													1
155.					Myzus persicae					1		1				1		1									1									1
156.					Myzus rannaculinum																				1
157.					Myzus nicotinae																															1
158.					Myzus sp.							1																								1
159.					Nasanovia compositellae																															1
160.					Nasonovia ribisnigri							1															1									1
161.					Neotoxoptera formosana					1
162.					Ovatus crataegarius
163.					Pterocomma salicis
164.					Rhopalosiphum insertum											1
165.					Rhopalosiphum maidis							1						1																		1
166.					Rhopalosiphum padi							1						1					1													1
167.					Schizaphis graminum											1											1									1
168.					Schizaphis rufula																															1
169.					Sitobion avenae							1				1											1									1
170.					Sitobion fragariae																															1
171.					Therioaphis maculata							1				1											1
172.					Therioaphis trifolii																						1
173.					Uroleucon aeneum							1																								1		1
174.					Uroleucon campanulae							1																								1
175.					Uroleucon erigeronensis																															1
176.					Uroleucon formosanus																															1
177.					Uroleucon tanaceti																			1												1
178.					Uroleucon sp.							1				1
179.				Pemphigidae	Prociphilus xylostei
180.				Pseudococcidae	Phenacoccus herreri
181.				Drepanosiphidae	Callipterinella calliptera																															1
182.					Chaitophorus leucomelas																						1
183.					Drepanosiphon aceris																						1
184.					Drepanosiphon platanoidis
185.					Euceraphis betulae
186.					Eukalipterus tiliae																															1
187.					Periphyllus testudinaceus																															1
188.					Phyllaphis fagi																															1
189.					Therioaphis trifolii											1
190.					Tuberolachnus salignus
191.				Psyllidae	Gyropsylla spegazziniana																						1
192.					Psyllida etrioza																						1
193.		Isoptera		Rhinotermitidae	Coptotermes curvignathus					1							1
194.					Coptotermes formosanus					1
195.					Coptotermes gestroi					1
196.					Reticulitermes flavipes					1
197.					Reticulitermes lucifugus					1
198.				Termitidae	Nasutitermes corniger					1		1
199.		Thysanoptera	Terebrantia	Thripidae	Frankliniella occidentalis					1
200.					Tagetes erecta					1
201.					Thrips tabaci
202.		Hymenoptera	Symphyta	Diprionidae	Neodiprion tsugae																						1
203.		Diptera	Brachycera	Agromyzidae	Leptohylemya coarctata
204.				Anthomyiidae	Anthomyia liturata
205.					Botanophila fugax
206.					Delia antiqua
207.					Delia brassicae
208.					Delia coarctata
209.					Delia floralis
210.					Delia florilega
211.					Delia platura
212.					Delia radicum																						1
213.					Hylemya vagans
214.					Paradelia intersecta
215.					Paregle audacula
216.					Pegoplata aestiva
217.					Pegoplata inﬁrma
218.					Subhylemyia longula
219.				Calliphoridae	Bellardia viarum
220.					Phaenicia sericata
221.					Pollenia rudis
222.				Drosophilidae	Drosophila melanogaster
223.				Fanniidae	Fannia armata
224.					Fannia canicularis
225.					Fannia glaucescens
226.					Fannia scalaris
227.				Muscidae	Coenosia tigrina
228.					Helina communis
229.					Helina setiventris
230.					Musca domestica
231.					Myospila meditabunda
232.					Ophyra aenescens
233.					Ophyra leucostoma
234.					Phaonia incana
235.					Phaonia perdita
236.					Phaonia subventa
237.					Platycheirus clypeatus
238.					Pollenia rudis
239.					Spilogona dispar
240.					Stomoxys calcitrans
241.				Psilidae	Chamaepsila rosae
242.					Psila rosae										1
243.				Psychodidae	Lutzomyia sordelli					1
244.					Phlebotomus papatasi					1
245.				Sarcophagidae	Sarcophaga haemorrhoidalis
246.				Scatophagidae	Scatophaga stercoraria
247.				Sciaridae	Lycoriella ingenua					1
248.				Simuliidae	Simulium molestus
249.				Stratiomyidae	Chorisops tibialis																						1
250.				Syrphidae	Melanostoma mellinum
251.					Melanostoma scalare
252.					Platycheirus clypeatus
253.					Triglyphus primus
254.			Nematoceren	Culicidae	Aedes aegypti
255.					Aedes excrucians																																		1
256.					Aedes fitchii																																		1
257.					Aedes intrudens																																		1
258.					Aedes provocans																																		1
259.					Aedes simulans																																		1
260.					Anopheles sp.													1
261.					Culex pipiens											1
262.				Ptychopteridae	Ptychoptera contaminata																																										1
263.				Sciaridae	Bradysia paupera													1
264.				Simuliidae	Simulium decorum																																				1
265.					Simulium venustum																																			1
266.					Simulium verecundum/rostratum																																			1
267.					Simulium vittatum																																			1
268.				Tipulidae	Tipula caloptera
269.					Tipula paludosa								1							1																									1
270.					Tipula sp.															1
271.		Trichoptera			Trichoptera gen.sp.																																							1
272.		Lepidoptera	Bombycoidea	Saturniidae	Dryocampa rubicunda
273.				Sphingidae	Eumorpha fasciata
274.			Gelechioidea	Gelechiidae	Anacampsis humilis																						1
275.					Tuta absoluta																						1
276.				Oecophoridae	Eutorna phaulacosma																						1
277.			Geometroidea	Geometridae	Enypia griseata
278.					Lambdina fiscellaria																						1
279.					Lambdina ﬁscellaria lugubrosa
280.					Rheumaptera hastata
281.			Lasiocampoidea	Lasiocampidae	Dendrolimus pini					1
282.					Dendrolimus spectabilis
283.					Malacosoma americanum
284.					Malacosoma disstria																							1
285.			Noctuoidea	Arctiidae	Spilosoma niveum
286.				Lymantriidae	Euproctis chrysorrhoea
287.					Lymantria dispar
288.					Orgyia vetusta
289.				Noctuidae	Aedia leucomelas
290.					Autographa gamma
291.					Chaetaglaea sericea
292.					Ellida caniplaga
293.					Eupsilia vinulenta
294.					Heliothis sp																						1
295.					Mamestra brassicae
296.					Mocis latipes					1
297.					Pseudaletia sequax
298.					Pseudaletia sp.
299.					Pseudoplusia includens																												1
300.					Orgyia vetusta
301.					Rachuplusia nu																												1
302.					Sericaglaea signata
303.					Sesamia inferens																						1
304.					Sunira bicolorago
305.					Trichoplusia ni																						1
306.					Xylotype capax
307.				Notodontidae	Heterocampa biundata
308.					Heterocampa guttivitta
309.			Papilionoidea	Pieridae	Colias erate poliographus
310.					Pieris brassicae																						1
311.					Pieris rapae																								1
312.			Pyraloidea	Pyralidae	Cnaphalocrocis medinalis																						1
313.			Tortricoidea	Tortricidae	Choristoneura fumiferana																						1
314.					Epinotia aporema																						1
315.					Merophyas divulsana																						1
316.					Ptycholoma aeriferana																						1
317.					Tortrix viridana																						1
318.			Yponomeutoidea	Plutellidae	Plutella maculipennis (larva)																										1
319.					Plutella xylostella																						1				1
320.		Coleoptera	Polyphaga	Tenebrionidae	Lagria villosa													1
321.				Curculionidae	Ceuthorhynchus napi					1
322.					Hymena variabilis larva								1
323.				Cantharidae	Cantharidae gen.sp.																																									1
324.				Elateridae	Athalia rosae																										1
325.					Agriotes sputator																	1
326.				Curculionidae	Hypera postica																					1
327.					Hypera punctata																					1
328.					Hypera variabilis																					1
329.			Adephaga	Carabidae	Trechus quadristriatus																	1
330.	Vertebrata	Amphibia	Anura	Bufonidae	dung			1
331.				Scaphiopodidae	Scaphiopus holbrooki dung			1
332.				Microhylidae	Gastrophryne carolinensis dung			1
333.		Lepidosauria	Squamata		Squamata gen.sp.		1
334.				Colubridae	Elaphe obsoleta				1
335.				Scincidae	Eumeces inexpectatus dung			1
336.				Scincidae	Scincella lateralis dung			1
337.				Teiidae	Cnemidophorus sexlineatus dung			1
338.				Viperidae	Crotalus horridus				1
339.		Mammalia	Primates	Hominidae	Homo sapiens	1		1		1
340.					Pan troglodytes					1
341.			Rodentia		dung		1
342.			Perissodactyla	Equidae	Equus ferus caballus			1		1	1
343.			Ruminantia	Bovidae	Ovis sp.						1			1
344.			Carnivora	Canidae	Canis lupus			1									1
[truncated: 41 more columns]

## Sheet: References
References for the host parasitization data collected in Table S3 in alphabetical order
Assefa, Y.; Conlong, D.E.; Mitchell, A. Status of Eldana saccharina (Lepidoptera: Pyralidae), its host plants and natural enemies in Ethiopia. Bulletin of Entomological Research 2006, 96, 497-504, doi:10.1079/BER2006451.
Balazy, S.; Mietkiewski, R.; Tkaczuk, C.; Wegensteiner, R.; Wrzosek, M. Diversity of acaropathogenic fungi in Poland and other European countries. Exp. Appl. Acarol. 2008, 46, 53-70, doi:10.1007/s10493-008-9207-1.
Batta, Y.A.; Rahman, M.; Powis, K.; Baker, G.; Schmidt, O. Formulation and application of the entomopathogenic fungus: Zoophthora radicans (Brefeld) Batko (Zygomycetes: Entomophthorales). J. Appl. Microbiol. 2011, 110, 831-839, doi:10.1111/j.1365-2672.2011.04939.x.
Bogus, M.I.; Czygier, M.; Golebiowski, M.; Kedra, E.; Kucinska, J.; Mazgajska, J.; Samborski, J.; Wieloch, W.; Wloka, E. Effects of insect cuticular fatty acids on in vitro growth and pathogenicity of the entomopathogenic fungus Conidiobolus coronatus. Exp. Parasitol. 2010, 125, 400-408, doi:10.1016/j.exppara.2010.04.001.
Brey, P.T.; Latge, J.P.; Prevost, M.C. Integumental Penetration of the Pea Aphid, Acyrthosiphon pisum, by Conidiobolus obscurus (Entomophthoraceae). J. Invertebr. Pathol. 1986, 48, 34-41.
Casique-Valdes, R.; Sanchez-Pena, S.; Ivonne Torres-Acosta, R.; Bidochka, M.J. A PCR-based method to identify Entomophaga spp. infections in North American grasshoppers. J. Invertebr. Pathol. 2012, 109, 169-171, doi:10.1016/j.jip.2011.11.009.
Castrillo, L.A.; Thomsen, L.; Juneja, P.; Hajek, A.E. Detection and quantification of Entomophaga maimaiga resting spores in forest soil using real-time PCR. Mycol. Res. 2007, 111, 324-331, doi:10.1016/j.mycres.2007.01.010.
Chun, C.; Mingguang, F. Observation on the initial inoculum source and dissemination of Entomophthorales-caused epizootics in populations of cereal aphids. Sci China C Life Sci 2004, 47, 38-43, doi:10.1360/02yc0261.
Comerio, R.M.; Andorno, A.V.; Botto, E.N. Aislamiento de Conidiobolus coronatus a partir de una plaga de áfidos del cebollín (Allium schoenoprasum L.). Rev. Iberoam. Micol. 2008, 25, 193-195.
Dean, G.J.W.; Wilding, N. Entomophthora infecting the cereal aphids Metapolophium dirhodum and Sitobion avenae. J. Invertebr. Pathol. 1971, 18, 169-176.
Dromph, K.M.; Eilenberg, J.; Esbjerg, P. Natural occurrence of entomophthoralean fungi pathogenic to collembolans. J. Invertebr. Pathol. 2001, 78, 226-231, doi:10.1006/jipa.2002.5077.
Eilenberg, J.; Michelsen, V. Natural host range and prevalence of the genus Strongwellsea (Zygomycota: Entomophthorales) in Denmark. J. Invertebr. Pathol. 1999, 73, 189-198.
Elliot, S.L.; Mumford, J.D.; de Moraes, G.J. The role of resting spores in the survival of the mite-pathogenic fungus Neozygites floridana from Mononychellus tanajoa during dry periods in Brazil. J. Invertebr. Pathol. 2002, 81, 148-157.
Feng, M.G.; Chen, C.; Chen, B. Wide dispersal of aphid-pathogenic Entomophthorales among aphids relies upon migratory alates. Environ. Microbiol. 2004, 6, 510-516, doi:10.1111/j.1462-2920.2004.00594.x.
Filotas, M.J.; Hajek, A.E. Variability in thermal responses among Furia gastropachae isolates from different geographic origins. J. Invertebr. Pathol. 2007, 96, 109-117, doi:10.1016/j.jip.2007.03.002.
Freimoser, F.M.; Screen, S.; Hu, G.; St Leger, R. EST analysis of genes expressed by the zygomycete pathogen Conidiobolus coronatus during growth on insect cuticle. Microbiology (Reading) 2003, 149, 1893-1900, doi:10.1099/mic.0.26252-0.
Gokce, A.; Er, M.K. First description of the disease by Conidiobolus osmodes on Tipula paludosa larvae with the report of a natural epizootic. J. Invertebr. Pathol. 2003, 84, 83-89, doi:10.1016/j.jip.2003.09.004.
Guzman-Franco, A.W.; Atkins, S.D.; Alderson, P.G.; Pell, J.K. Development of species-specific diagnostic primers for Zoophthora radicans and Pandora blunckii; two co-occurring fungal pathogens of the diamondback moth, Plutella xylostella. Mycol. Res. 2008, 112, 1227-1240, doi:10.1016/j.mycres.2008.04.006.
Hajek, A.E., Jensen, A. B., Thomsen, L., Hodge, K. T., Eilenberg, J. PCR-RFLP is used to investigate relations among species in the entomopathogenic genera Eryniopsis and Entomophaga. Mycologia 2003, 95, 262-268.
Hajek, A.E., Walsh, S. R. A., Strong, D. R., Silver J. C. A Disjunct Californian strain of Entomophaga aulicae infecting Orgyia vetusta. J. Invertebr. Pathol. 1996, 68, 260-268.
Hajek, A.E.; Ramos, M.E.; Soper, R.S. Infection of grasshoppers (Orthoptera: Acrididae) by members of the Entomophaga grylli Species Complex (Zygomycetes: Entomopthorales). J. Invertebr. Pathol. 1988, 52, 309-313.
Hannam, J.J.; Steinkraus, D.C. The natural occurrence of Pandora heteropterae (Zygomycetes: Entomophthorales) infecting Lygus lineolaris (Hemiptera: Miridae). J. Invertebr. Pathol. 2010, 103, 96-102, doi:10.1016/j.jip.2009.11.002.
Hartmann, G.C.; Wasti, S.S. Infection of the Gypsy Moth, Porthetria dispar with the entomogenous fungus Conidiobolus coronatus. Entomophaga 1974, 3, 353-360.
Hodge, K.T.; Sawyer, A.L.; Humbert, R.A. RAPD-PCR for Identification of Zoophthora radicans Isolates in biological control of potato leafhopper. J. Invertebr. Pathol. 1995, 65, 1-9.
Humber, R.A. The Systematics of the Genus Strongwellsea (Zygomycetes: Entomophthorales). Mycologia 1976, 68, 1042-1060.
Jensen, A.B.; Eilenberg, J.; Lopez Lastra, C. Differential divergences of obligately insect-pathogenic Entomophthora species from fly and aphid hosts. FEMS Microbiol. Lett. 2009, 300, 180-187, doi:10.1111/j.1574-6968.2009.01778.x.
Jensen, A.B.; Thomsen, L.; Eilenberg, J. Value of host range, morphological, and genetic characteristics within the Entomophthora muscae species complex. Mycol. Res. 2006, 110, 941-950, doi:10.1016/j.mycres.2006.06.003.
Kalsbeek, V.; Mullens, B.A.; Jespersen, J.B. Field Studies of Entomophthora (Zygomycetes: Entomophthorales)—Induced Behavioral Fever in Musca domestica (Diptera: Muscidae) in Denmark. Biol. Control 2001, 21, 264-273, doi:10.1006/bcon.2001.0943.
Kramer, J.P. The House-Fly Mycosis Caused by Entomophthora muscae: Influence of Relative Humidity on Infectivity and Conidial Germination. J. N. Y. Entomol. Soc. 1980, 88, 236-240.
Lamb, D.J.; Foster, G.N. Some observations on Strongwellsea castrans (Zygomycetes: Entomophthorales), a parasite of Root Flies (Delia spp.), in the South of Scotland. Entomophaga 1986, 31, 91-97.
Lambiase, J.T.; Yendol, W.G. The fine structure of Entomopthora apiculata and its penetration of Trichoplusia ni. Can. J. Microbiol. 1977, 23, 452-464.
Leite, L.G.; Alves, S.B.; Takada, H.M.; Filho, A.B.; Roberts, D.W. Occurence of Entomophtho-rales on Spittlebugs pests of pasture in Eastern Sao Paolo State, Brazil. Arq. Inst. Biol. 2002, 69, 63-68.
Montserrat, M.; Castané, C.; Santamaria, S. Neozygites parvispora (Zygomycotina: Entomophthorales) causing an epizootic in Frankliniella occidentalis (Thysanoptera: Thripidae) on cucumber in Spain. J. Invertebr. Pathol. 1998, 71, 165-168.
Nadeau, M.P.; Dunphy, G.B.; Boisvert, J.L. Development of Erynia conica (Zygomycetes: Entomophthorales) on the cuticle of the Adult Black Flies Simulium rostratum and Simulium decorum (Diptera: Simuliidae). J. Invertebr. Pathol. 1996, 68, 50-58.
Nielsen, C.; Sommer, C.; Eilenberg, J.; Hansen, K.S.; Humber, R.A. Characterization of Aphid Pathogenic Species in the Genus Pandora by PCR Techniques andDigital Image Analysis. Mycologia 2001, 93, 864-874.
Ribeiro, A.E.; Gondim, M.G., Jr.; Calderan, E.; Delalibera, I., Jr. Host range of Neozygites floridana isolates (Zygomycetes: Entomophthorales) to spider mites. J. Invertebr. Pathol. 2009, 102, 196-202, doi:10.1016/j.jip.2009.08.012.
Sanchez, S.E.M.; Humber, R.A.; Freitas, A.L.; Pinheiro, A.M.C.M. Batkoa apiculata (Thaxter) Humber affecting Anopheles (Diptera: Culicidae) in the municipality of Una, Southern Bahia, Brazil. Entomotropica 2010, 25, 63-68.
Shemanchuk, J.A.; Humber, R.A. Entomophthora culicis (Phycomycetes: Entomopthorales) Parasitizing Black Fly adults (Diptera: Simuliidae) in Alberta. Can. Entomol. 1978, 110, 253-256.
Sosa-Gomez, D.R.; Lastra, C.C.; Humber, R.A. An overview of arthropod-associated fungi from Argentina and Brazil. Mycopathologia 2010, 170, 61-76, doi:10.1007/s11046-010-9288-3.
Steenberg, T.; Jespersen, J.B.; Jensen, K.M.; Nielsen, B.O.; Humber, R.A. Entomopathogenic fungi in flies associated with pastured cattle in Denmark. J. Invertebr. Pathol. 2001, 77, 186-197, doi:10.1006/jipa.2001.5021.
Steinkraus, D.C.; Kramer, J.P. Susceptibility of sixteen species of Diptera to the fungal pathogen Entomophthora muscae (Zygomycetes: Entomophthoraceae). Mycopathologia 1987, 100, 55-63.
Thomsen, L.; Eilenberg, J. Entomophthora muscae resting spore formation in vivo in the host Delia radicum. J. Invertebr. Pathol. 2000, 76, 127-130, doi:10.1006/jipa.2000.4961.
Toledo, A.V.; Humber, R.A.; Lastra, C.C. First and southernmost records of Hirsutella (Ascomycota: Hypocreales) and Pandora (Zygomycota: Entomophthorales) species infecting Dermaptera and Psocodea. J. Invertebr. Pathol. 2008, 97, 193-196, doi:10.1016/j.jip.2007.09.001.
Tymon, A.M.; Shah, P.A.; Pell, J.K. PCR-based molecular discrimination of Pandora neoaphidis isolates from related entomopathogenic fungi and development of species-specific diagnostic primers. Mycol. Res. 2004, 108, 419-433, doi:10.1017/s0953756204009694.
Uziel, A.; Kenneth, R.G. Influence of commercially derived lipids and a surfactant on the mode of germination and process of germ-tube formation in primary conidia of two species of Erynia subgenus Neopandora (Zygomycotina: Entomophthorales). Mycopathologia 1999, 144, 153-163.
Villacarlos, L.T.; Mejia, B.S.; Keller, S. Entomophthora leyteensis Villacarlos & Keller sp. nov. (Entomophthorales: Zygomycetes) infecting Tetraleurodes acaciae (Quaintance) (Insecta, Hemiptera: Aleyrodidae), a recently introduced whitefly on Gliricidia sepium (Jaq.) Walp. (Fabaceae) in the Philippines. J. Invertebr. Pathol. 2003, 83, 16-22, doi:10.1016/s0022-2011(03)00036-3.
Vingaard, M.G.; Steinkraus, D.C.; Boys, G.O.; Eilenberg, J. Effects of long-term storage at −14°C on the survival of Neozygites fresenii (Entomophthorales: Neozygitaceae) in cotton aphids (Homoptera: Aphididae). J. Invertebr. Pathol. 2003, 82, 97-102, doi:10.1016/s0022-2011(02)00205-7.
Wekesa, V.W.; Vital, S.; Silva, R.A.; Ortega, E.M.; Klingen, I.; Delalibera, I., Jr. The effect of host plants on Tetranychus evansi, Tetranychus urticae (Acari: Tetranychidae) and on their fungal pathogen Neozygites floridana (Entomophthorales: Neozygitaceae). J. Invertebr. Pathol. 2011, 107, 139-145, doi:10.1016/j.jip.2011.04.003.
Wraight, S.P.; Molloy, D.; Jamnback, H.; McCoy, P. Effects of temperature and instar on the efficacy of Bacillus thuringiensis var. israelensis and Bacillus sphaericus Strain 1593 against Aedes stimulans Larvae. J. Invertebr. Pathol. 1981, 38, 78-87.
Ze`ev, I.S.B.; Zelig, Y.; Bitton, S.; Kenneth, R.G. The Entomophthorales of Israel and their arthropod hosts: Additions 1980-1988. Phytoparasitica 1988, 16 (3), 247-257.
Ze`ev, I.S.B.; Zelig, Y.; Bitton, S.; Kenneth, R.G. The Entomophthorales of Israel and their arthropod josts: Seasonal occurence. Phytoparasitica 1984, 12 (3-4), 167-176.
